# Supplementary material for: Interaction of sleep quality and sleep duration on impaired fasting glucose: a population-based cross-sectional survey in China
Source: PubMed Central journal article supplement — BMJ Open. 2014 Mar 13;4(3):e004436. doi: 10.1136/bmjopen-2013-004436 (PMC3963090; doi:10.1136/bmjopen-2013-004436), 2014-03-13
Supplement: bmjopen-2013-004436.draft_revisions.pdf [file bmjopen-2013-004436.draft_revisions.pdf]

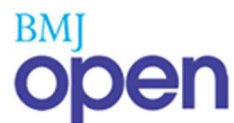

**Interaction of sleep quality and sleep duration on impaired fasting glucose: A population-based cross-sectional survey in China**

|                                 |                                                                                                                   |
|---------------------------------|-------------------------------------------------------------------------------------------------------------------|
| Journal:                        | <i>BMJ Open</i>                                                                                                   |
| Manuscript ID:                  | bmjopen-2013-004436                                                                                               |
| Article Type:                   | Research                                                                                                          |
| Date Submitted by the Author:   | 08-Nov-2013                                                                                                       |
| Complete List of Authors:       | Lou, Peian<br>Chen, Peipei<br>Zhang, Lei<br>Zhang, Pan<br>Chang, Guiqiu<br>Zhang, Ning<br>Li, Ting<br>Qiao, Cheng |
| <b>Primary Subject Heading</b>: | Diabetes and endocrinology                                                                                        |
| Secondary Subject Heading:      | Epidemiology                                                                                                      |
| Keywords:                       | DIABETES & ENDOCRINOLOGY, General diabetes < DIABETES & ENDOCRINOLOGY, EPIDEMIOLOGY                               |
|                                 |                                                                                                                   |

SCHOLARONE™  
Manuscripts

Only

**Interaction of sleep quality and sleep duration on impaired fasting glucose:**

**A population-based cross-sectional survey in China**

**Peian Lou<sup>\*</sup>, Peipei Chen, Lei Zhang, Pan Zhang, Guiqiu Chang, Ning Zhang, Ting Li, Cheng Qiao**

Department of Control and Prevention of Chronic Non-communicable Diseases, Xuzhou  
Center for Disease Control and Prevention, Xuzhou, China

**\*Corresponding author:** Peian Lou, phone: 0516-85956785, fax: 0516-89596797  
42 West Erhuan Road, Xuzhou City, Jiangsu Province, China  
E-mail: lpa82835415@126.com

**Key words:** Interaction; Sleep quality; Sleep duration; Impaired fasting glucose

**Word count: 2543**

For peer review only

1  
2  
3  
4  
5  
6  
7  
8  
9  
10  
11  
12  
13  
14  
15  
16  
17  
18  
19  
20  
21  
22  
23  
24  
25  
26  
27  
28  
29  
30  
31  
32  
33  
34  
35  
36  
37  
38  
39  
40  
41  
42  
43  
44  
45  
46  
47  
48  
49  
50  
51  
52  
53  
54  
55  
56  
57  
58  
59  
60

**Abstract**

**Objectives:** To explore the interactions of sleep quality and sleep duration and their effects on impaired fasting glucose in Chinese adults.

**Design:** Cross-sectional survey.

**Setting:** Community-based investigation in Xuzhou, China.

**Participants:** 15,145 Chinese men and women aged 18–75 years old who fulfilled the inclusion criteria.

**Primary and secondary outcome measures:** The Pittsburgh Sleep Quality Index was used to produce sleep quality categories of good, common and poor. Fasting blood glucose levels were assessed for impaired fasting glucose. Sleep duration was measured by average hours of sleep per night, with categories of <6 h, 6–8 h, and >8 h. The products of sleep and family history of diabetes, obesity and age were added to the logistic regression model to evaluate the additive interaction and relative excess risk of interaction (RERI) on impaired fasting glucose. The attributable proportion (AP) of the interaction and the synergy index (S) were applied to evaluate the additive interaction of two factors. Bootstrap measures were used to calculate 95% confidence intervals (CI) of RERI, AP and S.

**Results:** After adjusting for sex, smoking, drinking and amount of exercise, RERI, AP and S values (and their 95% CI) were 1.69 (0.31–3.76), 0.42 (0.15–0.61) and 2.85 (2.14–3.92) for the interaction between poor sleep quality and short sleep duration, and 0.78 (0.12–1.43), 0.61 (0.26–0.87) and –65 (–0.94 to –0.27) for the interaction between good sleep quality and long sleep duration.

**Conclusions:** The results suggest that there are additive interactions between poor sleep quality and short sleep duration.

**ARTICLE SUMMARY**

## Article focus

- To describe the combined effects of sleep duration and sleep quality for impaired fasting glucose in people in Xuzhou, China.

## Key messages

- There exist additive interactions between sleep quality and sleep duration on impaired fasting glucose.

- A strength of the study is the large sample.

- Limitations of the study the cross-sectional design.

## Introduction

1  
2  
3  
4  
5  
6  
7  
8  
9  
10  
11  
12  
13  
14  
15  
16  
17  
18  
19  
20  
21  
22  
23  
24  
25  
26  
27  
28  
29  
30  
31  
32  
33  
34  
35  
36  
37  
38  
39  
40  
41  
42  
43  
44  
45  
46  
47  
48  
49  
50  
51  
52  
53  
54

Prediabetes has a prevalence of 15.5% and affects an estimated 148.2 million Chinese adults.<sup>1</sup> Prediabetes, including impaired fasting glucose (IFG) and impaired glucose tolerance (IGT), is the most important risk factor for type 2 diabetes. The average annual incidence of diabetes in a cohort of patients with IFG is 11% over a six-year period without intervention.<sup>2</sup> Older age, a family history of diabetes, being overweight, obesity, central obesity, increased heart rate, elevated systolic blood pressure, elevated serum triglyceride levels, high income, history of hypertension, history of coronary heart disease, history of drinking, eating pickled foods, and low educational level are significantly associated with an increased risk of prediabetes.<sup>1,3</sup> Increasingly, studies have shown that prediabetes is associated with poor sleep quantity and quality.<sup>3,4</sup> A cross-sectional study has suggested that, compared with those sleeping 7–8 h per night, individuals aged <60 years who slept 5 h or less had an increased odds ratio (OR) for IGT (OR: 1.37, 95% confidence interval [CI]: 1.13–1.67).<sup>4</sup> The Western New York Health Study including 1455 participants showed that sleep duration of less than 6 h was associated with increased prevalence of IFG, compared with those sleeping 6–8 h per night, after adjustment for confounders, over six years of follow up.<sup>5</sup> Spiegel et al. have demonstrated that experimental restriction of sleep to <4 h per night for six nights resulted in an impaired glucose tolerance (IGT) in young healthy adults.<sup>6</sup>

Our previous results suggest that poor quality of sleep and sleep duration <6 h per night are independent risk factors for type 2 diabetes, even after adjusting for a large number of possible confounders.<sup>7,8</sup> Our previous study also confirmed that relatively healthy individuals with poor sleep quality and sleeping times of 6 h or less had a higher risk of IFG, even after adjusting for a large number of confounding factors.<sup>3</sup>

Although these risk factors play a role in the development of type 2 diabetes, the disease is the result of the interaction of genetic and environmental factors. There is little understanding of multivariate explanations of IFG in relatively healthy individuals. To our knowledge, there are no studies on the interaction of sleep quality and sleep duration on IFG in relatively healthy individuals. The primary aim of this cross-sectional study was to examine the combined effects of sleep quality and sleep duration on IFG in relatively healthy individuals in a Chinese primary-care setting. A secondary aim was to assess the associations of sleep quality and IFG, and of sleep duration and IFG.

## Methods

55  
56  
57  
58  
59  
60

The study was a continuation of our previous work.<sup>9</sup> The investigation was conducted from March to November 2012 with a sample size of 15,145 volunteers (7557 men and 7588 women) aged 18 to 75 years. All volunteers received a health check and completed a structured questionnaire covering demographic information, medical history, medication

1 history, sleep assessment, and smoking, alcohol drinking and exercise habits. All volunteers  
2 underwent 12-h overnight fasting and blood sampling for basic fasting plasma glucose (FPG).  
3 After blood sampling, each volunteer completed the Pittsburgh Sleep Quality Index (PSQI).<sup>10</sup>  
4 We excluded volunteers who were pregnant, had received antihypertensive medication, or  
5 were suffering from any cardiovascular disease, stroke, neuropathy, psychosis, depression,  
6 chronic obstructive pulmonary disease, obstructive sleep apnea, diabetes, ache, or any other  
7 disease. Those who had missing information on sleep duration or sleep quality were also  
8 excluded. Trained physicians and public health workers conducted face-to-face interviews  
9 using a standardized questionnaire to collect socio-demographic, lifestyle and health-related  
10 information.

11 The study protocol was approved by the Xuzhou Center for Disease Control and  
12 Prevention. All participants provided written informed consent.

### 21 **Key measurements**

22 The FPG was determined by morning blood samples obtained by venipuncture after an  
23 overnight fast of at least 12h, and extracted plasma was stored at  $-70^{\circ}\text{C}$  for later glucose  
24 determination by the hexokinase method. According to the current WHO definition of IFG<sup>10</sup>.

25 The PSQI is a validated self-rated questionnaire that assesses sleep quality over a  
26 one-month time interval.<sup>11</sup> Nineteen items generate seven component scores that reflect sleep  
27 problems in the areas of subjective sleep quality, sleep latency, sleep duration, habitual sleep  
28 efficiency, sleep disturbances, use of sleep medications and daytime dysfunction. The sum of  
29 the scores for these seven components produces a global sleep quality score within a range of  
30 0–21 points. A global PSQI score  $>5$  has a diagnostic sensitivity of 89.6% and specificity of  
31 86.5% in differentiating poor from good sleepers. The Chinese version of the PSQI, used with  
32 permission from the original PSQI authors, has an overall reliability coefficient of 0.82–0.83  
33 and acceptable test–retest reliability, with a coefficient of 0.77–0.85.<sup>12</sup> Sleep quantity was  
34 categorized as  $<6$ , 6–8, and  $>8$  h per night.

### 46 **Covariates**

47 Age, gender, current employment status, level of education, cigarette smoking, alcohol  
48 intake, physical activity, family history of diseases including diabetes, hypertension, heart  
49 disease, and cancer were assessed using a standardized questionnaire. Employment status was  
50 categorized as manual, non-manual, unemployed, and retired. Education was categorized into  
51 below high school, high school, or above high school education. Lifestyle variables included  
52 cigarette smoking, alcohol drinking and physical activity level. Cigarette smoking was  
53 defined as having smoked at least 100 cigarettes in a lifetime. Information was obtained on  
54 the amount and type of alcohol that was consumed during the previous year, and alcohol  
55 drinking was defined as the consumption of at least 30 g of alcohol per week for one year or  
56  
57  
58  
59  
60

1  
2  
3  
4  
5  
6  
7  
8  
9  
10  
11  
12  
13  
14  
15  
16  
17  
18  
19  
20  
21  
22  
23  
24  
25  
26  
27  
28  
29  
30  
31  
32  
33  
34  
35  
36  
37  
38  
39  
40  
41  
42  
43  
44  
45  
46  
47  
48  
49  
50  
51  
52  
53  
54  
55  
56  
57  
58  
59  
60

more. Regular leisure-time physical activity was defined as participating in moderate or vigorous activity for no less than 30 minutes per day at least three days a week. Each volunteer's body height (to the nearest 0.1 cm) and weight (to the nearest 0.1 kg) in light indoor clothing were measured. Body mass index (BMI; in  $\text{kg}/\text{m}^2$ ) was calculated. BMI was categorized as underweight ( $<18.5 \text{ kg}/\text{m}^2$ ), normal weight ( $18.5\text{--}24.0 \text{ kg}/\text{m}^2$ ) and overweight/obese ( $>24.0 \text{ kg}/\text{m}^2$ ).<sup>13</sup>

### Statistical analysis

Statistical analysis was performed on a computer, using the statistical analysis program SPSS 13.0 (SPSS, Chicago, IL, USA). Mean differences of continuous variables between groups were tested using analysis of variance (ANOVA). The chi-squared test was used to calculate the difference in proportions between groups. Logistic regression analysis was performed to estimate the probability of having IFG and 95% CI for each risk factor category stratified by sleep quality and sleep duration, adjusting for age, residential areas, occupation, education and income levels, leisure-time physical activity, smoking status, drinking status and hypertension status. The observed prevalences of IFG were plotted and stratified by sleep quality and sleep duration.

Biological interactions should be based on the sum of the scale rather than multiplying the scale.<sup>14, 15</sup> Therefore, we used three measures to estimate biological interactions of poor sleep quality and short sleep duration: relative excess risk owing to interaction (RERI), the attributable proportion (AP) owing to interaction, and the synergy index (S). The RERI is the excess risk attributed to interaction relative to the risk without exposure to poor sleep quality and short sleep duration. AP refers to the attributable proportion of disease caused by interaction in subjects with exposure to both variables. S is the excess risk from exposure to both variables when there is a biological interaction relative to the risk from exposure to both variables without interaction. In the absence of additive interactions, RERI and AP are equal to 0.<sup>16</sup> In the current study,  $\text{RERI} > 0$ ,  $\text{AP} > 0$  and  $\text{S} > 0$  indicate statistical significance. A  $p$  value  $< 0.05$  (two-tailed) was considered statistically significant.

## Results

### General characteristics of participants

15,145 adults (7557 men and 7588 women) with complete data were included in our analysis. The average age was  $47.6 \pm 15.1$  years. Among them, 634 had IFG; the remainder had normal glucose tolerance (NGT). The characteristics of the study population are presented in Table 1. The proportion of volunteers with poor sleep quality was 26.0%, the proportion with sleep duration  $<6$  h was 12.5%, the proportion with sleep duration  $>8$  h was 12.3%. The 6.7% prevalence of IFG in volunteers with poor sleep quality was higher than that in volunteers

1 with good sleep quality ( $\chi^2 = 85.98, p < 0.001$ ). Individuals with sleep duration  $<6$  h had a  
2 higher IFG prevalence compared with individuals with sleep duration 6–8 h, (7.3 vs 3.3%;  $\chi^2$   
3 = 72.20,  $p < 0.001$ ). Individuals with sleep duration  $>8$  h also had also had higher prevalence  
4 of IFG (6.2 vs 3.3%;  $\chi^2 = 37.78, p < 0.001$ ).  
5  
6

### 7 **Comparison of PSQI scores between the volunteers with IFG and NGT**

8  
9 Volunteers with IFG had significantly higher global PSQI scores than those with NGT. For  
10 all PSQI items except sleep duration, there were significant differences ( $p < 0.05$ ) in PSQI  
11 scores between the two groups (Table 2).  
12  
13

### 14 **Biological interaction of sleep quality and sleep duration on the prevalence of IFG**

15  
16 We used a combined effects method to assess interaction, with the  $p$  value of the interaction  
17 term indicating statistical significance of additive interactions. Individuals with poor sleep  
18 quality or short sleep duration had significantly increased risk of IFG compared with those  
19 with good sleep quality and sleep duration 6–8 h (OR: 2.48; 95% CI: 2.12–3.03; OR: 2.79;  
20 95% CI: 2.19–3.58; respectively. all  $P < 0.001$ ), after adjusting for confounders. Table 3 shows  
21 the results from the multiple logistic regression models. The prevalence of IFG was greatest  
22 in those with poor sleep quality and short sleep duration (OR: 6.37; 95% CI: 4.66–8.67;  $p <$   
23 0.001), after adjusting for confounders. In addition, individuals with long sleep duration had a  
24 significantly increased risk of IFG compared with those who had good sleep quality and sleep  
25 duration of 6–8 h (OR: 2.37; 95% CI: 1.89–2.96;  $p < 0.001$ ), after adjusting for confounders.  
26 The prevalence of IFG was also greater in those with good sleep quality with long sleep  
27 duration (OR: 3.17; 95% CI: 2.29–4.41;  $p < 0.001$ ), compared with those with 6–8 h sleep  
28 duration, after adjusting for confounders.  
29  
30  
31  
32  
33  
34  
35  
36  
37  
38  
39

### 40 **Sensitivity analysis**

41  
42 There was a strong additive interaction between poor sleep quality and short sleep  
43 duration (RERI: 1.69; 95% CI: 0.31–3.76.), with 42% of occurring IFG attributed to the  
44 interaction between poor sleep quality and short sleep duration (Table 3). There was also  
45 interaction between good sleep quality and long sleep duration (RERI: 0.78; 95% CI:  
46 0.12–1.43), with 61% of occurring IFG attributed to the interaction between good sleep  
47 quality and long sleep duration (Table 4).  
48  
49  
50  
51  
52  
53  
54

### 55 **Discussion**

56  
57 The two main findings of this study were, firstly, that there is combined interaction of  
58 poor sleep quality and short sleep duration on the prevalence of IFG. Secondly, that total  
59 PSQI scores of volunteers with IFG were higher than those of volunteers with NGT. We also  
60



found that poor sleep quality and short or long sleep duration increased risk for IFG in a Chinese population, independent of potential confounders such as age, obesity, family history of diabetes, alcohol consumption, smoking, physical activity, and other diseases.

Numerous epidemiologic studies have demonstrated associations between short or long sleep duration and sleep disturbances and diabetes.<sup>17-23</sup> However, few articles focused on IFG, and the results of these are inconsistent.<sup>5,24</sup> Rafalson et al.<sup>5</sup> reported the OR of IFG among short sleepers was 3.0 (95% CI: 1.05–8.59) compared with mid-range sleepers with multivariate conditional logistic regression after adjustment for several diabetes risk factors. Hung et al.<sup>24</sup> reported no association between IFG and poor sleepers. Our findings are consistent with the report by Rafalson et al.

The global PSQI scores in volunteers with IFG were higher than those in volunteers with NGT, which was consistent with the Hung et al. report.<sup>24</sup> However, there was no difference in sleep duration scores between the volunteers with IFG and the volunteers with NGT. This could be attributed to the fact that 18.3% (116/634) of the volunteers with IFG were long sleepers, while short sleepers with IFG only accounted for 22.9% (145/634).

Short sleep duration increases appetite. After four nights of 4.5 h in bed, compared with after four nights of 8.5 h in bed, caloric intake, especially of carbohydrate-rich nutrients, increased by 14% in young normal-weight men and women.<sup>25,26</sup> Middle-aged obese volunteers submitted to four to five nights of restriction of their habitual sleep schedule by 2–3 h/night ate 15% more calories than those whose habitual sleep schedule was extended by the same amount.<sup>27</sup> In volunteers with sleep debt, glucose tolerance, glucose effectiveness and insulin sensitivity are decreased, and beta-cell function is reduced.<sup>6,26,28,29</sup> Sleep loss also results in decreased anorexigenic leptin levels,<sup>30-32</sup> especially in volunteers with chronic sleep restriction.<sup>33</sup> Observational epidemiologic studies have also shown reduced leptin levels, after controlling for BMI or adiposity, in habitual short sleepers.<sup>33,34</sup> Conversely, leptin deficiency disrupts sleep architecture and impairs sleep consolidation.<sup>35</sup> Taken together, these data suggest that sleep loss is likely to have a profound impact on IFG.

Poor sleep quality, independent of sleep duration, impairs glucose regulation in healthy young adults.<sup>36,37</sup> After three nights of slow-wave sleep suppression, insulin sensitivity is decreased by ~25%, reaching the level reported in older adults and in populations at high risk of diabetes.<sup>38</sup> The decrease in insulin sensitivity is not compensated for by an increase in insulin release. Consequently, the disposition index is ~20% lower. Consistent with an increased diabetes risk, glucose tolerance is reduced by ~23% reaching the range typical of older adults with impaired glucose tolerance.<sup>37</sup> Sleep fragmentation also increases sympathetic activity, which in turn leads to disorders of glucose metabolism.<sup>39</sup>

Taken together, short sleep duration, increased caloric intake, poor sleep quality, decreased leptin levels, decreased insulin sensitivity and increased sympathetic activity affect each other, creating a vicious circle, which elevates the risk of IFG.



1  
2  
3  
4  
5  
6  
7  
8  
9  
10  
11  
12  
13  
14  
15  
16  
17  
18  
19  
20  
21  
22  
23  
24  
25  
26  
27  
28  
29  
30  
31  
32  
33  
34  
35  
36  
37  
38  
39  
40  
41  
42  
43  
44  
45  
46  
47  
48  
49  
50  
51  
52  
53  
54  
55  
56  
57  
58  
59  
60

Despite the absence of the synergistic effect of good-quality sleep with long sleep duration, a strong association of IFG with long sleep duration in individuals was observed, suggesting an independent effect of long sleep duration.

This study had several potential limitations. Firstly, because of the cross-sectional design, we could not determine a causal relationship between sleep quality, sleep duration and IFG. Secondly, we were not able to control for some important and well-known risk factors of diabetes, for example, snoring.<sup>40</sup> Thirdly, we did not measure poor diet, which is causally related to type 2 diabetes and may also influence sleep patterns.<sup>41,42</sup>

There are several notable strengths of this study. Participants were randomly selected from the general population of Xuzhou. In addition, the sample was large. Many confounding risk factors were adjusted for.

In summary, volunteers who experience short sleep durations are six times more likely to develop IFG than those whose average sleep was 6–8 h a night with good sleep quality. The joint effect of short sleep duration and poor sleep quality was positive.

### Acknowledgments

This research was funded by the Preventive Medicine research projects of Jiangsu Province Health Department from 2007 to 2008 (Y200703) and the Science and Technology projects of Xuzhou City in 2008 (XM08C041).

### Conflict of Interest Statement

None of the authors have a financial relationship with a commercial entity that has an interest in the subject of this manuscript. The researchers were independent from funders. The study funders had no influence on the study design, data collection, analysis, interpretation of data, writing of the report, or decision to submit the article for publication.

**Contributors** Steering Committee: PL (principal investigator), PC (principal investigator), PC and LZ. Operating Committee: LZ,PZ, GC, NZ, TL and CQ.

### References

1. Yang W, Lu J, Weng J, et al. China National Diabetes and Metabolic Disorders Study Group. Prevalence of diabetes among men and women in China. *N Engl J Med* 2010; 362:1090-1 101.
2. Li G, Zhang P, Wang J, et al. The long-term effect of lifestyle interventions to prevent diabetes in the China Da Qing Diabetes Prevention Study: a 20-year follow-up study.

Lancet 2008; 24;371(9626):1783-9.

- 1  
2  
3  
4  
5  
6  
7  
8  
9  
10  
11  
12  
13  
14  
15  
16  
17  
18  
19  
20  
21  
22  
23  
24  
25  
26  
27  
28  
29  
30  
31  
32  
33  
34  
35  
36  
37  
38  
39  
40  
41  
42  
43  
44  
45  
46  
47  
48  
49  
50  
51  
52  
53  
54  
55  
56  
57  
58  
59  
60
3. Lou P, Chen P, Yu J, et al. Analysis on the risk factors of the residents with impaired fasting glucose in Xuzhou. *Chin J Dis Control Prev* 2011; 15( 3) : 192-195.
4. Najafian J, Mohamadifard N, Siadat ZD, et al. Association between sleep duration and diabetes mellitus: Isfahan Healthy Heart Program. *Niger J Clin Pract* 2013; 16(1):59-62.
5. Rafalson L, Donahue RP, Stranges S, Lamonte MJ, et al. Short sleep duration is associated with the development of impaired fasting glucose: the Western New York Health Study. *Ann Epidemiol* 2010; 20(12):883-9.
6. Spiegel K, Leproult R, Van Cauter E. Impact of sleep debt on metabolic and endocrine function. *Lancet* 1999; 354:1435-9.
7. Lou P, Chen P, Zhang L, et al. Relation study of sleep quality and sleep duration to type 2 diabetes: a population-based cross-sectional survey. *BMJ Open* 2012; 2:e000956.13.
8. Wu H, Lou P, Chen P, et al. survey the relationship between sleep quality and T2DM. *Chin J Diabetes* 2013; 21(4): 330-333.
9. Chen P, Lou P, Yu J, et al. Risk factors of diabetes mellitus of residents living in Xuzhou city. *Chin J Health Manage* 2010; 4:78-80.
10. [http://www.who.int/diabetes/publications/Definition%20and%20diagnosis%20of%20diabetes\\_new.pdf](http://www.who.int/diabetes/publications/Definition%20and%20diagnosis%20of%20diabetes_new.pdf)
11. Buysse DJ, Reynolds CF 3rd, Monk TH, et al. The Pittsburgh Sleep Quality Index: a new instrument for psychiatric practice and research. *Psychiatry Res* 1989; 28(2): 193–213.
12. Tsai, PS, Wang, SY, Wang, MY, et al. Psychometric evaluation of the Chinese version of the Pittsburgh Sleep Quality Index (CPSQI) in primary insomnia and control subjects. *Qual Life Res* 2005; 14(8):1943–1952.
13. Haseli-Mashhadi N, Dadd T, Pan A, et al. Sleep quality in middle-aged and elderly Chinese: distribution, associated factors and associations with cardio-metabolic risk factors. *BMC Public Health* 2009; 9:130.
14. Rothman KJ, Greenland S, Lash T L. *Modern epidemiology*, 3rd edition [M]. Philadelphia: Lippincott Williams & Wilkins, 2008.
15. Hosmer DW, Lemeshow S . Confidence interval estimation of interaction. *Epidemiology*

1992; 3(5):452-456.

- 1  
2  
3  
4  
5  
6  
7  
8  
9  
10  
11  
12  
13  
14  
15  
16  
17  
18  
19  
20  
21  
22  
23  
24  
25  
26  
27  
28  
29  
30  
31  
32  
33  
34  
35  
36  
37  
38  
39  
40  
41  
42  
43  
44  
45  
46  
47  
48  
49  
50  
51  
52  
53  
54  
55  
56  
57  
58  
59  
60
16. Knol MJ, VanderWeele TJ, Groenwold RHH, et al. Estimating measures of interaction on an additive scale for preventive exposures. *Eur J Epidemiol* 2011; 26(6):433–438.
17. Gottlieb DJ, Punjabi NM, Newman AB, et al. Association of sleep time with diabetes mellitus and impaired glucose tolerance. *Arch Intern Med* 2005 ;165: 863–868.
18. Yaggi HK, Araujo AB, McKinlay JB. Sleep duration as a risk factor for the development of type 2 diabetes. *Diabetes Care* 2006; 29: 657-661
19. Hayashino Y, Fukuhara S, Suzukamo Y, et al. Relation between sleep quality and quantity, quality of life, and risk of developing diabetes in healthy workers in Japan: the High-risk and Population Strategy for Occupational Health Promotion (HIPOP-OHP) Study. *BMC Public Health* 2007;7: 129.
20. Shankar A, Syamala S, Kalidindi S. Insufficient Rest or Sleep and Its Relation to Cardiovascular Disease, Diabetes and Obesity in a National, Multiethnic Sample. *PLoS ONE* 2010; 5(11): e14189.
21. Mallon L, Broman JE, Hetta J. High Incidence of Diabetes in Men With Sleep Complaints or Short Sleep Duration -A 12-year follow-up study of a middle-aged population. *Diabetes Care* 2005;28:2762–2767.
22. Nilsson PM, RÖÖst M, Engström M, et al. Incidence of Diabetes in Middle-Aged Men Is Related to Sleep Disturbances. *Diabetes Care* 2004;27:2464–2469.
23. Vgontzas AN, Liao D, Pejovic S, et al. Insomnia With Objective Short Sleep Duration Is Associated With Type 2 Diabetes : A population-based study. *Diabetes Care* 2009;32:1980–1985.
24. Hung HC, Yang YC, Ou HY, et al. The relationship between impaired fasting glucose and self-reported sleep quality in a Chinese population. *Clin Endocrinol (Oxf)* 2013;78(4):518-24.
25. Tasali E, Leproult R, Spiegel K. Reduced sleep duration or quality: relationships with insulin resistance and type 2 diabetes. *Prog Cardiovasc Dis* 2009; 51:381–391.
26. Nedeltcheva AV, Kessler L, Imperial J, et al. Exposure to recurrent sleep restriction in the

- setting of high caloric intake and physical inactivity results in increased insulin resistance and reduced glucose tolerance. *J Clin Endocrinol Metabol* 2009; 94:3242–3250.
- 1  
2  
3  
4 27. Morselli L, Balbo M, Van Cauter E, et al. Impact of sleep restriction on the regulation of  
5  
6  
7  
8  
9  
10  
11 28. Buxton OM, Pavlova M, Reid EW, et al. Sleep restriction for 1 week reduces insulin  
12  
13  
14  
15 29. Simpson NS, Banks S, Dinges DF. Sleep restriction is associated with increased morning  
16  
17  
18  
19  
20 30. Guilleminault C, Powell NB, Martinez S, et al. Preliminary observations on the effects of  
21  
22  
23  
24 31. Spiegel K, Leproult R, L'hermite-Balériaux M, et al. Leptin levels are dependent on sleep  
25  
26  
27  
28  
29  
30  
31 32. Spiegel K, Tasali E, Penev P, et al. Sleep curtailment in healthy young men is associated  
32  
33  
34  
35  
36  
37 33. Taheri S, Lin L, Austin D, et al. Short sleep duration is associated with reduced leptin,  
38  
39  
40  
41  
42 34. Chaput JP, Despres JP, Bouchard C, et al. Short sleep duration is associated with reduced  
43  
44  
45  
46  
47  
48 35. Laposky AD, Shelton J, Bass J, et al. Altered sleep regulation in leptin-deficient mice. *Am*  
49  
50  
51  
52  
53 36. Stamatakis KA, Punjabi NM. Effects of sleep fragmentation on glucose metabolism in  
54  
55  
56  
57 37. Tasali E, Leproult R, Ehrmann DA, et al. Slow-wave sleep and the risk of type 2 diabetes  
58  
59  
60

- 1  
2  
3  
4  
5  
6  
7  
8  
9  
10  
11  
12  
13  
14  
15  
16  
17  
18  
19  
20  
21  
22  
23  
24  
25  
26  
27  
28  
29  
30  
31  
32  
33  
34  
35  
36  
37  
38  
39  
40  
41  
42  
43  
44  
45  
46  
47  
48  
49  
50  
51  
52  
53  
54  
55  
56  
57  
58  
59  
60
38. Bergman RN. Lilly lecture 1989. Toward physiological understanding of glucose tolerance. Minimal-model approach. *Diabetes* 1989; 38:1512–1527
39. Peltier AC, Consens FB, Sheikh K, et al. Autonomic dysfunction in obstructive sleep apnea is associated with impaired glucose regulation. *Sleep Medicine* 2007.8(2): 149–155.
40. Al-Delaimy WK, Manson JE, Willett WC, et al. Snoring as a risk factor for type II diabetes mellitus: a prospective study. *Am J Epidemiol* 2002 ;155:387–393,
41. Tonstad SMD, Butler T, Yan R, et al. Type of Vegetarian Diet, Body Weight, and Prevalence of Type 2 Diabetes. *Diabetes Care* 2009;32(8):791-796.
42. Michael A. Grandner, Daniel F. et al. Linger Relationships among dietary nutrients and subjective sleep, objective sleep, and napping in women. *Sleep Med* 2010; 11: 180.

**Table 1** Baseline characteristics of the study population (N = 15,145)

| Reported variable                | All              | IFG              |                  |                  |
|----------------------------------|------------------|------------------|------------------|------------------|
|                                  |                  | No               | Yes              | P                |
| <b>n</b>                         | <b>15145</b>     | <b>14,511</b>    | <b>634</b>       |                  |
| <b>Age(years)</b>                | <b>47.6±15.1</b> | <b>47.4±14.7</b> | <b>52.2±16.2</b> | <b>8.012</b>     |
| ≥45 years                        | 8362             | 7928             | 434              | 0.000            |
| <b>Sex(% man)</b>                | <b>49.9</b>      | <b>50.0</b>      | <b>49.8</b>      | <b>0.938</b>     |
| Rural (%)                        | 72.4             | 72.4             | 72.9             | 0.795            |
| Manual                           | 10833            | 10359            | 474              | 0.023            |
| Non-manual                       | 1045             | 1016             | 29               |                  |
| Unemployed                       | 677              | 658              | 19               |                  |
| retired                          | 2590             | 2478             | 112              |                  |
| Marred (living with partners)(%) | 88.5             | 88.6             | 86.3             | 0.073            |
| <b>Below high school</b>         | <b>11899</b>     | <b>11400</b>     | <b>499</b>       | <b>0.986</b>     |
| <b>high school</b>               | <b>1760</b>      | <b>1686</b>      | <b>74</b>        |                  |
| <b>Above high school</b>         | <b>1486</b>      | <b>1425</b>      | <b>61</b>        |                  |
| smoker                           | 3514             | 3367             | 174              | 0.014            |
| alcohol use                      | 2872             | 2752             | 120              | 0.981            |
| Regular exercise                 | 2559             | 2452             | 107              | 0.989            |
| Family history of diabetes       | 483              | 362              | 121              | 0.000            |
| <b>BMI, mean(SD)</b>             | <b>23.9±4.7</b>  | <b>23.8±5.8</b>  | <b>25.2±4.1</b>  | <b>&lt;0.001</b> |
| Central obesity                  | 4613             | 4219             | 394              | 0.000            |
| Hypertension                     | 3060             | 2901             | 159              | 0.002            |
| Sleep duration(hour)             |                  |                  |                  |                  |
| ≤6                               | 1984             | 1839             | 145              | 0.000            |
| 6-8                              | 11292            | 10919            | 373              |                  |
| ≥8                               | 1869             | 1753             | 116              |                  |
| Sleep quality                    |                  |                  |                  |                  |
| Good                             | 11209            | 10840            | 369              | 0.000            |
| Poor                             | 3936             | 3671             | 265              |                  |

**Table 2** Comparison of Pittsburgh Sleep Quality Index scores between individuals with impaired fasting glucose and controls ( $\bar{x} \pm sd$ )

| Items                    | IFG       |           | Z value | P     |
|--------------------------|-----------|-----------|---------|-------|
|                          | No        | Yes       |         |       |
| Subjective sleep quality | 0.45±0.60 | 0.47±0.62 | -3.240  | <0.05 |
| Sleep latency            | 0.79±0.62 | 0.90±0.62 | -7.430  | <0.05 |
| Sleep duration           | 0.34±0.54 | 0.35±0.57 | -0.634  | 0.526 |
| Sleep efficiency         | 0.54±0.84 | 0.59±0.88 | -2.377  | <0.05 |
| Sleep disturbance        | 0.49±0.58 | 0.54±0.58 | -3.590  | <0.05 |
| Use of hypnotic          | 0.05±0.28 | 0.06±0.30 | -3.627  | <0.05 |
| Daytime dysfunction      | 0.16±0.49 | 0.20±0.54 | -3.272  | <0.05 |
| Global PSQI scores       | 2.81±2.27 | 3.09±2.34 | -5.655  | <0.05 |

**Table 3** Odds ratios for the association between sleep quality and impaired fasting glucose by sleep duration among participants

| Sleep quality versus sleep duration | Sleep quality | IFG | No IFG | OR (95%CI)       | P      |
|-------------------------------------|---------------|-----|--------|------------------|--------|
| Sleep duration 6–8h                 | Good          | 246 | 8743   | 1                |        |
|                                     | Poor          | 127 | 2176   | 1.98 (1.76–2.52) | <0.001 |
| Sleep duration <6h                  | Good          | 53  | 1329   | 1.38 (1.12–1.61) | <0.001 |
|                                     | Poor          | 92  | 510    | 6.37 (4.66–8.67) | <0.001 |
| Sleep duration >8h                  | Good          | 70  | 768    | 3.17 (2.29–4.41) | <0.001 |
|                                     | Poor          | 46  | 985    | 1.59 (1.08–2.29) | <0.001 |

Adjusted for age, sex, education, employment, BMI, family history of diabetes, smoking status, alcohol consumption and physical activity.



**Table 4** Measures for estimation of the biological interaction between sleep quality and sleep duration for the prevalence of impaired fasting glucose in participants

| Measures of biological interaction            | Estimate (95% CI)      |
|-----------------------------------------------|------------------------|
| Poor sleep quality versus sleep duration < 6h |                        |
| RERI                                          | <b>1.69(0.31—3.76)</b> |
| AP                                            | <b>0.42(0.15—0.61)</b> |
| S                                             | <b>2.85(2.14—3.92)</b> |
| Good sleep quality versus sleep duration > 8h |                        |
| RERI                                          | 0.78(0.12—1.43)        |
| AP                                            | 0.61(0.26—0.87)        |
| S                                             | -0.65(-0.94—-0.27)     |

Reference group is good sleep quality with 6-8 sleep duration.

Adjusted for age, sex, education, occupation, BMI, family history of diabetes, smoking status, alcohol consumption, and hypertension.

## STROBE Statement—checklist of items that should be included in reports of observational studies

|                          | Item No | Recommendation                                                                                                                                                                                                                                                                                                                                                                                                                                                         |          |
|--------------------------|---------|------------------------------------------------------------------------------------------------------------------------------------------------------------------------------------------------------------------------------------------------------------------------------------------------------------------------------------------------------------------------------------------------------------------------------------------------------------------------|----------|
| Title and abstract       | 1       | (a) Indicate the study's design with a commonly used term in the title or the abstract                                                                                                                                                                                                                                                                                                                                                                                 | Page 1   |
|                          |         | (b) Provide in the abstract an informative and balanced summary of what was done and what was found                                                                                                                                                                                                                                                                                                                                                                    | Page 2   |
| <b>Introduction</b>      |         |                                                                                                                                                                                                                                                                                                                                                                                                                                                                        |          |
| Background/rationale     | 2       | Explain the scientific background and rationale for the investigation being reported                                                                                                                                                                                                                                                                                                                                                                                   | Page 3   |
| Objectives               | 3       | State specific objectives, including any prespecified hypotheses                                                                                                                                                                                                                                                                                                                                                                                                       | Page 3   |
| <b>Methods</b>           |         |                                                                                                                                                                                                                                                                                                                                                                                                                                                                        |          |
| Study design             | 4       | Present key elements of study design early in the paper                                                                                                                                                                                                                                                                                                                                                                                                                | Page 3   |
| Setting                  | 5       | Describe the setting, locations, and relevant dates, including periods of recruitment, exposure, follow-up, and data collection                                                                                                                                                                                                                                                                                                                                        | Page 3-4 |
| Participants             | 6       | (a) <i>Cohort study</i> —Give the eligibility criteria, and the sources and methods of selection of participants. Describe methods of follow-up<br><i>Case-control study</i> —Give the eligibility criteria, and the sources and methods of case ascertainment and control selection. Give the rationale for the choice of cases and controls<br><i>Cross-sectional study</i> —Give the eligibility criteria, and the sources and methods of selection of participants | Page 4   |
|                          |         | (b) <i>Cohort study</i> —For matched studies, give matching criteria and number of exposed and unexposed<br><i>Case-control study</i> —For matched studies, give matching criteria and the number of controls per case                                                                                                                                                                                                                                                 |          |
| Variables                | 7       | Clearly define all outcomes, exposures, predictors, potential confounders, and effect modifiers. Give diagnostic criteria, if applicable                                                                                                                                                                                                                                                                                                                               | Page 4-5 |
| Data sources/measurement | 8*      | For each variable of interest, give sources of data and details of methods of assessment (measurement). Describe comparability of assessment methods if there is more than one group                                                                                                                                                                                                                                                                                   | Page 4-5 |
| Bias                     | 9       | Describe any efforts to address potential sources of bias                                                                                                                                                                                                                                                                                                                                                                                                              |          |
| Study size               | 10      | Explain how the study size was arrived at                                                                                                                                                                                                                                                                                                                                                                                                                              | Page 4   |
| Quantitative variables   | 11      | Explain how quantitative variables were handled in the analyses. If applicable, describe which groupings were chosen and why                                                                                                                                                                                                                                                                                                                                           | Page 4-5 |
| Statistical methods      | 12      | (a) Describe all statistical methods, including those used to control for confounding                                                                                                                                                                                                                                                                                                                                                                                  | Page 5   |
|                          |         | (b) Describe any methods used to examine subgroups and interactions                                                                                                                                                                                                                                                                                                                                                                                                    | Page 5   |
|                          |         | (c) Explain how missing data were addressed                                                                                                                                                                                                                                                                                                                                                                                                                            |          |
|                          |         | (d) <i>Cohort study</i> —If applicable, explain how loss to follow-up was addressed<br><i>Case-control study</i> —If applicable, explain how matching of cases and controls was addressed<br><i>Cross-sectional study</i> —If applicable, describe analytical methods taking account of sampling strategy                                                                                                                                                              | Page 5   |
|                          |         | (e) Describe any sensitivity analyses                                                                                                                                                                                                                                                                                                                                                                                                                                  | Page 5   |

1  
2  
3  
4  
5  
6  
7  
8  
9  
10  
11  
12  
13  
14  
15  
16  
17  
18  
19  
20  
21  
22  
23  
24  
25  
26  
27  
28  
29  
30  
31  
32  
33  
34  
35  
36  
37  
38  
39  
40  
41  
42  
43  
44  
45  
46  
47  
48  
49  
50  
51  
52  
53  
54  
55  
56  
57  
58  
59  
60

| <b>Results</b>           |     |                                                                                                                                                                                                              |          |
|--------------------------|-----|--------------------------------------------------------------------------------------------------------------------------------------------------------------------------------------------------------------|----------|
| Participants             | 13* | (a) Report numbers of individuals at each stage of study—eg numbers potentially eligible, examined for eligibility, confirmed eligible, included in the study, completing follow-up, and analysed            | Page 6   |
|                          |     | (b) Give reasons for non-participation at each stage                                                                                                                                                         | Page 6   |
|                          |     | (c) Consider use of a flow diagram                                                                                                                                                                           | Figur1   |
| Descriptive data         | 14* | (a) Give characteristics of study participants (eg demographic, clinical, social) and information on exposures and potential confounders                                                                     | Table1   |
|                          |     | (b) Indicate number of participants with missing data for each variable of interest                                                                                                                          | Table2   |
|                          |     | (c) <i>Cohort study</i> —Summarise follow-up time (eg, average and total amount)                                                                                                                             | Page6    |
| Outcome data             | 15* | <i>Cohort study</i> —Report numbers of outcome events or summary measures over time                                                                                                                          | Page6    |
|                          |     | <i>Case-control study</i> —Report numbers in each exposure category, or summary measures of exposure                                                                                                         |          |
|                          |     | <i>Cross-sectional study</i> —Report numbers of outcome events or summary measures                                                                                                                           |          |
| Main results             | 16  | (a) Give unadjusted estimates and, if applicable, confounder-adjusted estimates and their precision (eg, 95% confidence interval). Make clear which confounders were adjusted for and why they were included | Table3-5 |
|                          |     | (b) Report category boundaries when continuous variables were categorized                                                                                                                                    | Page7    |
|                          |     | (c) If relevant, consider translating estimates of relative risk into absolute risk for a meaningful time period                                                                                             |          |
| Other analyses           | 17  | Report other analyses done—eg analyses of subgroups and interactions, and sensitivity analyses                                                                                                               |          |
| <b>Discussion</b>        |     |                                                                                                                                                                                                              |          |
| Key results              | 18  | Summarise key results with reference to study objectives                                                                                                                                                     | Page8    |
| Limitations              | 19  | Discuss limitations of the study, taking into account sources of potential bias or imprecision. Discuss both direction and magnitude of any potential bias                                                   | Page10   |
| Interpretation           | 20  | Give a cautious overall interpretation of results considering objectives, limitations, multiplicity of analyses, results from similar studies, and other relevant evidence                                   | Page10   |
| Generalisability         | 21  | Discuss the generalisability (external validity) of the study results                                                                                                                                        | Page10   |
| <b>Other information</b> |     |                                                                                                                                                                                                              |          |
| Funding                  | 22  | Give the source of funding and the role of the funders for the present study and, if applicable, for the original study on which the present article is based                                                | Page11   |

\*Give information separately for cases and controls in case-control studies and, if applicable, for exposed and unexposed groups in cohort and cross-sectional studies.

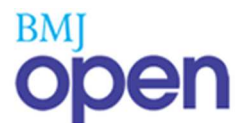

**Interaction of sleep quality and sleep duration on impaired fasting glucose: A population-based cross-sectional survey in China**

|                                 |                                                                                                                   |
|---------------------------------|-------------------------------------------------------------------------------------------------------------------|
| Journal:                        | <i>BMJ Open</i>                                                                                                   |
| Manuscript ID:                  | bmjopen-2013-004436.R1                                                                                            |
| Article Type:                   | Research                                                                                                          |
| Date Submitted by the Author:   | 27-Jan-2014                                                                                                       |
| Complete List of Authors:       | Lou, Peian<br>Chen, Peipei<br>Zhang, Lei<br>Zhang, Pan<br>Chang, Guiqiu<br>Zhang, Ning<br>Li, Ting<br>Qiao, Cheng |
| <b>Primary Subject Heading</b>: | Diabetes and endocrinology                                                                                        |
| Secondary Subject Heading:      | Epidemiology                                                                                                      |
| Keywords:                       | DIABETES & ENDOCRINOLOGY, General diabetes < DIABETES & ENDOCRINOLOGY, EPIDEMIOLOGY                               |
|                                 |                                                                                                                   |

SCHOLARONE™  
Manuscripts

only

**Interaction of sleep quality and sleep duration on impaired fasting glucose:**

**A population-based cross-sectional survey in China**

**Peian Lou<sup>\*</sup>, Peipei Chen, Lei Zhang, Pan Zhang, Guiqiu Chang, Ning Zhang, Ting Li, Cheng Qiao**

Department of Control and Prevention of Chronic Non-communicable Diseases, Xuzhou  
Center for Disease Control and Prevention, Xuzhou, School of Public Health, Xuzhou  
Medical University, China

**\*Corresponding author:** Peian Lou, phone: 0516-85956785, fax: 0516-89596797

42 West Erhuan Road, Xuzhou City, Jiangsu Province, China

E-mail: lpa82835415@126.com

**Key words:** Interaction; Sleep quality; Sleep duration; Impaired fasting glucose

**Word count:** 2543

For peer review only

## Abstract

**Objectives:** To explore the interactions of sleep quality and sleep duration and their effects on impaired fasting glucose in Chinese adults.

**Design:** Cross-sectional survey.

**Setting:** Community-based investigation in Xuzhou, China.

**Participants:** 15,145 Chinese men and women aged 18–75 years old who fulfilled the inclusion criteria.

**Primary and secondary outcome measures:** The Pittsburgh Sleep Quality Index was used to produce sleep quality categories of good, common and poor. Fasting blood glucose levels were assessed for impaired fasting glucose. Sleep duration was measured by average hours of sleep per night, with categories of <6 h, 6–8 h, and >8 h. The products of sleep and family history of diabetes, obesity and age were added to the logistic regression model to evaluate the additive interaction and relative excess risk of interaction (RERI) on impaired fasting glucose. The attributable proportion (AP) of the interaction and the synergy index (S) were applied to evaluate the additive interaction of two factors. Bootstrap measures were used to calculate 95% confidence intervals (CI) of RERI, AP and S.

**Results:** The prevalence of IFG was greatest in those with poor sleep quality and short sleep duration (OR: 6.37; 95% CI: 4.66–8.67;  $p < 0.001$ ) compared with those who had good sleep quality and 6–8 h sleep duration, after adjusting for confounders. After adjusting for potential confounders, RERI, AP and S values (and their 95% CI) were 1.69 (0.31–3.76), 0.42 (0.15–0.61) and 2.85 (2.14–3.92) for the interaction between poor sleep quality and short sleep duration, and 0.78 (0.12–1.43), 0.61 (0.26–0.87) and –0.65 (–0.94 to –0.27) for the interaction between good sleep quality and long sleep duration.

**Conclusions:** The results suggest that there are additive interactions between poor sleep quality and short sleep duration.

## ARTICLE SUMMARY

### Article focus

- To describe the combined effects of sleep duration and sleep quality for impaired fasting glucose in people in Xuzhou, China.

### Key messages

- There exist additive interactions between sleep quality and sleep duration on impaired fasting glucose.

- A strength of the study is the large sample.

- Limitations of the study the cross-sectional design.

## Introduction

1  
2  
3  
4  
5  
6  
7  
8  
9  
10  
11  
12  
13  
14  
15  
16  
17  
18  
19  
20  
21  
22  
23  
24  
25  
26  
27  
28  
29  
30  
31  
32  
33  
34  
35  
36  
37  
38  
39  
40  
41  
42  
43  
44  
45  
46  
47  
48  
49  
50  
51  
52  
53  
54

Prediabetes has a prevalence of 15.5% and affects an estimated 148.2 million Chinese adults.<sup>1</sup> Prediabetes, including impaired fasting glucose (IFG) and impaired glucose tolerance (IGT), is the most important risk factor for type 2 diabetes. The average annual incidence of diabetes in a cohort of patients with IFG is 11% over a six-year period without intervention.<sup>2</sup> Older age, a family history of diabetes, being overweight, obesity, central obesity, increased heart rate, elevated systolic blood pressure, elevated serum triglyceride levels, high income, history of hypertension, history of coronary heart disease, history of drinking, eating pickled foods, and low educational level are significantly associated with an increased risk of prediabetes.<sup>1,3</sup> Increasingly, studies have shown that prediabetes is associated with poor sleep quantity and quality.<sup>3,4</sup> A cross-sectional study has suggested that, compared with those sleeping 7–8 h per night, individuals aged <60 years who slept 5 h or less had an increased odds ratio (OR) for IGT (OR: 1.37, 95% confidence interval [CI]: 1.13–1.67).<sup>4</sup> The Western New York Health Study including 1455 participants showed that sleep duration of less than 6 h was associated with increased prevalence of IFG, compared with those sleeping 6–8 h per night, after adjustment for confounders, over six years of follow up.<sup>5</sup> Spiegel et al. have demonstrated that experimental restriction of sleep to <4 h per night for six nights resulted in an impaired glucose tolerance (IGT) in young healthy adults.<sup>6</sup>

Our previous results suggest that poor quality of sleep and sleep duration <6 h per night are independent risk factors for type 2 diabetes, even after adjusting for a large number of possible confounders.<sup>7,8</sup> Our previous study also confirmed that relatively healthy individuals with poor sleep quality and sleeping times of 6 h or less had a higher risk of IFG, even after adjusting for a large number of confounding factors.<sup>3</sup>

Although these risk factors play a role in the development of type 2 diabetes, the disease is the result of the interaction of genetic and environmental factors. There is little understanding of multivariate explanations of IFG in relatively healthy individuals. To our knowledge, there are no studies on the interaction of sleep quality and sleep duration on IFG in relatively healthy individuals. The primary aim of this cross-sectional study was to examine the combined effects of sleep quality and sleep duration on IFG in relatively healthy individuals in a Chinese primary-care setting. A secondary aim was to assess the associations of sleep quality and IFG, and of sleep duration and IFG.

## Methods

55  
56  
57  
58  
59  
60

The study was a continuation of our previous work.<sup>9</sup> The investigation was conducted from March to November 2012 with a sample size of 15,145 volunteers (7557 men and 7588 women) aged 18 to 75 years. Briefly, the sampling was selected with probability proportional



1  
2  
3  
4  
5  
6  
7  
8  
9  
10  
11  
12  
13  
14  
15  
16  
17  
18  
19  
20  
21  
22  
23  
24  
25  
26  
27  
28  
29  
30  
31  
32  
33  
34  
35  
36  
37  
38  
39  
40  
41  
42  
43  
44  
45  
46  
47  
48  
49  
50  
51  
52  
53  
54  
55  
56  
57  
58  
59  
60

to size from all of the eleven regions in Xuzhou city. In the first stage, 5 subdistricts/townships in urban/rural areas were selected from each region. In the second stage, 5 communities/ villages were selected from each subdistricts/townships. In the final stage, one person who was at least 18 years old and lived in the current residence for at least 5 years was selected from each household using a Kish selection table. A total of 16500 people were selected assuming an estimation prevalence of diabetes of 5.5% with 90% power and  $\alpha=0.05$  and allowing for a drop-out of 10%. All volunteers received a health check and completed a structured questionnaire covering demographic information, medical history, medication history, sleep assessment, and smoking, alcohol drinking and exercise habits. All volunteers underwent 12-h overnight fasting and blood sampling for basic fasting plasma glucose (FPG). After blood sampling, each volunteer completed the Pittsburgh Sleep Quality Index (PSQI).<sup>10</sup> We excluded volunteers who were pregnant, had received antihypertensive medication, or were suffering from any cardiovascular disease, stroke, neuropathy, psychosis, depression, chronic obstructive pulmonary disease, obstructive sleep apnea, diabetes, ache, or any other disease. Those who had missing information on sleep duration or sleep quality were also excluded. Trained physicians and public health workers conducted face-to-face interviews using a standardized questionnaire to collect socio-demographic, lifestyle and health-related information.

The study protocol was approved by the Xuzhou Center for Disease Control and Prevention. All participants provided written informed consent.

### Key measurements

The FPG was determined by morning blood samples obtained by venipuncture after an overnight fast of at least 12h, and extracted plasma was stored at  $-70^{\circ}\text{C}$  for later glucose determination by the hexokinase method. According to the current WHO definition of IFG<sup>11</sup>.

The PSQI is a validated self-rated questionnaire that assesses sleep quality over a one-month time interval.<sup>10</sup> Nineteen items generate seven component scores that reflect sleep problems in the areas of subjective sleep quality, sleep latency, sleep duration, habitual sleep efficiency, sleep disturbances, use of sleep medications and daytime dysfunction. The sum of the scores for these seven components produces a global sleep quality score within a range of 0–21 points. A global PSQI score  $>5$  has a diagnostic sensitivity of 89.6% and specificity of 86.5% in differentiating poor from good sleepers. The Chinese version of the PSQI used with

For peer review only - <http://bmjopen.bmj.com/site/about/guidelines.xhtml>

1 permission from the original PSQI authors, has an overall reliability coefficient of 0.82–0.83  
2 and acceptable test–retest reliability, with a coefficient of 0.77–0.85.<sup>12</sup> Accordingly, in this  
3 study design, a PSQI score  $\leq 5$  was also conventionally defined as ‘good sleep quality’, , and a  
4 PSQI score  $> 5$  was defined as ‘poor sleep quality’  
5

6 Self-reported sleep measures of chronic sleep. Two variables were used to evaluate degree  
7 of “chronic sleep restriction” by estimating average nightly sleep duration: (i) “usual sleep”  
8 (from questionnaires) and (ii) “average nightly sleep” (from sleep diaries). Sleep quantity was  
9 categorized as  $<6$ ,  $6-8$ , and  $>8$  h per night accordance with our previous study.<sup>3,7,8</sup>  
10  
11  
12

### 13 **Covariates**

14 Age, gender, current employment status, level of education, cigarette smoking, alcohol  
15 intake, physical activity, family history of diseases including diabetes, hypertension, heart  
16 disease, and cancer were assessed using a standardized questionnaire. Employment status was  
17 categorized as manual, non-manual, unemployed, and retired. Education was categorized into  
18 below high school, high school, or above high school education. Lifestyle variables included  
19 cigarette smoking, alcohol drinking and physical activity level. Cigarette smoking was  
20 defined as having smoked at least 100 cigarettes in a lifetime. Information was obtained on  
21 the amount and type of alcohol that was consumed during the previous year, and alcohol  
22 drinking was defined as the consumption of at least 30 g of alcohol per week for one year or  
23 more. Regular leisure-time physical activity was defined as participating in moderate or  
24 vigorous activity for no less than 30 minutes per day at least three days a week. Each  
25 volunteer’s body height (to the nearest 0.1 cm) and weight (to the nearest 0.1 kg) in light  
26 indoor clothing were measured. Body mass index (BMI; in  $\text{kg}/\text{m}^2$ ) was calculated. BMI was  
27 categorized as underweight ( $<18.5 \text{ kg}/\text{m}^2$ ), normal weight ( $18.5-24.0 \text{ kg}/\text{m}^2$ ) and  
28 overweight/obese ( $>24.0 \text{ kg}/\text{m}^2$ ).<sup>13</sup>  
29  
30  
31  
32  
33  
34  
35  
36  
37  
38  
39  
40  
41  
42

### 43 **Statistical analysis**

44 Statistical analysis was performed on a computer, using the statistical analysis program  
45 SPSS 13.0 (SPSS, Chicago, IL, USA). Mean differences of continuous variables between  
46 groups were tested using analysis of variance (ANOVA). The chi-squared test was used to  
47 calculate the difference in proportions between groups. Logistic regression analysis was  
48 performed to estimate the probability of having IFG and 95% CI for each risk factor category  
49 stratified by sleep quality and sleep duration, adjusting for age, residential areas, occupation,  
50 education and income levels, leisure-time physical activity, smoking status, drinking status  
51 and hypertension status. The observed prevalences of IFG were plotted and stratified by sleep  
52 quality and sleep duration.  
53  
54  
55  
56  
57  
58  
59

60 Biological interactions should be based on the sum of the scale rather than multiplying  
the scale.<sup>14,15</sup> Therefore, we used three measures to estimate biological interactions of poor

1 sleep quality and short sleep duration: relative excess risk owing to interaction (RERI), the  
2 attributable proportion (AP) owing to interaction, and the synergy index (S). The RERI is the  
3 excess risk attributed to interaction relative to the risk without exposure to poor sleep quality  
4 and short sleep duration. AP refers to the attributable proportion of disease caused by  
5 interaction in subjects with exposure to both variables. S is the excess risk from exposure to  
6 both variables when there is a biological interaction relative to the risk from exposure to both  
7 variables without interaction. In the absence of additive interactions, RERI and AP are equal  
8 to 0.<sup>16</sup> In the current study,  $RERI > 0$ ,  $AP > 0$  and  $S > 0$  indicate statistical significance. A  $p$   
9 value  $< 0.05$  (two-tailed) was considered statistically significant.  
10  
11  
12  
13  
14

## 15 Results

### 16 General characteristics of participants

17  
18  
19  
20  
21 The response rate was 91.3%. Of the 16584 initial participants, 125 did not respond to the  
22 sleep items or blood glucose, 1314 did not meet our study criteria, 15,145 adults (7557 men  
23 and 7588 women) with complete data were included in our analysis. The average sleep  
24 duration per night was  $7.16 \pm 1.06$ h. The average age was  $47.6 \pm 15.1$  years. Among them,  
25 634 had IFG; the remainder had normal glucose tolerance (NGT). The characteristics of the  
26 study population are presented in Table 1. The proportion of volunteers with poor sleep  
27 quality was 26.0%, the proportion with sleep duration  $< 6$  h was 12.5%, the proportion with  
28 sleep duration  $> 8$  h was 12.3%. The 6.7% prevalence of IFG in volunteers with poor sleep  
29 quality was higher than that in volunteers with good sleep quality ( $\chi^2 = 85.98$ ,  $p < 0.001$ ).  
30 Individuals with sleep duration  $< 6$  h had a higher IFG prevalence compared with individuals  
31 with sleep duration 6–8 h, (7.3 vs 3.3%;  $\chi^2 = 72.20$ ,  $p < 0.001$ ). Individuals with sleep  
32 duration  $> 8$  h also had also had higher prevalence of IFG (6.2 vs 3.3%;  $\chi^2 = 37.78$ ,  $p < 0.001$ ).  
33  
34  
35  
36  
37  
38  
39  
40  
41

### 42 Comparison of PSQI scores between the volunteers with IFG and NGT

43  
44 Volunteers with IFG had significantly higher global PSQI scores than those with NGT. For  
45 all PSQI items except sleep duration, there were significant differences ( $p < 0.05$ ) in PSQI  
46 scores between the two groups (Table 2) even after adjusted age.  
47  
48

### 49 The association of sleep time and quality with IFG

50  
51 Individuals with short sleep duration or long sleep duration had significantly increased risk of  
52 IFG compared with those with good sleep quality and sleep duration 6–8 h (OR: 2.16; 95%  
53 CI: 1.33–3.47; OR: 1.89; 95% CI: 1.50–2.34; respectively. all  $P < 0.001$ ), after adjusting for  
54 confounders (See table 3). Individuals with poor sleep quality had significantly increased risk  
55 of IFG compared with those with good sleep quality (OR: 1.98; 95% CI: 1.69–2.21;  $P < 0.001$ ),  
56 after adjusting for confounders (See table 3).  
57  
58  
59  
60

### 61 Biological interaction of sleep quality and sleep duration on the prevalence of IFG

We used a combined effects method to assess interaction, with the  $p$  value of the interaction term indicating statistical significance of additive interactions. Individuals with poor sleep quality or short sleep duration had significantly increased risk of IFG compared with those with good sleep quality and sleep duration 6–8 h (OR: 2.48; 95% CI: 2.12–3.03; OR: 2.79; 95% CI: 2.19–3.58; respectively. all  $P < 0.001$ ), after adjusting for confounders. Table 4 shows the results from the multiple logistic regression models. The prevalence of IFG was greatest in those with poor sleep quality and short sleep duration (OR: 6.37; 95% CI: 4.66–8.67;  $p < 0.001$ ), after adjusting for confounders. In addition, individuals with long sleep duration had a significantly increased risk of IFG compared with those who had good sleep quality and sleep duration of 6–8 h (OR: 2.37; 95% CI: 1.89–2.96;  $p < 0.001$ ), after adjusting for confounders. The prevalence of IFG was also greater in those with good sleep quality with long sleep duration (OR: 3.17; 95% CI: 2.29–4.41;  $p < 0.001$ ), compared with those with 6–8 h sleep duration, after adjusting for confounders.

### Sensitivity analysis

There was a strong additive interaction between poor sleep quality and short sleep duration (RERI: 1.69; 95% CI: 0.31–3.76.), with 42% of occurring IFG attributed to the interaction between poor sleep quality and short sleep duration (Table 5). There was also interaction between good sleep quality and long sleep duration (RERI: 0.78; 95% CI: 0.12–1.43), with 61% of occurring IFG attributed to the interaction between good sleep quality and long sleep duration (Table 5).

### Discussion

The two main findings of this study were, firstly, that there is combined interaction of poor sleep quality and short sleep duration on the prevalence of IFG. Secondly, that total PSQI scores of volunteers with IFG were higher than those of volunteers with NGT. We also found that poor sleep quality and short or long sleep duration increased risk for IFG in a Chinese population, independent of potential confounders such as age, obesity, family history of diabetes, alcohol consumption, smoking, physical activity, and other diseases.

Numerous epidemiologic studies have demonstrated associations between short or long sleep duration and sleep disturbances and diabetes.<sup>17–23</sup> However, few articles focused on IFG, and the results of these are inconsistent.<sup>5,24</sup> Rafalson et al.<sup>5</sup> reported the OR of IFG among short sleepers was 3.0 (95% CI: 1.05–8.59) compared with mid-range sleepers with multivariate conditional logistic regression after adjustment for several diabetes risk factors. Hung et al.<sup>24</sup> reported no association between IFG and poor sleepers. Our findings are consistent with the report by Rafalson et al.

The global PSQI scores in volunteers with IFG were higher than those in volunteers with

1 NGT, which was consistent with the Hung et al. report.<sup>24</sup> However, there was no difference in  
2 sleep duration scores between the volunteers with IFG and the volunteers with NGT. This  
3 could be attributed to the fact that 18.3% (116/634) of the volunteers with IFG were long  
4 sleepers, while short sleepers with IFG only accounted for 22.9% (145/634).  
5

6 Short sleep duration increases appetite. After four nights of 4.5 h in bed, compared with  
7 after four nights of 8.5 h in bed, caloric intake, especially of carbohydrate-rich nutrients,  
8 increased by 14% in young normal-weight men and women.<sup>25,26</sup> Middle-aged obese  
9 volunteers submitted to four to five nights of restriction of their habitual sleep schedule by  
10 2–3 h/night ate 15% more calories than those whose habitual sleep schedule was extended by  
11 the same amount.<sup>27</sup> In volunteers with sleep debt, glucose tolerance, glucose effectiveness and  
12 insulin sensitivity are decreased, and beta-cell function is reduced.<sup>6,26,28,29</sup> Sleep loss also  
13 results in decreased anorexigenic leptin levels,<sup>30-32</sup> especially in volunteers with chronic sleep  
14 restriction.<sup>33</sup> Observational epidemiologic studies have also shown reduced leptin levels, after  
15 controlling for BMI or adiposity, in habitual short sleepers.<sup>33,34</sup> Conversely, leptin deficiency  
16 disrupts sleep architecture and impairs sleep consolidation.<sup>35</sup> Taken together, these data  
17 suggest that sleep loss is likely to have a profound impact on IFG.  
18  
19  
20  
21  
22  
23  
24  
25

26 Poor sleep quality, independent of sleep duration, impairs glucose regulation in healthy  
27 young adults.<sup>36,37</sup> After three nights of slow-wave sleep suppression, insulin sensitivity is  
28 decreased by ~25%, reaching the level reported in older adults and in populations at high risk  
29 of diabetes.<sup>38</sup> The decrease in insulin sensitivity is not compensated for by an increase in  
30 insulin release. Consequently, the disposition index is ~20% lower. Consistent with an  
31 increased diabetes risk, glucose tolerance is reduced by ~23% reaching the range typical of  
32 older adults with impaired glucose tolerance.<sup>37</sup> Sleep fragmentation also increases  
33 sympathetic activity, which in turn leads to disorders of glucose metabolism.<sup>39</sup>  
34  
35  
36  
37  
38  
39

40 Taken together, short sleep duration, increased caloric intake, poor sleep quality,  
41 decreased leptin levels, decreased insulin sensitivity and increased sympathetic activity affect  
42 each other, creating a vicious circle, which elevates the risk of IFG.  
43  
44

45 Despite the absence of the synergistic effect of good-quality sleep with long sleep  
46 duration, a strong association of IFG with long sleep duration in individuals was observed,  
47 suggesting an independent effect of long sleep duration.  
48

49 This study had several potential limitations. Firstly, because of the cross-sectional design,  
50 we could not determine a causal relationship between sleep quality, sleep duration and IFG.  
51 Secondly, we were not able to control for some important and well-known risk factors of  
52 diabetes, for example, snoring.<sup>40</sup> Thirdly, we did not measure poor diet, which is causally  
53 related to type 2 diabetes and may also influence sleep patterns.<sup>41,42</sup>  
54  
55  
56  
57

58 There are several notable strengths of this study. Participants were randomly selected  
59 from the general population of Xuzhou. In addition, the sample was large. Many confounding  
60 risk factors were adjusted for.

1 In summary, volunteers who experience short sleep durations are six times more likely to  
2 develop IFG than those whose average sleep was 6–8 h a night with good sleep quality. The  
3 joint effect of short sleep duration and poor sleep quality was positive.  
4  
5

### 6 **Acknowledgments**

7 This research was funded by the Preventive Medicine research projects of Jiangsu Province  
8 Health Department in 2012 (Y2012025) and the Science and Technology projects of Xuzhou  
9 City in 2011 (XF11C090). Double-Hundred Talents Project of Xuzhou city in  
10 2012(BRA201224)  
11  
12  
13  
14

### 15 **Conflict of Interest Statement**

16 None of the authors have a financial relationship with a commercial entity that has an interest  
17 in the subject of this manuscript. The researchers were independent from funders. The study  
18 funders had no influence on the study design, data collection, analysis, interpretation of data,  
19 writing of the report, or decision to submit the article for publication.  
20  
21  
22  
23  
24  
25

26 **Contributors** Steering Committee: PL (principal investigator), PC (principal investigator),  
27 PC and LZ. Operating Committee: LZ,PZ, GC, NZ, TL and CQ.  
28

### 29 **Data Sharing Statement**

30 Our material is original, has not been published except in abstract form, and is not being  
31 considered for publication elsewhere, including publicly accessible websites or e-print servers,  
32 no part of the research presented has been funded by tobacco industry sources, and all authors  
33 have read the manuscript and approve its submission.  
34  
35  
36  
37  
38  
39  
40  
41  
42  
43  
44  
45  
46  
47  
48  
49  
50  
51  
52  
53  
54  
55  
56  
57  
58  
59  
60



## References

1. Yang W, Lu J, Weng J, et al. China National Diabetes and Metabolic Disorders Study Group. Prevalence of diabetes among men and women in China. *N Engl J Med* 2010; 362:1090-1 101.
2. Li G, Zhang P, Wang J, et al. The long-term effect of lifestyle interventions to prevent diabetes in the China Da Qing Diabetes Prevention Study: a 20-year follow-up study. *Lancet* 2008; 24;371(9626):1783-9.
3. Lou P, Chen P, Yu J, et al. Analysis on the risk factors of the residents with impaired fasting glucose in Xuzhou. *Chin J Dis Control Prev* 2011; 15( 3) : 192-195. (In Chinese)
4. Najafian J, Mohamadifard N, Siadat ZD, et al. Association between sleep duration and diabetes mellitus: Isfahan Healthy Heart Program. *Niger J Clin Pract* 2013; 16(1):59-62.
5. Rafalson L, Donahue RP, Stranges S, et al. Short sleep duration is associated with the development of impaired fasting glucose: the Western New York Health Study. *Ann Epidemiol* 2010; 20(12):883-9.
6. Spiegel K, Leproult R, Van Cauter E. Impact of sleep debt on metabolic and endocrine function. *Lancet* 1999; 354:1435-9.
7. Lou P, Chen P, Zhang L, et al. Relation study of sleep quality and sleep duration to type 2 diabetes: a population-based cross-sectional survey. *BMJ Open* 2012; 2:e000956.13.
8. Wu H, Lou P, Chen P, et al. survey the relationship between sleep quality and T2DM. *Chin J Diabetes* 2013; 21(4): 330-333. (In Chinese)
9. Chen P, Lou P, Yu J, et al. Risk factors of diabetes mellitus of residents living in Xuzhou city. *Chin J Health Manage* 2010; 4:78-80. (In Chinese)
10. Buysse DJ, Reynolds CF 3rd, Monk TH, et al. The Pittsburgh Sleep Quality Index: a new instrument for psychiatric practice and research. *Psychiatry Res* 1989; 28(2): 193–213.
11. Diagnosis and classification of diabetes mellitus. *Diabetes Care*, 2010. 33 Suppl 1: p. S62-9
12. Tsai, PS, Wang, SY, Wang, MY, et al. Psychometric evaluation of the Chinese version of the Pittsburgh Sleep Quality Index (CPSQI) in primary insomnia and control subjects. *Qual Life Res* 2005; 14(8):1943–1952.



- 1  
2  
3  
4  
5  
6  
7  
8  
9  
10  
11  
12  
13  
14  
15  
16  
17  
18  
19  
20  
21  
22  
23  
24  
25  
26  
27  
28  
29  
30  
31  
32  
33  
34  
35  
36  
37  
38  
39  
40  
41  
42  
43  
44  
45  
46  
47  
48  
49  
50  
51  
52  
53  
54  
55  
56  
57  
58  
59  
60
13. Haseli-Mashhadi N, Dadd T, Pan A, et al. Sleep quality in middle-aged and elderly Chinese: distribution, associated factors and associations with cardio-metabolic risk factors. *BMC Public Health* 2009; 9:130.
14. Rothman KJ, Greenland S, Lash T L. *Modern epidemiology*, 3rd edition [M]. Philadelphia: Lippincott Williams & Wilkins,2008.
15. Hosmer DW, Lemeshow S . Confidence interval estimation of interaction. *Epidemiology* 1992; 3(5):452-456.
16. Knol MJ, VanderWeele TJ, Groenwold RHH, et al. Estimating measures of interaction on an additive scale for preventive exposures. *Eur J Epidemiol* 2011; 26(6):433–438.
17. Gottlieb DJ, Punjabi NM, Newman AB, et al. Association of sleep time with diabetes mellitus and impaired glucose tolerance. *Arch Intern Med* 2005 ;165: 863–868.
18. Yaggi HK, Araujo AB, McKinlay JB. Sleep duration as a risk factor for the development of type 2 diabetes. *Diabetes Care* 2006; 29: 657-661
19. Hayashino Y, Fukuhara S, Suzukamo Y, et al. Relation between sleep quality and quantity, quality of life, and risk of developing diabetes in healthy workers in Japan: the High-risk and Population Strategy for Occupational Health Promotion (HIPOP-OHP) Study. *BMC Public Health* 2007;7: 129.
20. Shankar A, Syamala S, Kalidindi S. Insufficient Rest or Sleep and Its Relation to Cardiovascular Disease, Diabetes and Obesity in a National, Multiethnic Sample. *PLoS ONE* 2010; 5(11): e14189.
21. Mallon L, Broman JE, Hetta J. High Incidence of Diabetes in Men With Sleep Complaints or Short Sleep Duration -A 12-year follow-up study of a middle-aged population. *Diabetes Care* 2005;28:2762–2767.
22. Nilsson PM, RÖÖst M, Engström M , et al. Incidence of Diabetes in Middle-Aged Men Is Related to Sleep Disturbances. *Diabetes Care* 2004;27:2464–2469.
23. Vgontzas AN, Liao D, Pejovic S, et al. Insomnia With Objective Short Sleep Duration Is Associated With Type 2 Diabetes : A population-based study. *Diabetes Care* 2009;32:1980–1985

- 1  
2  
3  
4  
5  
6  
7  
8  
9  
10  
11  
12  
13  
14  
15  
16  
17  
18  
19  
20  
21  
22  
23  
24  
25  
26  
27  
28  
29  
30  
31  
32  
33  
34  
35  
36  
37  
38  
39  
40  
41  
42  
43  
44  
45  
46  
47  
48  
49  
50  
51  
52  
53  
54  
55  
56  
57  
58  
59  
60
24. Hung HC, Yang YC, Ou HY, et al. The relationship between impaired fasting glucose and self-reported sleep quality in a Chinese population. *Clin Endocrinol (Oxf)* 2013;78(4):518-24.
25. Tasali E, Leproult R, Spiegel K. Reduced sleep duration or quality: relationships with insulin resistance and type 2 diabetes. *Prog Cardiovasc Dis* 2009; 51:381–391.
26. Nedeltcheva AV, Kessler L, Imperial J, et al. Exposure to recurrent sleep restriction in the setting of high caloric intake and physical inactivity results in increased insulin resistance and reduced glucose tolerance. *J Clin Endocrinol Metabol* 2009; 94:3242–3250.
27. Morselli L, Balbo M, Van Cauter E, et al. Impact of sleep restriction on the regulation of appetite in middle-aged obese subjects. 4th International World Sleep Congress; Quebec City, Québec. 2011.
28. Buxton OM, Pavlova M, Reid EW, et al. Sleep restriction for 1 week reduces insulin sensitivity in healthy men. *Diabetes* 2010; 59:2126–2133.
29. Simpson NS, Banks S, Dinges DF. Sleep restriction is associated with increased morning plasma leptin concentrations, especially in women. *Biol Res Nurs* 2010; 12:47–53.
30. Guilleminault C, Powell NB, Martinez S, et al. Preliminary observations on the effects of sleep time in a sleep restriction paradigm. *Sleep Med.* 2003; 4:177–184.
31. Spiegel K, Leproult R, L'hermite-Balériaux M, et al. Leptin levels are dependent on sleep duration: relationships with sympathovagal balance, carbohydrate regulation, cortisol, and thyrotropin. *J Clin Endocrinol Metabol* 2004; 89(11):5762–5771.
32. Spiegel K, Tasali E, Penev P, et al. Sleep curtailment in healthy young men is associated with decreased leptin levels, elevated ghrelin levels, and increased hunger and appetite. *Ann Intern Med* 2004; 141:846–850.
33. Taheri S, Lin L, Austin D, et al. Short sleep duration is associated with reduced leptin, elevated ghrelin, and increased body mass index. *PLoS Med* 2004; 1:e62.
34. Chaput JP, Despres JP, Bouchard C, et al. Short sleep duration is associated with reduced leptin levels and increased adiposity: results from the Quebec family study. *Obesity* (Silver Spring, Md) 2007; 15:253–261.

- 1  
2  
3  
4  
5  
6  
7  
8  
9  
10  
11  
12  
13  
14  
15  
16  
17  
18  
19  
20  
21  
22  
23  
24  
25  
26  
27  
28  
29  
30  
31  
32  
33  
34  
35  
36  
37  
38  
39  
40  
41  
42  
43  
44  
45  
46  
47  
48  
49  
50  
51  
52  
53  
54  
55  
56  
57  
58  
59  
60
- 35 Laposky AD, Shelton J, Bass J, et al. Altered sleep regulation in leptin-deficient mice. *Am J Physiol Regul Integr Comp Physiol* 2006; 290:R894–R903.
36. Stamatakis KA, Punjabi NM. Effects of sleep fragmentation on glucose metabolism in normal subjects. *Chest* 2010; 137:95–101.
37. Tasali E, Leproult R, Ehrmann DA, et al. Slow-wave sleep and the risk of type 2 diabetes in humans. *Proc Natl Acad Sci USA* 2008; 105:1044–1049.
38. Bergman RN. Lilly lecture 1989. Toward physiological understanding of glucose tolerance. Minimal-model approach. *Diabetes* 1989; 38:1512–1527
39. Peltier AC, Consens FB, Sheikh K, et al. Autonomic dysfunction in obstructive sleep apnea is associated with impaired glucose regulation. *Sleep Medicine* 2007.8(2): 149–155.
40. Al-Delaimy WK, Manson JE, Willett WC, et al. Snoring as a risk factor for type II diabetes mellitus: a prospective study. *Am J Epidemiol* 2002 ;155:387–393,
41. Tonstad SMD, Butler T, Yan R, et al. Type of Vegetarian Diet, Body Weight, and Prevalence of Type 2 Diabetes. *Diabetes Care* 2009;32(8):791-796.
42. Grandner MA, Kripke DF, Naidoo N, et al. Linger Relationships among dietary nutrients and subjective sleep, objective sleep, and napping in women. *Sleep Med* 2010; 11: 180.

**Table 1** Baseline characteristics of the study population (N = 15,145)

| Reported variable                 | All       | IFG            |             |        |
|-----------------------------------|-----------|----------------|-------------|--------|
|                                   |           | No             | Yes         | P      |
|                                   | 15145     | 14,511(95.81%) | 634(4.19%)  |        |
| Age(years)                        | 47.6±15.1 | 47.4±14.7      | 52.2±16.2   | 8.012  |
| ≥45 years                         | 8362      | 7928(94.81%)   | 434(5.19%)  | 0.000  |
| Sex(% man)                        | 49.9      | 50.0           | 49.8        | 0.938  |
| Rural (%)                         | 72.4      | 72.4           | 72.9        | 0.795  |
| Manual                            | 10833     | 10359(95.62%)  | 474(4.38%)  | 0.023  |
| Non-manual                        | 1045      | 1016(97.22%)   | 29(2.78%)   |        |
| Unemployed                        | 677       | 658(97.19%)    | 19(2.81%)   |        |
| retired                           | 2590      | 2478(95.68%)   | 112(4.32%)  |        |
| Married (living with partners)(%) | 88.5      | 88.6           | 86.3        | 0.073  |
| Below high school                 | 11899     | 11400(95.81%)  | 499(4.19%)  | 0.986  |
| high school                       | 1760      | 1686(95.80%)   | 74(4.20%)   |        |
| Above high school                 | 1486      | 1425(95.90%)   | 61(4.10%)   |        |
| smoker                            | 3541      | 3367(95.09%)   | 174(4.91%)  | 0.014  |
| alcohol use                       | 2872      | 2752(95.82%)   | 120(4.18%)  | 0.981  |
| Regular exercise                  | 2559      | 2452(95.82%)   | 107(4.18%)  | 0.989  |
| Family history of diabetes        | 483       | 362(74.95%)    | 121(25.05%) | 0.000  |
| BMI, mean(SD)                     | 23.9±4.7  | 23.8±5.8       | 25.2±4.1    | <0.001 |
| Central obesity                   | 4613      | 4219(91.46%)   | 394(8.54%)  | 0.000  |
| Hypertension                      | 3060      | 2901(94.80%)   | 159(5.20%)  | 0.002  |
| Sleep duration(hour)              |           |                |             |        |
| ≤6                                | 1984      | 1839(92.70%)   | 145(7.30%)  | 0.000  |
| 6-8                               | 11292     | 10919(96.70%)  | 373(3.30%)  |        |
| ≥8                                | 1869      | 1753(93.80%)   | 116(6.20%)  |        |
| Sleep quality                     |           |                |             |        |
| Good                              | 11209     | 10840(96.71%)  | 369(3.29%)  | 0.000  |
| Poor                              | 3936      | 3671(93.27%)   | 265(6.73%)  |        |

**Table 2** Comparison of Pittsburgh Sleep Quality Index scores between individuals with impaired fasting glucose and controls ( $\bar{x}$   $\pm$  sd)

| <i>Items</i>             | <i>IFG</i>        |                   | <i>F value</i> | <i>P</i> |
|--------------------------|-------------------|-------------------|----------------|----------|
|                          | No                | Yes               |                |          |
| Subjective sleep quality | 0.415 $\pm$ 0.013 | 0.463 $\pm$ 0.03  | 31.823         | 0.000    |
| Sleep latency            | 0.742 $\pm$ 0.004 | 0.800 $\pm$ 0.016 | 27.446         | 0.000    |
| Sleep duration           | 0.152 $\pm$ 0.002 | 0.159 $\pm$ 0.001 | 0.503          | 0.478    |
| Sleep efficiency         | 0.444 $\pm$ 0.003 | 0.321 $\pm$ 0.001 | 29.452         | 0.000    |
| Sleep disturbance        | 0.591 $\pm$ 0.003 | 0.658 $\pm$ 0.012 | 28.259         | 0.000    |
| Use of hypnotic          | 0.051 $\pm$ 0.002 | 0.065 $\pm$ 0.007 | 16.651         | 0.000    |
| Daytime dysfunction      | 0.147 $\pm$ 0.011 | 0.170 $\pm$ 0.002 | 9.725          | 0.000    |
| Global PSQI scores       | 2.302 $\pm$ 0.009 | 2.495 $\pm$ 0.041 | 20.957         | 0.000    |

Using analysis of covariance, Covariates for age =47.26 years old

**Table 3** Odds ratios for the association between sleep quality, sleep duration and impaired fasting glucose among participants

| Variables      |      | IFG | No IFG | OR (95%CI)       | P     |
|----------------|------|-----|--------|------------------|-------|
| Sleep quality  | Good | 369 | 10840  | 1                | 0.000 |
|                | Poor | 265 | 3671   | 1.21(1.09-1.34)  |       |
| Sleep duration | 6-8h | 373 | 10919  | 1                | 0.000 |
|                | <6h  | 145 | 1839   | 2.16 (1.33-3.47) |       |
|                | >8h  | 116 | 1753   | 1.89 (1.50-2.34) |       |

Adjusted for age, sex, education, employment, BMI, family history of diabetes, smoking status, alcohol consumption and physical activity.

**Table 4** Odds ratios for the association between sleep quality and impaired fasting glucose by sleep duration among participants

| <i>Sleep duration</i> | <i>Sleep quality</i> | <i>IFG</i> | <i>No IFG</i> | <i>OR (95%CI)</i> | <i>P</i> |
|-----------------------|----------------------|------------|---------------|-------------------|----------|
| 6-8h                  | Good                 | 246        | 8743          | 1                 |          |
|                       | Poor                 | 127        | 2176          | 1.98 (1.76-2.52)  | <0.001   |
| <6h                   | Good                 | 53         | 1329          | 1.38 (1.12-1.61)  | <0.001   |
|                       | Poor                 | 92         | 510           | 6.37 (4.66-8.67)  | <0.001   |
| >8h                   | Good                 | 70         | 768           | 3.17 (2.29-4.41)  | <0.001   |
|                       | Poor                 | 46         | 985           | 1.59 (1.08-2.29)  | <0.001   |

Adjusted for age, sex, education, employment, BMI, family history of diabetes, smoking status, alcohol consumption and physical activity.



**Table 5** Measures for estimation of the biological interaction between sleep quality and sleep duration for the prevalence of impaired fasting glucose in participants

| Measures of biological interaction            | Estimate (95% CI)  |
|-----------------------------------------------|--------------------|
| Poor sleep quality versus sleep duration < 6h |                    |
| RERI                                          | 1.69(0.31–3.76)    |
| AP                                            | 0.42(0.15–0.61)    |
| S                                             | 2.85(2.14–3.92)    |
| Good sleep quality versus sleep duration > 8h |                    |
| RERI                                          | 0.78(0.12–1.43)    |
| AP                                            | 0.61(0.26–0.87)    |
| S                                             | -0.65(-0.94–-0.27) |

Reference group is good sleep quality with 6-8 sleep duration.

Adjusted for age, sex, education, occupation, BMI, family history of diabetes, smoking status, alcohol consumption, and hypertension.

**Interaction of sleep quality and sleep duration on impaired fasting glucose:****A population-based cross-sectional survey in China**

**Peian Lou<sup>\*</sup>, Peipei Chen, Lei Zhang, Pan Zhang, Guiqiu Chang, Ning Zhang, Ting Li, Cheng Qiao**

Department of Control and Prevention of Chronic Non-communicable Diseases, Xuzhou  
Center for Disease Control and Prevention, Xuzhou, **School of Public Health, Xuzhou  
Medical University**, China

**\*Corresponding author:** Peian Lou, phone: 0516-85956785, fax: 0516-89596797

42 West Erhuan Road, Xuzhou City, Jiangsu Province, China

E-mail: lpa82835415@126.com

**Key words:** Interaction; Sleep quality; Sleep duration; Impaired fasting glucose

**Word count: 2543**

## Abstract

**Objectives:** To explore the interactions of sleep quality and sleep duration and their effects on impaired fasting glucose in Chinese adults.

**Design:** Cross-sectional survey.

**Setting:** Community-based investigation in Xuzhou, China.

**Participants:** 15,145 Chinese men and women aged 18–75 years old who fulfilled the inclusion criteria.

**Primary and secondary outcome measures:** The Pittsburgh Sleep Quality Index was used to produce sleep quality categories of good, common and poor. Fasting blood glucose levels were assessed for impaired fasting glucose. Sleep duration was measured by average hours of sleep per night, with categories of <6 h, 6–8 h, and >8 h. The products of sleep and family history of diabetes, obesity and age were added to the logistic regression model to evaluate the additive interaction and relative excess risk of interaction (RERI) on impaired fasting glucose. The attributable proportion (AP) of the interaction and the synergy index (S) were applied to evaluate the additive interaction of two factors. Bootstrap measures were used to calculate 95% confidence intervals (CI) of RERI, AP and S.

**Results:** The prevalence of IFG was greatest in those with poor sleep quality and short sleep duration (OR: 6.37; 95% CI: 4.66–8.67;  $p < 0.001$ ) compared with those who had good sleep quality and 6–8 h sleep duration, after adjusting for confounders. After adjusting for potential confounders, RERI, AP and S values (and their 95% CI) were 1.69 (0.31–3.76), 0.42 (0.15–0.61) and 2.85 (2.14–3.92) for the interaction between poor sleep quality and short sleep duration, and 0.78 (0.12–1.43), 0.61 (0.26–0.87) and –0.65 (–0.94 to –0.27) for the interaction between good sleep quality and long sleep duration.

**Conclusions:** The results suggest that there are additive interactions between poor sleep quality and short sleep duration.

## ARTICLE SUMMARY

### Article focus

- To describe the combined effects of sleep duration and sleep quality for impaired fasting glucose in people in Xuzhou, China.

### Key messages

- There exist additive interactions between sleep quality and sleep duration on impaired fasting glucose.

- A strength of the study is the large sample.

- Limitations of the study the cross-sectional design.

## Introduction

1  
2  
3  
4  
5  
6  
7  
8  
9  
10  
11  
12  
13  
14  
15  
16  
17  
18  
19  
20  
21  
22  
23  
24  
25  
26  
27  
28  
29  
30  
31  
32  
33  
34  
35  
36  
37  
38  
39  
40  
41  
42  
43  
44  
45  
46  
47  
48  
49  
50  
51  
52  
53  
54  
55  
56  
57  
58  
59  
60

Prediabetes has a prevalence of 15.5% and affects an estimated 148.2 million Chinese adults.<sup>1</sup> Prediabetes, including impaired fasting glucose (IFG) and impaired glucose tolerance (IGT), is the most important risk factor for type 2 diabetes. The average annual incidence of diabetes in a cohort of patients with IFG is 11% over a six-year period without intervention.<sup>2</sup> Older age, a family history of diabetes, being overweight, obesity, central obesity, increased heart rate, elevated systolic blood pressure, elevated serum triglyceride levels, high income, history of hypertension, history of coronary heart disease, history of drinking, eating pickled foods, and low educational level are significantly associated with an increased risk of prediabetes.<sup>1,3</sup> Increasingly, studies have shown that prediabetes is associated with poor sleep quantity and quality.<sup>3,4</sup> A cross-sectional study has suggested that, compared with those sleeping 7–8 h per night, individuals aged <60 years who slept 5 h or less had an increased odds ratio (OR) for IGT (OR: 1.37, 95% confidence interval [CI]: 1.13–1.67).<sup>4</sup> The Western New York Health Study including 1455 participants showed that sleep duration of less than 6 h was associated with increased prevalence of IFG, compared with those sleeping 6–8 h per night, after adjustment for confounders, over six years of follow up.<sup>5</sup> Spiegel et al. have demonstrated that experimental restriction of sleep to <4 h per night for six nights resulted in an impaired glucose tolerance (IGT) in young healthy adults.<sup>6</sup>

Our previous results suggest that poor quality of sleep and sleep duration <6 h per night are independent risk factors for type 2 diabetes, even after adjusting for a large number of possible confounders.<sup>7,8</sup> Our previous study also confirmed that relatively healthy individuals with poor sleep quality and sleeping times of 6 h or less had a higher risk of IFG, even after adjusting for a large number of confounding factors.<sup>3</sup>

Although these risk factors play a role in the development of type 2 diabetes, the disease is the result of the interaction of genetic and environmental factors. There is little understanding of multivariate explanations of IFG in relatively healthy individuals. To our knowledge, there are no studies on the interaction of sleep quality and sleep duration on IFG in relatively healthy individuals. The primary aim of this cross-sectional study was to examine the combined effects of sleep quality and sleep duration on IFG in relatively healthy individuals in a Chinese primary-care setting. A secondary aim was to assess the associations of sleep quality and IFG, and of sleep duration and IFG.

## Methods

The study was a continuation of our previous work.<sup>9</sup> The investigation was conducted from March to November 2012 with a sample size of 15,145 volunteers (7557 men and 7588 women) aged 18 to 75 years. Briefly, the sampling was selected with probability proportional

1  
2  
3  
4  
5  
6  
7  
8  
9  
10  
11  
12  
13  
14  
15  
16  
17  
18  
19  
20  
21  
22  
23  
24  
25  
26  
27  
28  
29  
30  
31  
32  
33  
34  
35  
36  
37  
38  
39  
40  
41  
42  
43  
44  
45  
46  
47  
48  
49  
50  
51  
52  
53  
54  
55  
56  
57  
58  
59  
60

to size from all of the eleven regions in Xuzhou city. In the first stage, 5 subdistricts/townships in urban/rural areas were selected from each region. In the second stage, 5 communities/ villages were selected from each subdistricts/townships. In the final stage, one person who was at least 18 years old and lived in the current residence for at least 5 years was selected from each household using a Kish selection table. A total of 16500 people were selected assuming an estimation prevalence of diabetes of 5.5% with 90% power and  $\alpha=0.05$  and allowing for a drop-out of 10%. All volunteers received a health check and completed a structured questionnaire covering demographic information, medical history, medication history, sleep assessment, and smoking, alcohol drinking and exercise habits. All volunteers underwent 12-h overnight fasting and blood sampling for basic fasting plasma glucose (FPG). After blood sampling, each volunteer completed the Pittsburgh Sleep Quality Index (PSQI).<sup>10</sup> We excluded volunteers who were pregnant, had received antihypertensive medication, or were suffering from any cardiovascular disease, stroke, neuropathy, psychosis, depression, chronic obstructive pulmonary disease, obstructive sleep apnea, diabetes, ache, or any other disease. Those who had missing information on sleep duration or sleep quality were also excluded. Trained physicians and public health workers conducted face-to-face interviews using a standardized questionnaire to collect socio-demographic, lifestyle and health-related information.

The study protocol was approved by the Xuzhou Center for Disease Control and Prevention. All participants provided written informed consent.

### Key measurements

The FPG was determined by morning blood samples obtained by venipuncture after an overnight fast of at least 12h, and extracted plasma was stored at  $-70^{\circ}\text{C}$  for later glucose determination by the hexokinase method. According to the current WHO definition of IFG<sup>11</sup>.

The PSQI is a validated self-rated questionnaire that assesses sleep quality over a one-month time interval.<sup>10</sup> Nineteen items generate seven component scores that reflect sleep problems in the areas of subjective sleep quality, sleep latency, sleep duration, habitual sleep efficiency, sleep disturbances, use of sleep medications and daytime dysfunction. The sum of the scores for these seven components produces a global sleep quality score within a range of 0–21 points. A global PSQI score  $>5$  has a diagnostic sensitivity of 89.6% and specificity of 86.5% in differentiating poor from good sleepers. The Chinese version of the PSQI used with

For peer review only - <http://bmjopen.bmj.com/site/about/guidelines.xhtml>

1 permission from the original PSQI authors, has an overall reliability coefficient of 0.82–0.83  
2 and acceptable test–retest reliability, with a coefficient of 0.77–0.85.<sup>12</sup> Accordingly, in this  
3 study design, a PSQI score  $\leq 5$  was also conventionally defined as ‘good sleep quality’, , and a  
4 PSQI score  $> 5$  was defined as ‘poor sleep quality’  
5

6 Self-reported sleep measures of chronic sleep. Two variables were used to evaluate degree  
7 of “chronic sleep restriction” by estimating average nightly sleep duration: (i) “usual sleep”  
8 (from questionnaires) and (ii) “average nightly sleep” (from sleep diaries). Sleep quantity was  
9 categorized as  $<6$ , 6–8, and  $>8$  h per night accordance with our previous study.<sup>3,7,8</sup>  
10  
11  
12  
13

### 14 Covariates

15 Age, gender, current employment status, level of education, cigarette smoking, alcohol  
16 intake, physical activity, family history of diseases including diabetes, hypertension, heart  
17 disease, and cancer were assessed using a standardized questionnaire. Employment status was  
18 categorized as manual, non-manual, unemployed, and retired. Education was categorized into  
19 below high school, high school, or above high school education. Lifestyle variables included  
20 cigarette smoking, alcohol drinking and physical activity level. Cigarette smoking was  
21 defined as having smoked at least 100 cigarettes in a lifetime. Information was obtained on  
22 the amount and type of alcohol that was consumed during the previous year, and alcohol  
23 drinking was defined as the consumption of at least 30 g of alcohol per week for one year or  
24 more. Regular leisure-time physical activity was defined as participating in moderate or  
25 vigorous activity for no less than 30 minutes per day at least three days a week. Each  
26 volunteer’s body height (to the nearest 0.1 cm) and weight (to the nearest 0.1 kg) in light  
27 indoor clothing were measured. Body mass index (BMI; in  $\text{kg}/\text{m}^2$ ) was calculated. BMI was  
28 categorized as underweight ( $<18.5 \text{ kg}/\text{m}^2$ ), normal weight ( $18.5\text{--}24.0 \text{ kg}/\text{m}^2$ ) and  
29 overweight/obese ( $>24.0 \text{ kg}/\text{m}^2$ ).<sup>13</sup>  
30  
31  
32  
33  
34  
35  
36  
37  
38  
39  
40  
41  
42

### 43 Statistical analysis

44 Statistical analysis was performed on a computer, using the statistical analysis program  
45 SPSS 13.0 (SPSS, Chicago, IL, USA). Mean differences of continuous variables between  
46 groups were tested using analysis of variance (ANOVA). The chi-squared test was used to  
47 calculate the difference in proportions between groups. Logistic regression analysis was  
48 performed to estimate the probability of having IFG and 95% CI for each risk factor category  
49 stratified by sleep quality and sleep duration, adjusting for age, residential areas, occupation,  
50 education and income levels, leisure-time physical activity, smoking status, drinking status  
51 and hypertension status. The observed prevalences of IFG were plotted and stratified by sleep  
52 quality and sleep duration.  
53  
54  
55  
56  
57  
58  
59

60 Biological interactions should be based on the sum of the scale rather than multiplying  
the scale.<sup>14,15</sup> Therefore, we used three measures to estimate biological interactions of poor

1 sleep quality and short sleep duration: relative excess risk owing to interaction (RERI), the  
2 attributable proportion (AP) owing to interaction, and the synergy index (S). The RERI is the  
3 excess risk attributed to interaction relative to the risk without exposure to poor sleep quality  
4 and short sleep duration. AP refers to the attributable proportion of disease caused by  
5 interaction in subjects with exposure to both variables. S is the excess risk from exposure to  
6 both variables when there is a biological interaction relative to the risk from exposure to both  
7 variables without interaction. In the absence of additive interactions, RERI and AP are equal  
8 to 0.<sup>16</sup> In the current study,  $RERI > 0$ ,  $AP > 0$  and  $S > 0$  indicate statistical significance. A  $p$   
9 value  $< 0.05$  (two-tailed) was considered statistically significant.  
10  
11  
12  
13  
14

## 15 Results

### 16 General characteristics of participants

17  
18  
19  
20  
21 The response rate was 91.3%. Of the 16584 initial participants, 125 did not respond to the  
22 sleep items or blood glucose, 1314 did not meet our study criteria, 15,145 adults (7557 men  
23 and 7588 women) with complete data were included in our analysis. The average sleep  
24 duration per night was  $7.16 \pm 1.06$ h. The average age was  $47.6 \pm 15.1$  years. Among them,  
25 634 had IFG; the remainder had normal glucose tolerance (NGT). The characteristics of the  
26 study population are presented in Table 1. The proportion of volunteers with poor sleep  
27 quality was 26.0%, the proportion with sleep duration  $< 6$  h was 12.5%, the proportion with  
28 sleep duration  $> 8$  h was 12.3%. The 6.7% prevalence of IFG in volunteers with poor sleep  
29 quality was higher than that in volunteers with good sleep quality ( $\chi^2 = 85.98$ ,  $p < 0.001$ ).  
30 Individuals with sleep duration  $< 6$  h had a higher IFG prevalence compared with individuals  
31 with sleep duration 6–8 h, (7.3 vs 3.3%;  $\chi^2 = 72.20$ ,  $p < 0.001$ ). Individuals with sleep  
32 duration  $> 8$  h also had also had higher prevalence of IFG (6.2 vs 3.3%;  $\chi^2 = 37.78$ ,  $p < 0.001$ ).  
33  
34  
35  
36  
37  
38  
39  
40  
41

### 42 Comparison of PSQI scores between the volunteers with IFG and NGT

43  
44 Volunteers with IFG had significantly higher global PSQI scores than those with NGT. For  
45 all PSQI items except sleep duration, there were significant differences ( $p < 0.05$ ) in PSQI  
46 scores between the two groups (Table 2) even after adjusted age.  
47  
48

### 49 The association of sleep time and quality with IFG

50  
51 Individuals with short sleep duration or long sleep duration had significantly increased risk of  
52 IFG compared with those with good sleep quality and sleep duration 6–8 h (OR: 2.16 ; 95%  
53 CI: 1.33–3.47; OR: 1.89; 95% CI: 1.50–2.34; respectively. all  $P < 0.001$ ), after adjusting for  
54 confounders (See table 3). Individuals with poor sleep quality had significantly increased risk  
55 of IFG compared with those with good sleep quality (OR: 1.98; 95% CI: 1.69–2.21;  $P < 0.001$ ),  
56 after adjusting for confounders (See table 3).  
57  
58  
59  
60

### 61 Biological interaction of sleep quality and sleep duration on the prevalence of IFG



We used a combined effects method to assess interaction, with the  $p$  value of the interaction term indicating statistical significance of additive interactions. Individuals with poor sleep quality or short sleep duration had significantly increased risk of IFG compared with those with good sleep quality and sleep duration 6–8 h (OR: 2.48; 95% CI: 2.12–3.03; OR: 2.79; 95% CI: 2.19–3.58; respectively. all  $P < 0.001$ ), after adjusting for confounders. Table 4 shows the results from the multiple logistic regression models. The prevalence of IFG was greatest in those with poor sleep quality and short sleep duration (OR: 6.37; 95% CI: 4.66–8.67;  $p < 0.001$ ), after adjusting for confounders. In addition, individuals with long sleep duration had a significantly increased risk of IFG compared with those who had good sleep quality and sleep duration of 6–8 h (OR: 2.37; 95% CI: 1.89–2.96;  $p < 0.001$ ), after adjusting for confounders. The prevalence of IFG was also greater in those with good sleep quality with long sleep duration (OR: 3.17; 95% CI: 2.29–4.41;  $p < 0.001$ ), compared with those with 6–8 h sleep duration, after adjusting for confounders.

### Sensitivity analysis

There was a strong additive interaction between poor sleep quality and short sleep duration (RERI: 1.69; 95% CI: 0.31–3.76.), with 42% of occurring IFG attributed to the interaction between poor sleep quality and short sleep duration (Table 5). There was also interaction between good sleep quality and long sleep duration (RERI: 0.78; 95% CI: 0.12–1.43), with 61% of occurring IFG attributed to the interaction between good sleep quality and long sleep duration (Table 5).

### Discussion

The two main findings of this study were, firstly, that there is combined interaction of poor sleep quality and short sleep duration on the prevalence of IFG. Secondly, that total PSQI scores of volunteers with IFG were higher than those of volunteers with NGT. We also found that poor sleep quality and short or long sleep duration increased risk for IFG in a Chinese population, independent of potential confounders such as age, obesity, family history of diabetes, alcohol consumption, smoking, physical activity, and other diseases.

Numerous epidemiologic studies have demonstrated associations between short or long sleep duration and sleep disturbances and diabetes.<sup>17–23</sup> However, few articles focused on IFG, and the results of these are inconsistent.<sup>5,24</sup> Rafalson et al.<sup>5</sup> reported the OR of IFG among short sleepers was 3.0 (95% CI: 1.05–8.59) compared with mid-range sleepers with multivariate conditional logistic regression after adjustment for several diabetes risk factors. Hung et al.<sup>24</sup> reported no association between IFG and poor sleepers. Our findings are consistent with the report by Rafalson et al.

The global PSQI scores in volunteers with IFG were higher than those in volunteers with

1 NGT, which was consistent with the Hung et al. report.<sup>24</sup> However, there was no difference in  
2 sleep duration scores between the volunteers with IFG and the volunteers with NGT. This  
3 could be attributed to the fact that 18.3% (116/634) of the volunteers with IFG were long  
4 sleepers, while short sleepers with IFG only accounted for 22.9% (145/634).  
5

6 Short sleep duration increases appetite. After four nights of 4.5 h in bed, compared with  
7 after four nights of 8.5 h in bed, caloric intake, especially of carbohydrate-rich nutrients,  
8 increased by 14% in young normal-weight men and women.<sup>25,26</sup> Middle-aged obese  
9 volunteers submitted to four to five nights of restriction of their habitual sleep schedule by  
10 2–3 h/night ate 15% more calories than those whose habitual sleep schedule was extended by  
11 the same amount.<sup>27</sup> In volunteers with sleep debt, glucose tolerance, glucose effectiveness and  
12 insulin sensitivity are decreased, and beta-cell function is reduced.<sup>6,26,28,29</sup> Sleep loss also  
13 results in decreased anorexigenic leptin levels,<sup>30-32</sup> especially in volunteers with chronic sleep  
14 restriction.<sup>33</sup> Observational epidemiologic studies have also shown reduced leptin levels, after  
15 controlling for BMI or adiposity, in habitual short sleepers.<sup>33,34</sup> Conversely, leptin deficiency  
16 disrupts sleep architecture and impairs sleep consolidation.<sup>35</sup> Taken together, these data  
17 suggest that sleep loss is likely to have a profound impact on IFG.  
18  
19  
20  
21  
22  
23  
24  
25

26 Poor sleep quality, independent of sleep duration, impairs glucose regulation in healthy  
27 young adults.<sup>36,37</sup> After three nights of slow-wave sleep suppression, insulin sensitivity is  
28 decreased by ~25%, reaching the level reported in older adults and in populations at high risk  
29 of diabetes.<sup>38</sup> The decrease in insulin sensitivity is not compensated for by an increase in  
30 insulin release. Consequently, the disposition index is ~20% lower. Consistent with an  
31 increased diabetes risk, glucose tolerance is reduced by ~23% reaching the range typical of  
32 older adults with impaired glucose tolerance.<sup>37</sup> Sleep fragmentation also increases  
33 sympathetic activity, which in turn leads to disorders of glucose metabolism.<sup>39</sup>  
34  
35  
36  
37  
38  
39

40 Taken together, short sleep duration, increased caloric intake, poor sleep quality,  
41 decreased leptin levels, decreased insulin sensitivity and increased sympathetic activity affect  
42 each other, creating a vicious circle, which elevates the risk of IFG.  
43  
44

45 Despite the absence of the synergistic effect of good-quality sleep with long sleep  
46 duration, a strong association of IFG with long sleep duration in individuals was observed,  
47 suggesting an independent effect of long sleep duration.  
48

49 This study had several potential limitations. Firstly, because of the cross-sectional design,  
50 we could not determine a causal relationship between sleep quality, sleep duration and IFG.  
51 Secondly, we were not able to control for some important and well-known risk factors of  
52 diabetes, for example, snoring.<sup>40</sup> Thirdly, we did not measure poor diet, which is causally  
53 related to type 2 diabetes and may also influence sleep patterns.<sup>41,42</sup>  
54  
55  
56  
57

58 There are several notable strengths of this study. Participants were randomly selected  
59 from the general population of Xuzhou. In addition, the sample was large. Many confounding  
60 risk factors were adjusted for.

1 In summary, volunteers who experience short sleep durations are six times more likely to  
2 develop IFG than those whose average sleep was 6–8 h a night with good sleep quality. The  
3 joint effect of short sleep duration and poor sleep quality was positive.  
4

### 5 **Acknowledgments**

6 This research was funded by the Preventive Medicine research projects of Jiangsu Province  
7 Health Department in 2012 (Y2012025) and the Science and Technology projects of Xuzhou  
8 City in 2011 (XF11C090). Double-Hundred Talents Project of Xuzhou city in  
9 2012(BRA201224)  
10  
11  
12  
13  
14

### 15 **Conflict of Interest Statement**

16 None of the authors have a financial relationship with a commercial entity that has an interest  
17 in the subject of this manuscript. The researchers were independent from funders. The study  
18 funders had no influence on the study design, data collection, analysis, interpretation of data,  
19 writing of the report, or decision to submit the article for publication.  
20  
21  
22  
23  
24  
25

26 **Contributors** Steering Committee: PL (principal investigator), PC (principal investigator),  
27 PC and LZ. Operating Committee: LZ,PZ, GC, NZ, TL and CQ.  
28  
29  
30  
31

### 32 **References**

- 33 1. Yang W, Lu J, Weng J, et al. China National Diabetes and Metabolic Disorders Study  
34 Group. Prevalence of diabetes among men and women in China. N Engl J Med 2010;  
35 362:1090-1 101.  
36  
37  
38  
39
- 40 2. Li G, Zhang P, Wang J, et al. The long-term effect of lifestyle interventions to prevent  
41 diabetes in the China Da Qing Diabetes Prevention Study: a 20-year follow-up study.  
42 Lancet 2008; 24;371(9626):1783-9.  
43  
44  
45  
46
- 47 3. Lou P, Chen P, Yu J, et al. Analysis on the risk factors of the residents with impaired  
48 fasting glucose in Xuzhou. Chin J Dis Control Prev 2011; 15( 3) : 192-195. (In Chinese)  
49  
50  
51
- 52 4. Najafian J, Mohamadifard N, Siadat ZD, et al. Association between sleep duration and  
53 diabetes mellitus: Isfahan Healthy Heart Program. Niger J Clin Pract 2013; 16(1):59-62.  
54  
55
- 56 5. Rafalson L, Donahue RP, Stranges S, Lamonte MJ, et al. Short sleep duration is associated  
57 with the development of impaired fasting glucose: the Western New York Health Study.  
58 Ann Epidemiol 2010; 20(12):883-9.  
59  
60

- 1  
2  
3  
4  
5  
6  
7  
8  
9  
10  
11  
12  
13  
14  
15  
16  
17  
18  
19  
20  
21  
22  
23  
24  
25  
26  
27  
28  
29  
30  
31  
32  
33  
34  
35  
36  
37  
38  
39  
40  
41  
42  
43  
44  
45  
46  
47  
48  
49  
50  
51  
52  
53  
54  
55  
56  
57  
58  
59  
60
6. Spiegel K, Leproult R, Van Cauter E. Impact of sleep debt on metabolic and endocrine function. *Lancet* 1999; 354:1435-9.
7. Lou P, Chen P, Zhang L, et al. Relation study of sleep quality and sleep duration to type 2 diabetes: a population-based cross-sectional survey. *BMJ Open* 2012; 2:e000956.13.
8. Wu H, Lou P, Chen P, et al. survey the relationship between sleep quality and T2DM. *Chin J Diabetes* 2013; 21(4): 330-333. (In Chinese)
9. Chen P, Lou P, Yu J, et al. Risk factors of diabetes mellitus of residents living in Xuzhou city. *Chin J Health Manage* 2010; 4:78-80. (In Chinese)
10. Buysse DJ, Reynolds CF 3rd, Monk TH, et al. The Pittsburgh Sleep Quality Index: a new instrument for psychiatric practice and research. *Psychiatry Res* 1989; 28(2): 193–213.
11. Diagnosis and classification of diabetes mellitus. *Diabetes Care*, 2010. 33 Suppl 1: p. S62-9
12. Tsai, PS, Wang, SY, Wang, MY, et al. Psychometric evaluation of the Chinese version of the Pittsburgh Sleep Quality Index (CPSQI) in primary insomnia and control subjects. *Qual Life Res* 2005; 14(8):1943–1952.
13. Haseli-Mashhadi N, Dadd T, Pan A, et al. Sleep quality in middle-aged and elderly Chinese: distribution, associated factors and associations with cardio-metabolic risk factors. *BMC Public Health* 2009; 9:130.
14. Rothman KJ, Greenland S, Lash T L. *Modern epidemiology*, 3rd edition [M]. Philadelphia: Lippincott Williams & Wilkins, 2008.
15. Hosmer DW, Lemeshow S. Confidence interval estimation of interaction. *Epidemiology* 1992; 3(5):452-456.
16. Knol MJ, VanderWeele TJ, Groenwold RHH, et al. Estimating measures of interaction on an additive scale for preventive exposures. *Eur J Epidemiol* 2011; 26(6):433–438.
17. Gottlieb DJ, Punjabi NM, Newman AB, et al. Association of sleep time with diabetes mellitus and impaired glucose tolerance. *Arch Intern Med* 2005 ;165: 863–868.
18. Yaggi HK, Araujo AB, McKinlay JB. Sleep duration as a risk factor for the development of type 2 diabetes. *Diabetes Care* 2006; 29: 657-661
19. Hayashino Y, Fukuhara S, Suzukamo Y, et al. Relation between sleep quality and

quantity, quality of life, and risk of developing diabetes in healthy workers in Japan: the

High-risk and Population Strategy for Occupational Health Promotion

(HIPOP-OHP) Study. *BMC Public Health* 2007;7: 129.

20. Shankar A, Syamala S, Kalidindi S. Insufficient Rest or Sleep and Its Relation to Cardiovascular Disease, Diabetes and Obesity in a National, Multiethnic Sample. *PLoS ONE* 2010; 5(11): e14189.
21. Mallon L, Broman JE, Hetta J. High Incidence of Diabetes in Men With Sleep Complaints or Short Sleep Duration -A 12-year follow-up study of a middle-aged population. *Diabetes Care* 2005;28:2762–2767.
22. Nilsson PM, RÖÖst M, Engström M, et al. Incidence of Diabetes in Middle-Aged Men Is Related to Sleep Disturbances. *Diabetes Care* 2004;27:2464–2469.
23. Vgontzas AN, Liao D, Pejovic S, et al. Insomnia With Objective Short Sleep Duration Is Associated With Type 2 Diabetes : A population-based study. *Diabetes Care* 2009;32:1980–1985.
24. Hung HC, Yang YC, Ou HY, et al. The relationship between impaired fasting glucose and self-reported sleep quality in a Chinese population. *Clin Endocrinol (Oxf)* 2013;78(4):518-24.
25. Tasali E, Leproult R, Spiegel K. Reduced sleep duration or quality: relationships with insulin resistance and type 2 diabetes. *Prog Cardiovasc Dis* 2009; 51:381–391.
26. Nedeltcheva AV, Kessler L, Imperial J, et al. Exposure to recurrent sleep restriction in the setting of high caloric intake and physical inactivity results in increased insulin resistance and reduced glucose tolerance. *J Clin Endocrinol Metabol* 2009; 94:3242–3250.
27. Morselli L, Balbo M, Van Cauter E, et al. Impact of sleep restriction on the regulation of appetite in middle-aged obese subjects. 4th International World Sleep Congress; Quebec City, Québec. 2011.
28. Buxton OM, Pavlova M, Reid EW, et al. Sleep restriction for 1 week reduces insulin sensitivity in healthy men. *Diabetes* 2010; 59:2126–2133.
29. Simpson NS, Banks S, Dinges DF. Sleep restriction is associated with increased morning

plasma leptin concentrations, especially in women. *Biol Res Nurs* 2010; 12:47–53.

30. Guilleminault C, Powell NB, Martinez S, et al. Preliminary observations on the effects of sleep time in a sleep restriction paradigm. *Sleep Med.* 2003; 4:177–184.
31. Spiegel K, Leproult R, L'hermite-Balériaux M, et al. Leptin levels are dependent on sleep duration: relationships with sympathovagal balance, carbohydrate regulation, cortisol, and thyrotropin. *J Clin Endocrinol Metabol* 2004; 89(11):5762–5771.
32. Spiegel K, Tasali E, Penev P, et al. Sleep curtailment in healthy young men is associated with decreased leptin levels, elevated ghrelin levels, and increased hunger and appetite. *Ann Intern Med* 2004; 141:846–850.
33. Taheri S, Lin L, Austin D, et al. Short sleep duration is associated with reduced leptin, elevated ghrelin, and increased body mass index. *PLoS Med* 2004; 1:e62.
34. Chaput JP, Despres JP, Bouchard C, et al. Short sleep duration is associated with reduced leptin levels and increased adiposity: results from the Quebec family study. *Obesity* (Silver Spring, Md) 2007; 15:253–261.
35. Laposky AD, Shelton J, Bass J, et al. Altered sleep regulation in leptin-deficient mice. *Am J Physiol Regul Integr Comp Physiol* 2006; 290:R894–R903.
36. Stamatakis KA, Punjabi NM. Effects of sleep fragmentation on glucose metabolism in normal subjects. *Chest* 2010; 137:95–101.
37. Tasali E, Leproult R, Ehrmann DA, et al. Slow-wave sleep and the risk of type 2 diabetes in humans. *Proc Natl Acad Sci USA* 2008; 105:1044–1049.
38. Bergman RN. Lilly lecture 1989. Toward physiological understanding of glucose tolerance. Minimal-model approach. *Diabetes* 1989; 38:1512–1527.
39. Peltier AC, Consens FB, Sheikh K, et al. Autonomic dysfunction in obstructive sleep apnea is associated with impaired glucose regulation. *Sleep Medicine* 2007.8(2): 149–155.
40. Al-Delaimy WK, Manson JE, Willett WC, et al. Snoring as a risk factor for type II diabetes mellitus: a prospective study. *Am J Epidemiol* 2002 ;155:387–393,
41. Tonstad SMD, Butler T, Yan R, et al. Type of Vegetarian Diet, Body Weight, and

Prevalence of Type 2 Diabetes. *Diabetes Care* 2009;32(8):791-796.

42. Grandner MA, Kripke DF, Naidoo N, et al. Langer Relationships among dietary nutrients and subjective sleep, objective sleep, and napping in women. *Sleep Med* 2010; 11: 180.

For peer review only

1  
2  
3  
4  
5  
6  
7  
8  
9  
10  
11  
12  
13  
14  
15  
16  
17  
18  
19  
20  
21  
22  
23  
24  
25  
26  
27  
28  
29  
30  
31  
32  
33  
34  
35  
36  
37  
38  
39  
40  
41  
42  
43  
44  
45  
46  
47  
48  
49  
50  
51  
52  
53  
54  
55  
56  
57  
58  
59  
60



**Table 1** Baseline characteristics of the study population (N = 15,145)

| Reported variable                 | All       | IFG            |             |        |
|-----------------------------------|-----------|----------------|-------------|--------|
|                                   |           | No             | Yes         | P      |
|                                   | 15145     | 14,511(95.81%) | 634(4.19%)  |        |
| Age(years)                        | 47.6±15.1 | 47.4±14.7      | 52.2±16.2   | 8.012  |
| ≥45 years                         | 8362      | 7928(94.81%)   | 434(5.19%)  | 0.000  |
| Sex(% man)                        | 49.9      | 50.0           | 49.8        | 0.938  |
| Rural (%)                         | 72.4      | 72.4           | 72.9        | 0.795  |
| Manual                            | 10833     | 10359(95.62%)  | 474(4.38%)  | 0.023  |
| Non-manual                        | 1045      | 1016(97.22%)   | 29(2.78%)   |        |
| Unemployed                        | 677       | 658(97.19%)    | 19(2.81%)   |        |
| retired                           | 2590      | 2478(95.68%)   | 112(4.32%)  |        |
| Married (living with partners)(%) | 88.5      | 88.6           | 86.3        | 0.073  |
| Below high school                 | 11899     | 11400(95.81%)  | 499(4.19%)  | 0.986  |
| high school                       | 1760      | 1686(95.80%)   | 74(4.20%)   |        |
| Above high school                 | 1486      | 1425(95.90%)   | 61(4.10%)   |        |
| smoker                            | 3541      | 3367(95.09%)   | 174(4.91%)  | 0.014  |
| alcohol use                       | 2872      | 2752(95.82%)   | 120(4.18%)  | 0.981  |
| Regular exercise                  | 2559      | 2452(95.82%)   | 107(4.18%)  | 0.989  |
| Family history of diabetes        | 483       | 362(74.95%)    | 121(25.05%) | 0.000  |
| BMI, mean(SD)                     | 23.9±4.7  | 23.8±5.8       | 25.2±4.1    | <0.001 |
| Central obesity                   | 4613      | 4219(91.46%)   | 394(8.54%)  | 0.000  |
| Hypertension                      | 3060      | 2901(94.80%)   | 159(5.20%)  | 0.002  |
| Sleep duration(hour)              |           |                |             |        |
| ≤6                                | 1984      | 1839(92.70%)   | 145(7.30%)  | 0.000  |
| 6-8                               | 11292     | 10919(96.70%)  | 373(3.30%)  |        |
| ≥8                                | 1869      | 1753(93.80%)   | 116(6.20%)  |        |
| Sleep quality                     |           |                |             |        |
| Good                              | 11209     | 10840(96.71%)  | 369(3.29%)  | 0.000  |
| Poor                              | 3936      | 3671(93.27%)   | 265(6.73%)  |        |

**Table 2** Comparison of Pittsburgh Sleep Quality Index scores between individuals with impaired fasting glucose and controls ( $\bar{x}$   $\pm$  sd)

| <i>Items</i>             | <i>IFG</i>  |             | <i>F value</i> | <i>P</i> |
|--------------------------|-------------|-------------|----------------|----------|
|                          | No          | Yes         |                |          |
| Subjective sleep quality | 0.415±0.013 | 0.463±0.03  | 31.823         | 0.000    |
| Sleep latency            | 0.742±0.004 | 0.800±0.016 | 27.446         | 0.000    |
| Sleep duration           | 0.152±0.002 | 0.159±0.001 | 0.503          | 0.478    |
| Sleep efficiency         | 0.444±0.003 | 0.321±0.001 | 29.452         | 0.000    |
| Sleep disturbance        | 0.591±0.003 | 0.658±0.012 | 28.259         | 0.000    |
| Use of hypnotic          | 0.051±0.002 | 0.065±0.007 | 16.651         | 0.000    |
| Daytime dysfunction      | 0.147±0.011 | 0.170±0.002 | 9.725          | 0.000    |
| Global PSQI scores       | 2.302±0.009 | 2.495±0.041 | 20.957         | 0.000    |

Using analysis of covariance, Covariates for age =47.26 years old

**Table 3** Odds ratios for the association between sleep quality, sleep duration and impaired fasting glucose among participants

| Variables      |      | IFG | No IFG | OR (95%CI)       | P     |
|----------------|------|-----|--------|------------------|-------|
| Sleep quality  | Good | 369 | 10840  | 1                | 0.000 |
|                | Poor | 265 | 3671   | 1.21(1.09-1.34)  |       |
| Sleep duration | 6-8h | 373 | 10919  | 1                | 0.000 |
|                | <6h  | 145 | 1839   | 2.16 (1.33-3.47) |       |
|                | >8h  | 116 | 1753   | 1.89 (1.50-2.34) |       |

Adjusted for age, sex, education, employment, BMI, family history of diabetes, smoking status, alcohol consumption and physical activity.

**Table 4** Odds ratios for the association between sleep quality and impaired fasting glucose by sleep duration among participants

| <i>Sleep duration</i> | <i>Sleep quality</i> | <i>IFG</i> | <i>No IFG</i> | <i>OR (95%CI)</i> | <i>P</i> |
|-----------------------|----------------------|------------|---------------|-------------------|----------|
| 6-8h                  | Good                 | 246        | 8743          | 1                 |          |
|                       | Poor                 | 127        | 2176          | 1.98 (1.76-2.52)  | <0.001   |
| <6h                   | Good                 | 53         | 1329          | 1.38 (1.12-1.61)  | <0.001   |
|                       | Poor                 | 92         | 510           | 6.37 (4.66-8.67)  | <0.001   |
| >8h                   | Good                 | 70         | 768           | 3.17 (2.29-4.41)  | <0.001   |
|                       | Poor                 | 46         | 985           | 1.59 (1.08-2.29)  | <0.001   |

Adjusted for age, sex, education, employment, BMI, family history of diabetes, smoking status, alcohol consumption and physical activity.

**Table 5** Measures for estimation of the biological interaction between sleep quality and sleep duration for the prevalence of impaired fasting glucose in participants

| Measures of biological interaction            | Estimate (95% CI)  |
|-----------------------------------------------|--------------------|
| Poor sleep quality versus sleep duration < 6h |                    |
| RERI                                          | 1.69(0.31–3.76)    |
| AP                                            | 0.42(0.15–0.61)    |
| S                                             | 2.85(2.14–3.92)    |
| Good sleep quality versus sleep duration > 8h |                    |
| RERI                                          | 0.78(0.12–1.43)    |
| AP                                            | 0.61(0.26–0.87)    |
| S                                             | -0.65(-0.94–-0.27) |

Reference group is good sleep quality with 6-8 sleep duration.

Adjusted for age, sex, education, occupation, BMI, family history of diabetes, smoking status, alcohol consumption, and hypertension.

## STROBE Statement—checklist of items that should be included in reports of observational studies

|                          | Item No | Recommendation                                                                                                                                                                                                                                                                                                                                                                                                                                                         |          |
|--------------------------|---------|------------------------------------------------------------------------------------------------------------------------------------------------------------------------------------------------------------------------------------------------------------------------------------------------------------------------------------------------------------------------------------------------------------------------------------------------------------------------|----------|
| Title and abstract       | 1       | (a) Indicate the study's design with a commonly used term in the title or the abstract                                                                                                                                                                                                                                                                                                                                                                                 | Page 1   |
|                          |         | (b) Provide in the abstract an informative and balanced summary of what was done and what was found                                                                                                                                                                                                                                                                                                                                                                    | Page 2   |
| <b>Introduction</b>      |         |                                                                                                                                                                                                                                                                                                                                                                                                                                                                        |          |
| Background/rationale     | 2       | Explain the scientific background and rationale for the investigation being reported                                                                                                                                                                                                                                                                                                                                                                                   | Page 3   |
| Objectives               | 3       | State specific objectives, including any prespecified hypotheses                                                                                                                                                                                                                                                                                                                                                                                                       | Page 3   |
| <b>Methods</b>           |         |                                                                                                                                                                                                                                                                                                                                                                                                                                                                        |          |
| Study design             | 4       | Present key elements of study design early in the paper                                                                                                                                                                                                                                                                                                                                                                                                                | Page 3   |
| Setting                  | 5       | Describe the setting, locations, and relevant dates, including periods of recruitment, exposure, follow-up, and data collection                                                                                                                                                                                                                                                                                                                                        | Page 3-4 |
| Participants             | 6       | (a) <i>Cohort study</i> —Give the eligibility criteria, and the sources and methods of selection of participants. Describe methods of follow-up<br><i>Case-control study</i> —Give the eligibility criteria, and the sources and methods of case ascertainment and control selection. Give the rationale for the choice of cases and controls<br><i>Cross-sectional study</i> —Give the eligibility criteria, and the sources and methods of selection of participants | Page 4   |
|                          |         | (b) <i>Cohort study</i> —For matched studies, give matching criteria and number of exposed and unexposed<br><i>Case-control study</i> —For matched studies, give matching criteria and the number of controls per case                                                                                                                                                                                                                                                 |          |
| Variables                | 7       | Clearly define all outcomes, exposures, predictors, potential confounders, and effect modifiers. Give diagnostic criteria, if applicable                                                                                                                                                                                                                                                                                                                               | Page 4-5 |
| Data sources/measurement | 8*      | For each variable of interest, give sources of data and details of methods of assessment (measurement). Describe comparability of assessment methods if there is more than one group                                                                                                                                                                                                                                                                                   | Page 4-5 |
| Bias                     | 9       | Describe any efforts to address potential sources of bias                                                                                                                                                                                                                                                                                                                                                                                                              |          |
| Study size               | 10      | Explain how the study size was arrived at                                                                                                                                                                                                                                                                                                                                                                                                                              | Page 4   |
| Quantitative variables   | 11      | Explain how quantitative variables were handled in the analyses. If applicable, describe which groupings were chosen and why                                                                                                                                                                                                                                                                                                                                           | Page 4-5 |
| Statistical methods      | 12      | (a) Describe all statistical methods, including those used to control for confounding                                                                                                                                                                                                                                                                                                                                                                                  | Page 5   |
|                          |         | (b) Describe any methods used to examine subgroups and interactions                                                                                                                                                                                                                                                                                                                                                                                                    | Page 5   |
|                          |         | (c) Explain how missing data were addressed                                                                                                                                                                                                                                                                                                                                                                                                                            |          |
|                          |         | (d) <i>Cohort study</i> —If applicable, explain how loss to follow-up was addressed<br><i>Case-control study</i> —If applicable, explain how matching of cases and controls was addressed<br><i>Cross-sectional study</i> —If applicable, describe analytical methods taking account of sampling strategy                                                                                                                                                              | Page 5   |
|                          |         | (e) Describe any sensitivity analyses                                                                                                                                                                                                                                                                                                                                                                                                                                  | Page 5   |

| <b>Results</b>           |     |                                                                                                                                                                                                              |          |
|--------------------------|-----|--------------------------------------------------------------------------------------------------------------------------------------------------------------------------------------------------------------|----------|
| Participants             | 13* | (a) Report numbers of individuals at each stage of study—eg numbers potentially eligible, examined for eligibility, confirmed eligible, included in the study, completing follow-up, and analysed            | Page 6   |
|                          |     | (b) Give reasons for non-participation at each stage                                                                                                                                                         | Page 6   |
|                          |     | (c) Consider use of a flow diagram                                                                                                                                                                           | Figur1   |
| Descriptive data         | 14* | (a) Give characteristics of study participants (eg demographic, clinical, social) and information on exposures and potential confounders                                                                     | Table1   |
|                          |     | (b) Indicate number of participants with missing data for each variable of interest                                                                                                                          | Table2   |
|                          |     | (c) <i>Cohort study</i> —Summarise follow-up time (eg, average and total amount)                                                                                                                             | Page6    |
| Outcome data             | 15* | <i>Cohort study</i> —Report numbers of outcome events or summary measures over time                                                                                                                          | Page6    |
|                          |     | <i>Case-control study</i> —Report numbers in each exposure category, or summary measures of exposure                                                                                                         |          |
|                          |     | <i>Cross-sectional study</i> —Report numbers of outcome events or summary measures                                                                                                                           |          |
| Main results             | 16  | (a) Give unadjusted estimates and, if applicable, confounder-adjusted estimates and their precision (eg, 95% confidence interval). Make clear which confounders were adjusted for and why they were included | Table3-5 |
|                          |     | (b) Report category boundaries when continuous variables were categorized                                                                                                                                    | Page7    |
|                          |     | (c) If relevant, consider translating estimates of relative risk into absolute risk for a meaningful time period                                                                                             |          |
| Other analyses           | 17  | Report other analyses done—eg analyses of subgroups and interactions, and sensitivity analyses                                                                                                               |          |
| <b>Discussion</b>        |     |                                                                                                                                                                                                              |          |
| Key results              | 18  | Summarise key results with reference to study objectives                                                                                                                                                     | Page8    |
| Limitations              | 19  | Discuss limitations of the study, taking into account sources of potential bias or imprecision. Discuss both direction and magnitude of any potential bias                                                   | Page10   |
| Interpretation           | 20  | Give a cautious overall interpretation of results considering objectives, limitations, multiplicity of analyses, results from similar studies, and other relevant evidence                                   | Page10   |
| Generalisability         | 21  | Discuss the generalisability (external validity) of the study results                                                                                                                                        | Page10   |
| <b>Other information</b> |     |                                                                                                                                                                                                              |          |
| Funding                  | 22  | Give the source of funding and the role of the funders for the present study and, if applicable, for the original study on which the present article is based                                                | Page11   |

\*Give information separately for cases and controls in case-control studies and, if applicable, for exposed and unexposed groups in cohort and cross-sectional studies.

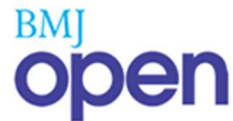

**Interaction of sleep quality and sleep duration on impaired fasting glucose: A population-based cross-sectional survey in China**

|                                 |                                                                                                                                                                                                                                                                                                                                                                                                                                                                                                                                                                                                                                                                                                                                                                                                                                                                                                                                                                                                                                                                                                                                                                                                                                                                                                                                                                                                                                                                                                                                                                                                                                                                                                               |
|---------------------------------|---------------------------------------------------------------------------------------------------------------------------------------------------------------------------------------------------------------------------------------------------------------------------------------------------------------------------------------------------------------------------------------------------------------------------------------------------------------------------------------------------------------------------------------------------------------------------------------------------------------------------------------------------------------------------------------------------------------------------------------------------------------------------------------------------------------------------------------------------------------------------------------------------------------------------------------------------------------------------------------------------------------------------------------------------------------------------------------------------------------------------------------------------------------------------------------------------------------------------------------------------------------------------------------------------------------------------------------------------------------------------------------------------------------------------------------------------------------------------------------------------------------------------------------------------------------------------------------------------------------------------------------------------------------------------------------------------------------|
| Journal:                        | <i>BMJ Open</i>                                                                                                                                                                                                                                                                                                                                                                                                                                                                                                                                                                                                                                                                                                                                                                                                                                                                                                                                                                                                                                                                                                                                                                                                                                                                                                                                                                                                                                                                                                                                                                                                                                                                                               |
| Manuscript ID:                  | bmjopen-2013-004436.R2                                                                                                                                                                                                                                                                                                                                                                                                                                                                                                                                                                                                                                                                                                                                                                                                                                                                                                                                                                                                                                                                                                                                                                                                                                                                                                                                                                                                                                                                                                                                                                                                                                                                                        |
| Article Type:                   | Research                                                                                                                                                                                                                                                                                                                                                                                                                                                                                                                                                                                                                                                                                                                                                                                                                                                                                                                                                                                                                                                                                                                                                                                                                                                                                                                                                                                                                                                                                                                                                                                                                                                                                                      |
| Date Submitted by the Author:   | 12-Feb-2014                                                                                                                                                                                                                                                                                                                                                                                                                                                                                                                                                                                                                                                                                                                                                                                                                                                                                                                                                                                                                                                                                                                                                                                                                                                                                                                                                                                                                                                                                                                                                                                                                                                                                                   |
| Complete List of Authors:       | Lou, Peian; Department of Control and Prevention of Chronic Non-communicable Diseases, Xuzhou Center for Disease Control and Prevention, Xuzhou, School of Public Health, Xuzhou Medical University, China,<br>Chen, Peipei; Department of Control and Prevention of Chronic Non-communicable Diseases, Xuzhou Center for Disease Control and Prevention, Xuzhou, School of Public Health, Xuzhou Medical University, China,<br>Zhang, Lei; Department of Control and Prevention of Chronic Non-communicable Diseases, Xuzhou Center for Disease Control and Prevention, Xuzhou, School of Public Health, Xuzhou Medical University, China,<br>Zhang, Pan; Department of Control and Prevention of Chronic Non-communicable Diseases, Xuzhou Center for Disease Control and Prevention, Xuzhou, School of Public Health, Xuzhou Medical University, China,<br>Chang, Guiqiu; Department of Control and Prevention of Chronic Non-communicable Diseases, Xuzhou Center for Disease Control and Prevention, Xuzhou, School of Public Health, Xuzhou Medical University, China,<br>Zhang, Ning; Department of Control and Prevention of Chronic Non-communicable Diseases, Xuzhou Center for Disease Control and Prevention, Xuzhou, School of Public Health, Xuzhou Medical University, China,<br>Li, Ting; Department of Control and Prevention of Chronic Non-communicable Diseases, Xuzhou Center for Disease Control and Prevention, Xuzhou, School of Public Health, Xuzhou Medical University,,<br>Qiao, Cheng; Department of Control and Prevention of Chronic Non-communicable Diseases, Xuzhou Center for Disease Control and Prevention, Xuzhou, School of Public Health, Xuzhou Medical University,, |
| <b>Primary Subject Heading</b>: | Diabetes and endocrinology                                                                                                                                                                                                                                                                                                                                                                                                                                                                                                                                                                                                                                                                                                                                                                                                                                                                                                                                                                                                                                                                                                                                                                                                                                                                                                                                                                                                                                                                                                                                                                                                                                                                                    |
| Secondary Subject Heading:      | Epidemiology                                                                                                                                                                                                                                                                                                                                                                                                                                                                                                                                                                                                                                                                                                                                                                                                                                                                                                                                                                                                                                                                                                                                                                                                                                                                                                                                                                                                                                                                                                                                                                                                                                                                                                  |
| Keywords:                       | DIABETES & ENDOCRINOLOGY, General diabetes < DIABETES & ENDOCRINOLOGY, EPIDEMIOLOGY                                                                                                                                                                                                                                                                                                                                                                                                                                                                                                                                                                                                                                                                                                                                                                                                                                                                                                                                                                                                                                                                                                                                                                                                                                                                                                                                                                                                                                                                                                                                                                                                                           |
|                                 |                                                                                                                                                                                                                                                                                                                                                                                                                                                                                                                                                                                                                                                                                                                                                                                                                                                                                                                                                                                                                                                                                                                                                                                                                                                                                                                                                                                                                                                                                                                                                                                                                                                                                                               |



1  
2  
3  
4  
5  
6  
7  
8  
9  
10  
11  
12  
13  
14  
15  
16  
17  
18  
19  
20  
21  
22  
23  
24  
25  
26  
27  
28  
29  
30  
31  
32  
33  
34  
35  
36  
37  
38  
39  
40  
41  
42  
43  
44  
45  
46  
47  
48  
49  
50  
51  
52  
53  
54  
55  
56  
57  
58  
59  
60

SCHOLARONE™  
Manuscripts

For peer review only

**Interaction of sleep quality and sleep duration on impaired fasting glucose:****A population-based cross-sectional survey in China**

**Peian Lou<sup>\*</sup>, Peipei Chen, Lei Zhang, Pan Zhang, Guiqiu Chang, Ning Zhang, Ting Li, Cheng Qiao**

Department of Control and Prevention of Chronic Non-communicable Diseases, Xuzhou  
Center for Disease Control and Prevention, Xuzhou, School of Public Health, Xuzhou  
Medical University, China

**\*Corresponding author:** Peian Lou, phone: 0516-85956785, fax: 0516-89596797

42 West Erhuan Road, Xuzhou City, Jiangsu Province, China

E-mail: lpa82835415@126.com

**Key words:** Interaction; Sleep quality; Sleep duration; Impaired fasting glucose

**Word count:** 2543

**Abstract**

**Objectives:** To explore the interactions of sleep quality and sleep duration and their effects on impaired fasting glucose in Chinese adults.

**Design:** Cross-sectional survey.

**Setting:** Community-based investigation in Xuzhou, China.

**Participants:** 15,145 Chinese men and women aged 18–75 years old who fulfilled the inclusion criteria.

**Primary and secondary outcome measures:** The Pittsburgh Sleep Quality Index was used to produce sleep quality categories of good, common and poor. Fasting blood glucose levels were assessed for impaired fasting glucose. Sleep duration was measured by average hours of sleep per night, with categories of <6 h, 6–8 h, and >8 h. The products of sleep and family history of diabetes, obesity and age were added to the logistic regression model to evaluate the additive interaction and relative excess risk of interaction (RERI) on impaired fasting glucose. The attributable proportion (AP) of the interaction and the synergy index (S) were applied to evaluate the additive interaction of two factors. Bootstrap measures were used to calculate 95% confidence intervals (CI) of RERI, AP and S.

**Results:** The prevalence of IFG was greatest in those with poor sleep quality and short sleep duration (OR: 6.37; 95% CI: 4.66–8.67;  $p < 0.001$ ) compared with those who had good sleep quality and 6–8 h sleep duration, after adjusting for confounders. After adjusting for potential confounders, RERI, AP and S values (and their 95% CI) were 1.69 (0.31–3.76), 0.42 (0.15–0.61) and 2.85 (2.14–3.92) for the interaction between poor sleep quality and short sleep duration, and 0.78 (0.12–1.43), 0.61 (0.26–0.87) and –0.65 (–0.94 to –0.27) for the interaction between good sleep quality and long sleep duration.

**Conclusions:** The results suggest that there are additive interactions between poor sleep quality and short sleep duration.

**ARTICLE SUMMARY**

## Article focus

- To describe the combined effects of sleep duration and sleep quality for impaired fasting glucose in people in Xuzhou, China.

## Key messages

- There exist additive interactions between sleep quality and sleep duration on impaired fasting glucose.

- A strength of the study is the large sample.

- Limitations of the study the cross-sectional design.

## Introduction

Prediabetes has a prevalence of 15.5% and affects an estimated 148.2 million Chinese adults.<sup>1</sup> Prediabetes, including impaired fasting glucose (IFG) and impaired glucose tolerance (IGT), is the most important risk factor for type 2 diabetes. The average annual incidence of diabetes in a cohort of patients with IFG is 11% over a six-year period without intervention.<sup>2</sup> Older age, a family history of diabetes, being overweight, obesity, central obesity, increased heart rate, elevated systolic blood pressure, elevated serum triglyceride levels, high income, history of hypertension, history of coronary heart disease, history of drinking, eating pickled foods, and low educational level are significantly associated with an increased risk of prediabetes.<sup>1,3</sup> Increasingly, studies have shown that prediabetes is associated with poor sleep quantity and quality.<sup>3,4</sup> A cross-sectional study has suggested that, compared with those sleeping 7–8 h per night, individuals aged <60 years who slept 5 h or less had an increased odds ratio (OR) for IGT (OR: 1.37, 95% confidence interval [CI]: 1.13–1.67).<sup>4</sup> The Western New York Health Study including 1455 participants showed that sleep duration of less than 6 h was associated with increased prevalence of IFG, compared with those sleeping 6–8 h per night, after adjustment for confounders, over six years of follow up.<sup>5</sup> Spiegel et al. have demonstrated that experimental restriction of sleep to <4 h per night for six nights resulted in an impaired glucose tolerance (IGT) in young healthy adults.<sup>6</sup>

Our previous results suggest that poor quality of sleep and sleep duration <6 h per night are independent risk factors for type 2 diabetes, even after adjusting for a large number of possible confounders.<sup>7,8</sup> Our previous study also confirmed that relatively healthy individuals with poor sleep quality and sleeping times of 6 h or less had a higher risk of IFG, even after adjusting for a large number of confounding factors.<sup>3</sup>

Although these risk factors play a role in the development of type 2 diabetes, the disease is the result of the interaction of genetic and environmental factors. There is little understanding of multivariate explanations of IFG in relatively healthy individuals. To our knowledge, there are no studies on the interaction of sleep quality and sleep duration on IFG in relatively healthy individuals. The primary aim of this cross-sectional study was to examine the combined effects of sleep quality and sleep duration on IFG in relatively healthy individuals in a Chinese primary-care setting. A secondary aim was to assess the associations of sleep quality and IFG, and of sleep duration and IFG.

## Methods

The study was a continuation of our previous work.<sup>9</sup> The investigation was conducted from March to November 2012 with a sample size of 15,145 volunteers (7557 men and 7588 women) aged 18 to 75 years. Briefly, the sampling was selected with probability proportional

1 to size from all of the eleven regions in Xuzhou city. In the first stage, 5  
2 subdistricts/townships in urban/rural areas were selected from each region. In the second  
3 stage, 5 communities/ villages were selected from each subdistricts/townships. In the final  
4 stage, one person who was at least 18 years old and lived in the current residence for at least 5  
5 years was selected from each household using a Kish selection table. A total of 16500 people  
6 were selected assuming an estimation prevalence of diabetes of 5.5% with 90% power and  
7  $\alpha=0.05$  and allowing for a drop-out of 10%. All volunteers received a health check and  
8 completed a structured questionnaire covering demographic information, medical history,  
9 medication history, sleep assessment, and smoking, alcohol drinking and exercise habits. All  
10 volunteers underwent 12-h overnight fasting and blood sampling for basic fasting plasma  
11 glucose (FPG). After blood sampling, each volunteer completed the Pittsburgh Sleep Quality  
12 Index (PSQI).<sup>10</sup> We excluded volunteers who were pregnant, had received antihypertensive  
13 medication, or were suffering from any cardiovascular disease, stroke, neuropathy, psychosis,  
14 depression, chronic obstructive pulmonary disease, obstructive sleep apnea, diabetes, ache, or  
15 any other disease. Those who had missing information on sleep duration or sleep quality were  
16 also excluded. Trained physicians and public health workers conducted face-to-face  
17 interviews using a standardized questionnaire to collect socio-demographic, lifestyle and  
18 health-related information.  
19  
20  
21  
22  
23  
24  
25  
26  
27  
28  
29  
30  
31  
32  
33  
34  
35  
36  
37  
38

39 The study protocol was approved by the Xuzhou Center for Disease Control and  
40 Prevention. All participants provided written informed consent.  
41  
42  
43

#### 44 **Key measurements**

45 The FPG was determined by morning blood samples obtained by venipuncture after an  
46 overnight fast of at least 12h, and extracted plasma was stored at  $-70^{\circ}\text{C}$  for later glucose  
47 determination by the hexokinase method. According to the current WHO definition of IFG<sup>11</sup>.  
48  
49

50 The PSQI is a validated self-rated questionnaire that assesses sleep quality over a  
51 one-month time interval.<sup>10</sup> Nineteen items generate seven component scores that reflect sleep  
52 problems in the areas of subjective sleep quality, sleep latency, sleep duration, habitual sleep  
53 efficiency, sleep disturbances, use of sleep medications and daytime dysfunction. The sum of  
54 the scores for these seven components produces a global sleep quality score within a range of  
55 0–21 points. A global PSQI score  $>5$  has a diagnostic sensitivity of 89.6% and specificity of  
56 86.5% in differentiating poor from good sleepers. The Chinese version of the PSQI used with  
57  
58  
59  
60

1 permission from the original PSQI authors, has an overall reliability coefficient of 0.82–0.83  
2 and acceptable test–retest reliability, with a coefficient of 0.77–0.85.<sup>12</sup> Accordingly, in this  
3 study design, a PSQI score  $\leq 5$  was also conventionally defined as ‘good sleep quality’, and a  
4 PSQI score  $> 5$  was defined as ‘poor sleep quality’  
5

6 Self-reported sleep measures of chronic sleep. Two variables were used to evaluate degree  
7 of “chronic sleep restriction” by estimating average nightly sleep duration: (i) “usual sleep”  
8 (from questionnaires) and (ii) “average nightly sleep” (from sleep diaries). Sleep quantity was  
9 categorized as  $<6$ ,  $6-8$ , and  $>8$  h per night accordance with our previous study.<sup>3,7,8</sup>  
10  
11  
12  
13

### 14 **Covariates**

15 Age, gender, current employment status, level of education, cigarette smoking, alcohol  
16 intake, physical activity, family history of diseases including diabetes, hypertension, heart  
17 disease, and cancer were assessed using a standardized questionnaire. Employment status was  
18 categorized as manual, non-manual, unemployed, and retired. Education was categorized into  
19 below high school, high school, or above high school education. Lifestyle variables included  
20 cigarette smoking, alcohol drinking and physical activity level. Cigarette smoking was  
21 defined as having smoked at least 100 cigarettes in a lifetime. Information was obtained on  
22 the amount and type of alcohol that was consumed during the previous year, and alcohol  
23 drinking was defined as the consumption of at least 30 g of alcohol per week for one year or  
24 more. Regular leisure-time physical activity was defined as participating in moderate or  
25 vigorous activity for no less than 30 minutes per day at least three days a week. Each  
26 volunteer’s body height (to the nearest 0.1 cm) and weight (to the nearest 0.1 kg) in light  
27 indoor clothing were measured. Body mass index (BMI; in  $\text{kg}/\text{m}^2$ ) was calculated. BMI was  
28 categorized as underweight ( $<18.5 \text{ kg}/\text{m}^2$ ), normal weight ( $18.5-24.0 \text{ kg}/\text{m}^2$ ) and  
29 overweight/obese ( $>24.0 \text{ kg}/\text{m}^2$ ).<sup>13</sup>  
30  
31  
32  
33  
34  
35  
36  
37  
38  
39  
40  
41  
42

### 43 **Statistical analysis**

44 Statistical analysis was performed on a computer, using the statistical analysis program  
45 SPSS 13.0 (SPSS, Chicago, IL, USA). Mean differences of continuous variables between  
46 groups were tested using analysis of variance (ANOVA). The chi-squared test was used to  
47 calculate the difference in proportions between groups. Logistic regression analysis was  
48 performed to estimate the probability of having IFG and 95% CI for each risk factor category  
49 stratified by sleep quality and sleep duration, adjusting for age, residential areas, occupation,  
50 education and income levels, leisure-time physical activity, smoking status, drinking status  
51 and hypertension status. The observed prevalences of IFG were plotted and stratified by sleep  
52 quality and sleep duration.  
53  
54  
55  
56  
57  
58  
59  
60

Biological interactions should be based on the sum of the scale rather than multiplying  
the scale.<sup>14,15</sup> Therefore, we used three measures to estimate biological interactions of poor

1 sleep quality and short sleep duration: relative excess risk owing to interaction (RERI), the  
2 attributable proportion (AP) owing to interaction, and the synergy index (S). The RERI is the  
3 excess risk attributed to interaction relative to the risk without exposure to poor sleep quality  
4 and short sleep duration. AP refers to the attributable proportion of disease caused by  
5 interaction in subjects with exposure to both variables. S is the excess risk from exposure to  
6 both variables when there is a biological interaction relative to the risk from exposure to both  
7 variables without interaction. In the absence of additive interactions, RERI and AP are equal  
8 to 0.<sup>16</sup> In the current study,  $RERI > 0$ ,  $AP > 0$  and  $S > 0$  indicate statistical significance. A  $p$   
9 value  $< 0.05$  (two-tailed) was considered statistically significant.  
10  
11  
12  
13  
14  
15  
16

## 17 Results

### 18 General characteristics of participants

19 The response rate was 91.3%. Of the 16584 initial participants, 125 did not respond to the  
20 sleep items or blood glucose, 1314 did not meet our study criteria, 15,145 adults (7557 men  
21 and 7588 women) with complete data were included in our analysis. The average sleep  
22 duration per night was  $7.16 \pm 1.06$ h. The average age was  $47.6 \pm 15.1$  years. Among them,  
23 634 had IFG; the remainder had normal glucose tolerance (NGT). The characteristics of the  
24 study population are presented in Table 1. The characteristics between individuals with poor  
25 sleep quality and sleep duration  $< 6$ h and controls are presented in Table 2. The proportion  
26 of volunteers with poor sleep quality was 26.0%, the proportion with sleep duration  $< 6$  h was  
27 12.5%, the proportion with sleep duration  $> 8$  h was 12.3%. The 6.7% prevalence of IFG in  
28 volunteers with poor sleep quality was higher than that in volunteers with good sleep quality  
29 ( $\chi^2 = 85.98$ ,  $p < 0.001$ ). Individuals with sleep duration  $< 6$  h had a higher IFG prevalence  
30 compared with individuals with sleep duration 6–8 h, (7.3 vs 3.3%;  $\chi^2 = 72.20$ ,  $p < 0.001$ ).  
31 Individuals with sleep duration  $> 8$  h also had also had higher prevalence of IFG (6.2 vs 3.3%;  
32  $\chi^2 = 37.78$ ,  $p < 0.001$ ).  
33  
34  
35  
36  
37  
38  
39  
40  
41  
42  
43  
44  
45

### 46 Comparison of PSQI scores between the volunteers with IFG and NGT

47 Volunteers with IFG had significantly higher global PSQI scores than those with NGT. For  
48 all PSQI items except sleep duration, there were significant differences ( $p < 0.05$ ) in PSQI  
49 scores between the two groups (Table 3) even after adjusted age.  
50

### 51 The association of sleep time and quality with IFG

52 Individuals with short sleep duration or long sleep duration had significantly increased risk of  
53 IFG compared with those with good sleep quality and sleep duration 6–8 h (OR: 2.16; 95%  
54 CI: 1.33–3.47; OR: 1.89; 95% CI: 1.50–2.34; respectively. all  $P < 0.001$ ), after adjusting for  
55 confounders (See table 3). Individuals with poor sleep quality had significantly increased risk  
56 of IFG compared with those with good sleep quality (OR: 1.98; 95% CI: 1.69–2.21;  $P < 0.001$ ),  
57  
58  
59  
60



after adjusting for confounders (See table 4).

### **Biological interaction of sleep quality and sleep duration on the prevalence of IFG**

We used a combined effects method to assess interaction, with the  $p$  value of the interaction term indicating statistical significance of additive interactions. Individuals with poor sleep quality or short sleep duration had significantly increased risk of IFG compared with those with good sleep quality and sleep duration 6–8 h (OR: 2.48; 95% CI: 2.12–3.03; OR: 2.79; 95% CI: 2.19–3.58; respectively. all  $P < 0.001$ ), after adjusting for confounders. Table 5 shows the results from the multiple logistic regression models. The prevalence of IFG was greatest in those with poor sleep quality and short sleep duration (OR: 6.37; 95% CI: 4.66–8.67;  $p < 0.001$ ), after adjusting for confounders. In addition, individuals with long sleep duration had a significantly increased risk of IFG compared with those who had good sleep quality and sleep duration of 6–8 h (OR: 2.37; 95% CI: 1.89–2.96;  $p < 0.001$ ), after adjusting for confounders. The prevalence of IFG was also greater in those with good sleep quality with long sleep duration (OR: 3.17; 95% CI: 2.29–4.41;  $p < 0.001$ ), compared with those with 6–8 h sleep duration, after adjusting for confounders.

### **Sensitivity analysis**

There was a strong additive interaction between poor sleep quality and short sleep duration (RERI: 1.69; 95% CI: 0.31–3.76.), with 42% of occurring IFG attributed to the interaction between poor sleep quality and short sleep duration (Table 5). There was also interaction between good sleep quality and long sleep duration (RERI: 0.78; 95% CI: 0.12–1.43), with 61% of occurring IFG attributed to the interaction between good sleep quality and long sleep duration (Table 6).

### **Discussion**

The two main findings of this study were, firstly, that there is combined interaction of poor sleep quality and short sleep duration on the prevalence of IFG. Secondly, that total PSQI scores of volunteers with IFG were higher than those of volunteers with NGT. We also found that poor sleep quality and short or long sleep duration increased risk for IFG in a Chinese population, independent of potential confounders such as age, obesity, family history of diabetes, alcohol consumption, smoking, physical activity, and other diseases.

Numerous epidemiologic studies have demonstrated associations between short or long sleep duration and sleep disturbances and diabetes.<sup>17–23</sup> However, few articles focused on IFG, and the results of these are inconsistent.<sup>5,24</sup> Rafalson et al.<sup>5</sup> reported the OR of IFG among short sleepers was 3.0 (95% CI: 1.05–8.59) compared with mid-range sleepers with multivariate conditional logistic regression after adjustment for several diabetes risk factors. Hung et al.<sup>24</sup> reported no association between IFG and poor sleepers. Our findings are



consistent with the report by Rafalson et al.

1 The global PSQI scores in volunteers with IFG were higher than those in volunteers with  
2 NGT, which was consistent with the Hung et al. report.<sup>24</sup> However, there was no difference in  
3 sleep duration scores between the volunteers with IFG and the volunteers with NGT. This  
4 could be attributed to the fact that 18.3% (116/634) of the volunteers with IFG were long  
5 sleepers, while short sleepers with IFG only accounted for 22.9% (145/634).  
6  
7

8 Short sleep duration increases appetite. After four nights of 4.5 h in bed, compared with  
9 after four nights of 8.5 h in bed, caloric intake, especially of carbohydrate-rich nutrients,  
10 increased by 14% in young normal-weight men and women.<sup>25, 26</sup> Middle-aged obese  
11 volunteers submitted to four to five nights of restriction of their habitual sleep schedule by  
12 2–3 h/night ate 15% more calories than those whose habitual sleep schedule was extended by  
13 the same amount.<sup>27</sup> In volunteers with sleep debt, glucose tolerance, glucose effectiveness and  
14 insulin sensitivity are decreased, and beta-cell function is reduced.<sup>6,26,28,29</sup> Sleep loss also  
15 results in decreased anorexigenic leptin levels,<sup>30-32</sup> especially in volunteers with chronic sleep  
16 restriction.<sup>33</sup> Observational epidemiologic studies have also shown reduced leptin levels, after  
17 controlling for BMI or adiposity, in habitual short sleepers.<sup>33, 34</sup> Conversely, leptin deficiency  
18 disrupts sleep architecture and impairs sleep consolidation.<sup>35</sup> Taken together, these data  
19 suggest that sleep loss is likely to have a profound impact on IFG.  
20  
21

22 Poor sleep quality, independent of sleep duration, impairs glucose regulation in healthy  
23 young adults.<sup>36, 37</sup> After three nights of slow-wave sleep suppression, insulin sensitivity is  
24 decreased by ~25%, reaching the level reported in older adults and in populations at high risk  
25 of diabetes.<sup>38</sup> The decrease in insulin sensitivity is not compensated for by an increase in  
26 insulin release. Consequently, the disposition index is ~20% lower. Consistent with an  
27 increased diabetes risk, glucose tolerance is reduced by ~23% reaching the range typical of  
28 older adults with impaired glucose tolerance.<sup>37</sup> Sleep fragmentation also increases  
29 sympathetic activity, which in turn leads to disorders of glucose metabolism.<sup>39</sup>  
30  
31

32 Taken together, short sleep duration, increased caloric intake, poor sleep quality,  
33 decreased leptin levels, decreased insulin sensitivity and increased sympathetic activity affect  
34 each other, creating a vicious circle, which elevates the risk of IFG.  
35  
36

37 Despite the absence of the synergistic effect of good-quality sleep with long sleep  
38 duration, a strong association of IFG with long sleep duration in individuals was observed,  
39 suggesting an independent effect of long sleep duration.  
40  
41

42 This study had several potential limitations. Firstly, because of the cross-sectional design,  
43 we could not determine a causal relationship between sleep quality, sleep duration and IFG.  
44 Secondly, we were not able to control for some important and well-known risk factors of  
45 diabetes, for example, snoring.<sup>40</sup> Thirdly, we did not measure poor diet, which is causally  
46 related to type 2 diabetes and may also influence sleep patterns.<sup>41,42</sup>  
47  
48

49 There are several notable strengths of this study. Participants were randomly selected  
50  
51  
52  
53  
54  
55  
56  
57  
58  
59  
60

from the general population of Xuzhou. In addition, the sample was large. Many confounding risk factors were adjusted for.

In summary, volunteers who experience short sleep durations are six times more likely to develop IFG than those whose average sleep was 6–8 h a night with good sleep quality. The joint effect of short sleep duration and poor sleep quality was positive.

For peer review only

### Acknowledgments

1 This research was funded by the Preventive Medicine research projects of Jiangsu Province  
2 Health Department in 2012 (Y2012025) and the Science and Technology projects of Xuzhou  
3 City in 2011 (XF11C090). Double-Hundred Talents Project of Xuzhou city in  
4 2012(BRA201224)  
5  
6  
7  
8

9 **Contributors** Steering Committee: PL (principal investigator), PC (principal investigator),  
10 PC and LZ. Operating Committee: LZ,PZ, GC, NZ, TL and CQ.  
11

### Conflict of Interest Statement

12 None of the authors have a financial relationship with a commercial entity that has an interest  
13 in the subject of this manuscript. The researchers were independent from funders. The study  
14 funders had no influence on the study design, data collection, analysis, interpretation of data,  
15 writing of the report, or decision to submit the article for publication.  
16  
17  
18  
19  
20  
21

### Data Sharing Statement

22 Our material is original, has not been published except in abstract form, and is not being  
23 considered for publication elsewhere, including publicly accessible websites or e-print servers,  
24 no part of the research presented has been funded by tobacco industry sources, and all authors  
25 have read the manuscript and approve its submission.  
26  
27  
28  
29  
30  
31  
32  
33  
34  
35  
36  
37  
38  
39  
40  
41  
42  
43  
44  
45  
46  
47  
48  
49  
50  
51  
52  
53  
54  
55  
56  
57  
58  
59  
60

**References**

1. Yang W, Lu J, Weng J, et al. China National Diabetes and Metabolic Disorders Study Group. Prevalence of diabetes among men and women in China. *N Engl J Med* 2010; 362:1090-1 101.
2. Li G, Zhang P, Wang J, et al. The long-term effect of lifestyle interventions to prevent diabetes in the China Da Qing Diabetes Prevention Study: a 20-year follow-up study. *Lancet* 2008; 24;371(9626):1783-9.
3. Lou P, Chen P, Yu J, et al. Analysis on the risk factors of the residents with impaired fasting glucose in Xuzhou. *Chin J Dis Control Prev* 2011; 15( 3) : 192-195. (In Chinese)
4. Najafian J, Mohamadifard N, Siadat ZD, et al. Association between sleep duration and diabetes mellitus: Isfahan Healthy Heart Program. *Niger J Clin Pract* 2013; 16(1):59-62.
5. Rafalson L, Donahue RP, Stranges S, et al. Short sleep duration is associated with the development of impaired fasting glucose: the Western New York Health Study. *Ann Epidemiol* 2010; 20(12):883-9.
6. Spiegel K, Leproult R, Van Cauter E. Impact of sleep debt on metabolic and endocrine function. *Lancet* 1999; 354:1435-9.
7. Lou P, Chen P, Zhang L, et al. Relation study of sleep quality and sleep duration to type 2 diabetes: a population-based cross-sectional survey. *BMJ Open* 2012; 2:e000956.13.
8. Wu H, Lou P, Chen P, et al. survey the relationship between sleep quality and T2DM. *Chin J Diabetes* 2013; 21(4): 330-333. (In Chinese)
9. Chen P, Lou P, Yu J, et al. Risk factors of diabetes mellitus of residents living in Xuzhou city. *Chin J Health Manage* 2010; 4:78-80. (In Chinese)
10. Buysse DJ, Reynolds CF 3rd, Monk TH, et al. The Pittsburgh Sleep Quality Index: a new instrument for psychiatric practice and research. *Psychiatry Res* 1989; 28(2): 193–213.
11. Diagnosis and classification of diabetes mellitus. *Diabetes Care*, 2010. 33 Suppl 1: p. S62-9
12. Tsai, PS, Wang, SY, Wang, MY, et al. Psychometric evaluation of the Chinese version of the Pittsburgh Sleep Quality Index (CPSQI) in primary insomnia and control subjects. *Qual Life Res* 2005; 14(8):1943–1952.

- 1  
2  
3  
4  
5  
6  
7  
8  
9  
10  
11  
12  
13  
14  
15  
16  
17  
18  
19  
20  
21  
22  
23  
24  
25  
26  
27  
28  
29  
30  
31  
32  
33  
34  
35  
36  
37  
38  
39  
40  
41  
42  
43  
44  
45  
46  
47  
48  
49  
50  
51  
52  
53  
54  
55  
56  
57  
58  
59  
60
13. Cooperative Meta-analysis Group of China Obesity Task Force. Predictive values of body mass index and waist circumference to risk factors of related disease in Chinese adult population. *Chin J Epidemiol* 2002; 23: 5-10.
14. Rothman KJ, Greenland S, Lash T L. *Modern epidemiology*, 3rd edition [M]. Philadelphia: Lippincott Williams & Wilkins, 2008.
15. Hosmer DW, Lemeshow S. Confidence interval estimation of interaction. *Epidemiology* 1992; 3(5):452-456.
16. Knol MJ, VanderWeele TJ, Groenwold RHH, et al. Estimating measures of interaction on an additive scale for preventive exposures. *Eur J Epidemiol* 2011; 26(6):433-438.
17. Gottlieb DJ, Punjabi NM, Newman AB, et al. Association of sleep time with diabetes mellitus and impaired glucose tolerance. *Arch Intern Med* 2005 ;165: 863-868.
18. Yaggi HK, Araujo AB, McKinlay JB. Sleep duration as a risk factor for the development of type 2 diabetes. *Diabetes Care* 2006; 29: 657-661
19. Hayashino Y, Fukuhara S, Suzukamo Y, et al. Relation between sleep quality and quantity, quality of life, and risk of developing diabetes in healthy workers in Japan: the High-risk and Population Strategy for Occupational Health Promotion (HIPOP-OHP) Study. *BMC Public Health* 2007;7: 129.
20. Shankar A, Syamala S, Kalidindi S. Insufficient Rest or Sleep and Its Relation to Cardiovascular Disease, Diabetes and Obesity in a National, Multiethnic Sample. *PLoS ONE* 2010; 5(11): e14189.
21. Mallon L, Broman JE, Hetta J. High Incidence of Diabetes in Men With Sleep Complaints or Short Sleep Duration -A 12-year follow-up study of a middle-aged population. *Diabetes Care* 2005;28:2762-2767.
22. Nilsson PM, RÖÖst M, Engström M, et al. Incidence of Diabetes in Middle-Aged Men Is Related to Sleep Disturbances. *Diabetes Care* 2004;27:2464-2469.
23. Vgontzas AN, Liao D, Pejovic S, et al. Insomnia With Objective Short Sleep Duration Is Associated With Type 2 Diabetes : A population-based study. *Diabetes Care* 2009;32:1980-1985.
24. Hung HC, Yang YC, Ou HY, et al. The relationship between impaired fasting glucose and

self-reported sleep quality in a Chinese population. *Clin Endocrinol (Oxf)*

2013;78(4):518-24.

25. Tasali E, Leproult R, Spiegel K. Reduced sleep duration or quality: relationships with insulin resistance and type 2 diabetes. *Prog Cardiovasc Dis* 2009; 51:381–391.
26. Nedeltcheva AV, Kessler L, Imperial J, et al. Exposure to recurrent sleep restriction in the setting of high caloric intake and physical inactivity results in increased insulin resistance and reduced glucose tolerance. *J Clin Endocrinol Metabol* 2009; 94:3242–3250.
27. Morselli L, Balbo M, Van Cauter E, et al. Impact of sleep restriction on the regulation of appetite in middle-aged obese subjects. 4th International World Sleep Congress; Quebec City, Québec. 2011.
28. Buxton OM, Pavlova M, Reid EW, et al. Sleep restriction for 1 week reduces insulin sensitivity in healthy men. *Diabetes* 2010; 59:2126–2133.
29. Simpson NS, Banks S, Dinges DF. Sleep restriction is associated with increased morning plasma leptin concentrations, especially in women. *Biol Res Nurs* 2010; 12:47–53.
30. Guilleminault C, Powell NB, Martinez S, et al. Preliminary observations on the effects of sleep time in a sleep restriction paradigm. *Sleep Med.* 2003; 4:177–184.
31. Spiegel K, Leproult R, L'hermite-Balériaux M, et al. Leptin levels are dependent on sleep duration: relationships with sympathovagal balance, carbohydrate regulation, cortisol, and thyrotropin. *J Clin Endocrinol Metabol* 2004; 89(11):5762–5771.
32. Spiegel K, Tasali E, Penev P, et al. Sleep curtailment in healthy young men is associated with decreased leptin levels, elevated ghrelin levels, and increased hunger and appetite. *Ann Intern Med* 2004; 141:846–850.
33. Taheri S, Lin L, Austin D, et al. Short sleep duration is associated with reduced leptin, elevated ghrelin, and increased body mass index. *PLoS Med* 2004; 1:e62.
34. Chaput JP, Despres JP, Bouchard C, et al. Short sleep duration is associated with reduced leptin levels and increased adiposity: results from the Quebec family study. *Obesity (Silver Spring, Md)* 2007; 15:253–261.
35. Laposky AD, Shelton J, Bass J, et al. Altered sleep regulation in leptin-deficient mice. *Am*

J Physiol Regul Integr Comp Physiol 2006; 290:R894–R903.

- 1  
2  
3  
4  
5  
6  
7  
8  
9  
10  
11  
12  
13  
14  
15  
16  
17  
18  
19  
20  
21  
22  
23  
24  
25  
26  
27  
28  
29  
30  
31  
32  
33  
34  
35  
36  
37  
38  
39  
40  
41  
42  
43  
44  
45  
46  
47  
48  
49  
50  
51  
52  
53  
54  
55  
56  
57  
58  
59  
60
36. Stamatakis KA, Punjabi NM. Effects of sleep fragmentation on glucose metabolism in normal subjects. *Chest* 2010; 137:95–101.
37. Tasali E, Leproult R, Ehrmann DA, et al. Slow-wave sleep and the risk of type 2 diabetes in humans. *Proc Natl Acad Sci USA* 2008; 105:1044–1049.
38. Bergman RN. Lilly lecture 1989. Toward physiological understanding of glucose tolerance. Minimal-model approach. *Diabetes* 1989; 38:1512–1527
39. Peltier AC, Consens FB, Sheikh K, et al. Autonomic dysfunction in obstructive sleep apnea is associated with impaired glucose regulation. *Sleep Medicine* 2007.8(2): 149–155.
40. Al-Delaimy WK, Manson JE, Willett WC, et al. Snoring as a risk factor for type II diabetes mellitus: a prospective study. *Am J Epidemiol* 2002 ;155:387–393,
41. Tonstad SMD, Butler T, Yan R, et al. Type of Vegetarian Diet, Body Weight, and Prevalence of Type 2 Diabetes. *Diabetes Care* 2009;32(8):791-796.
42. Grandner MA, Kripke DF, Naidoo N, et al. Langer Relationships among dietary nutrients and subjective sleep, objective sleep, and napping in women. *Sleep Med* 2010; 11: 180.

**Table 1** Baseline characteristics of the study population (N = 15,145)

| Reported variable                 | All       | IFG            |             |        |
|-----------------------------------|-----------|----------------|-------------|--------|
|                                   |           | No             | Yes         | P      |
|                                   | 15145     | 14,511(95.81%) | 634(4.19%)  |        |
| Age(years)                        | 47.6±15.1 | 47.4±14.7      | 52.2±16.2   | 8.012  |
| ≥45 years                         | 8362      | 7928(94.81%)   | 434(5.19%)  | 0.000  |
| Sex(% man)                        | 49.9      | 50.0           | 49.8        | 0.938  |
| Rural (%)                         | 72.4      | 72.4           | 72.9        | 0.795  |
| Manual                            | 10833     | 10359(95.62%)  | 474(4.38%)  | 0.023  |
| Non-manual                        | 1045      | 1016(97.22%)   | 29(2.78%)   |        |
| Unemployed                        | 677       | 658(97.19%)    | 19(2.81%)   |        |
| retired                           | 2590      | 2478(95.68%)   | 112(4.32%)  |        |
| Married (living with partners)(%) | 88.5      | 88.6           | 86.3        | 0.073  |
| Below high school                 | 11899     | 11400(95.81%)  | 499(4.19%)  | 0.986  |
| high school                       | 1760      | 1686(95.80%)   | 74(4.20%)   |        |
| Above high school                 | 1486      | 1425(95.90%)   | 61(4.10%)   |        |
| smoker                            | 3541      | 3367(95.09%)   | 174(4.91%)  | 0.014  |
| alcohol use                       | 2872      | 2752(95.82%)   | 120(4.18%)  | 0.981  |
| Regular exercise                  | 2559      | 2452(95.82%)   | 107(4.18%)  | 0.989  |
| Family history of diabetes        | 483       | 362(74.95%)    | 121(25.05%) | 0.000  |
| BMI, mean(SD)                     | 23.9±4.7  | 23.8±5.8       | 25.2±4.1    | <0.001 |
| Central obesity                   | 4613      | 4219(91.46%)   | 394(8.54%)  | 0.000  |
| Hypertension                      | 3060      | 2901(94.80%)   | 159(5.20%)  | 0.002  |
| Sleep duration(hour)              |           |                |             |        |
| ≤6                                | 1984      | 1839(92.70%)   | 145(7.30%)  | 0.000  |
| 6-8                               | 11292     | 10919(96.70%)  | 373(3.30%)  |        |
| ≥8                                | 1869      | 1753(93.80%)   | 116(6.20%)  |        |
| Sleep quality                     |           |                |             |        |
| Good                              | 11209     | 10840(96.71%)  | 369(3.29%)  | 0.000  |
| Poor                              | 3936      | 3671(93.27%)   | 265(6.73%)  |        |



Table 2. Comparison of characteristics between individuals with poor sleep quality and sleep duration &lt;6h and controls

| Reported variable                | All       | Poor sleep quality with short sleep time(<6h) |               |      |
|----------------------------------|-----------|-----------------------------------------------|---------------|------|
|                                  |           | Yes                                           | No            | P    |
|                                  | 15145     | 602                                           | 14543         |      |
| Age(years)                       | 47.6±15.1 | 47.8±15.5                                     | 47.5±15.1     | 0.63 |
| Sex(man)                         | 7557      | 299(3.96%)                                    | 7258(96.04%)  | 0.91 |
| Rural                            | 10965     | 435(3.97%)                                    | 10530(96.03%) | 0.94 |
| Manual                           | 10833     | 421(3.89%)                                    | 10412(96.11%) | 0.38 |
| Non-manual                       | 1045      | 44(4.21%)                                     | 1001(95.79%)  | 0.69 |
| Unemployed                       | 677       | 35(5.17%)                                     | 642(94.83%)   | 0.10 |
| retired                          | 2590      | 102(3.94%)                                    | 2488(96.06%)  | 0.92 |
| Marred (living with partners)(%) | 13403     | 535(3.99%)                                    | 12868(96.01%) | 0.77 |
| Below high school                | 11899     | 470(3.95%)                                    | 11429(96.05%) | 0.76 |
| high school                      | 1760      | 70(3.98%)                                     | 1690(96.02%)  | 1    |
| Above high school                | 1486      | 62(4.17%)                                     | 1424(95.83%)  | 0.68 |
| smoker                           | 3541      | 145(4.09%)                                    | 3396(95.91%)  | 0.68 |
| alcohol use                      | 2872      | 121(4.21%)                                    | 2751(98.79%)  | 0.48 |
| Regular exercise                 | 2559      | 92(3.60%)                                     | 2467(96.40%)  | 0.28 |
| Family history of diabetes       | 483       | 20(4.14%)                                     | 463(95.86%)   | 0.85 |
| BMI, mean(SD)                    | 23.9±4.7  | 24.0±4.9                                      | 23.9±4.6      | 0.60 |
| Central obesity                  | 4613      | 186(4.03%)                                    | 4427(95.97%)  | 0.81 |
| Hypertension                     | 3060      | 131(4.28%)                                    | 2929(95.72%)  | 0.33 |

**Table 3** Comparison of Pittsburgh Sleep Quality Index scores between individuals with impaired fasting glucose and controls ( $\bar{x}$   $\pm$  sd)

| <i>Items</i>             | <i>IFG</i>        |                   | <i>F value</i> | <i>P</i> |
|--------------------------|-------------------|-------------------|----------------|----------|
|                          | No                | Yes               |                |          |
| Subjective sleep quality | 0.415 $\pm$ 0.013 | 0.463 $\pm$ 0.03  | 31.823         | 0.000    |
| Sleep latency            | 0.742 $\pm$ 0.004 | 0.800 $\pm$ 0.016 | 27.446         | 0.000    |
| Sleep duration           | 0.152 $\pm$ 0.002 | 0.159 $\pm$ 0.001 | 0.503          | 0.478    |
| Sleep efficiency         | 0.444 $\pm$ 0.003 | 0.321 $\pm$ 0.001 | 29.452         | 0.000    |
| Sleep disturbance        | 0.591 $\pm$ 0.003 | 0.658 $\pm$ 0.012 | 28.259         | 0.000    |
| Use of hypnotic          | 0.051 $\pm$ 0.002 | 0.065 $\pm$ 0.007 | 16.651         | 0.000    |
| Daytime dysfunction      | 0.147 $\pm$ 0.011 | 0.170 $\pm$ 0.002 | 9.725          | 0.000    |
| Global PSQI scores       | 2.302 $\pm$ 0.009 | 2.495 $\pm$ 0.041 | 20.957         | 0.000    |

Using analysis of covariance, Covariates for age =47.6 years old

Table 4 Odds ratios for the association between sleep quality, sleep duration and impaired fasting glucose among participants

| Variables      |      | IFG | No IFG | OR (95%CI)       | P     |
|----------------|------|-----|--------|------------------|-------|
| Sleep quality  | Good | 369 | 10840  | 1                | 0.000 |
|                | Poor | 265 | 3671   | 1.21(1.09-1.34)  |       |
| Sleep duration | 6-8h | 373 | 10919  | 1                | 0.000 |
|                | <6h  | 145 | 1839   | 2.16 (1.33-3.47) |       |
|                | >8h  | 116 | 1753   | 1.89 (1.50-2.34) |       |

Adjusted for age, sex, education, employment, BMI, family history of diabetes, smoking status, alcohol consumption and physical activity.

**Table 5** Odds ratios for the association between sleep quality and impaired fasting glucose by sleep duration among participants

| <i>Sleep duration</i> | <i>Sleep quality</i> | <i>IFG</i> | <i>No IFG</i> | <i>OR (95%CI)</i> | <i>P</i> |
|-----------------------|----------------------|------------|---------------|-------------------|----------|
| 6-8h                  | Good                 | 246        | 8743          | 1                 |          |
|                       | Poor                 | 127        | 2176          | 1.98 (1.76-2.52)  | <0.001   |
| <6h                   | Good                 | 53         | 1329          | 1.38 (1.12-1.61)  | <0.001   |
|                       | Poor                 | 92         | 510           | 6.37 (4.66-8.67)  | <0.001   |
| >8h                   | Good                 | 70         | 768           | 3.17 (2.29-4.41)  | <0.001   |
|                       | Poor                 | 46         | 985           | 1.59 (1.08-2.29)  | <0.001   |

Adjusted for age, sex, education, employment, BMI, family history of diabetes, smoking status, alcohol consumption and physical activity.

**Table 6** Measures for estimation of the biological interaction between sleep quality and sleep duration for the prevalence of impaired fasting glucose in participants

| Measures of biological interaction            | Estimate (95% CI)  |
|-----------------------------------------------|--------------------|
| Poor sleep quality versus sleep duration < 6h |                    |
| RERI                                          | 1.69(0.31–3.76)    |
| AP                                            | 0.42(0.15–0.61)    |
| S                                             | 2.85(2.14–3.92)    |
| Good sleep quality versus sleep duration > 8h |                    |
| RERI                                          | 0.78(0.12–1.43)    |
| AP                                            | 0.61(0.26–0.87)    |
| S                                             | -0.65(-0.94–-0.27) |

Reference group is good sleep quality with 6-8 sleep duration.

Adjusted for age, sex, education, occupation, BMI, family history of diabetes, smoking status, alcohol consumption, and hypertension.

**Interaction of sleep quality and sleep duration on impaired fasting glucose:****A population-based cross-sectional survey in China**

**Peian Lou<sup>\*</sup>, Peipei Chen, Lei Zhang, Pan Zhang, Guiqiu Chang, Ning Zhang, Ting Li, Cheng Qiao**

Department of Control and Prevention of Chronic Non-communicable Diseases, Xuzhou  
Center for Disease Control and Prevention, Xuzhou, School of Public Health, Xuzhou  
Medical University, China

**\*Corresponding author:** Peian Lou, phone: 0516-85956785, fax: 0516-89596797

42 West Erhuan Road, Xuzhou City, Jiangsu Province, China

E-mail: lpa82835415@126.com

**Key words:** Interaction; Sleep quality; Sleep duration; Impaired fasting glucose

**Word count:** 2543

**Abstract**

**Objectives:** To explore the interactions of sleep quality and sleep duration and their effects on impaired fasting glucose in Chinese adults.

**Design:** Cross-sectional survey.

**Setting:** Community-based investigation in Xuzhou, China.

**Participants:** 15,145 Chinese men and women aged 18–75 years old who fulfilled the inclusion criteria.

**Primary and secondary outcome measures:** The Pittsburgh Sleep Quality Index was used to produce sleep quality categories of good, common and poor. Fasting blood glucose levels were assessed for impaired fasting glucose. Sleep duration was measured by average hours of sleep per night, with categories of <6 h, 6–8 h, and >8 h. The products of sleep and family history of diabetes, obesity and age were added to the logistic regression model to evaluate the additive interaction and relative excess risk of interaction (RERI) on impaired fasting glucose. The attributable proportion (AP) of the interaction and the synergy index (S) were applied to evaluate the additive interaction of two factors. Bootstrap measures were used to calculate 95% confidence intervals (CI) of RERI, AP and S.

**Results:** The prevalence of IFG was greatest in those with poor sleep quality and short sleep duration (OR: 6.37; 95% CI: 4.66–8.67;  $p < 0.001$ ) compared with those who had good sleep quality and 6–8 h sleep duration, after adjusting for confounders. After adjusting for potential confounders, RERI, AP and S values (and their 95% CI) were 1.69 (0.31–3.76), 0.42 (0.15–0.61) and 2.85 (2.14–3.92) for the interaction between poor sleep quality and short sleep duration, and 0.78 (0.12–1.43), 0.61 (0.26–0.87) and –65 (–0.94 to –0.27) for the interaction between good sleep quality and long sleep duration.

**Conclusions:** The results suggest that there are additive interactions between poor sleep quality and short sleep duration.

**ARTICLE SUMMARY**

## Article focus

- To describe the combined effects of sleep duration and sleep quality for impaired fasting glucose in people in Xuzhou, China.

## Key messages

- There exist additive interactions between sleep quality and sleep duration on impaired fasting glucose.

- A strength of the study is the large sample.

- Limitations of the study the cross-sectional design.

## Introduction

Prediabetes has a prevalence of 15.5% and affects an estimated 148.2 million Chinese adults.<sup>1</sup> Prediabetes, including impaired fasting glucose (IFG) and impaired glucose tolerance (IGT), is the most important risk factor for type 2 diabetes. The average annual incidence of diabetes in a cohort of patients with IFG is 11% over a six-year period without intervention.<sup>2</sup> Older age, a family history of diabetes, being overweight, obesity, central obesity, increased heart rate, elevated systolic blood pressure, elevated serum triglyceride levels, high income, history of hypertension, history of coronary heart disease, history of drinking, eating pickled foods, and low educational level are significantly associated with an increased risk of prediabetes.<sup>1,3</sup> Increasingly, studies have shown that prediabetes is associated with poor sleep quantity and quality.<sup>3,4</sup> A cross-sectional study has suggested that, compared with those sleeping 7–8 h per night, individuals aged <60 years who slept 5 h or less had an increased odds ratio (OR) for IGT (OR: 1.37, 95% confidence interval [CI]: 1.13–1.67).<sup>4</sup> The Western New York Health Study including 1455 participants showed that sleep duration of less than 6 h was associated with increased prevalence of IFG, compared with those sleeping 6–8 h per night, after adjustment for confounders, over six years of follow up.<sup>5</sup> Spiegel et al. have demonstrated that experimental restriction of sleep to <4 h per night for six nights resulted in an impaired glucose tolerance (IGT) in young healthy adults.<sup>6</sup>

Our previous results suggest that poor quality of sleep and sleep duration <6 h per night are independent risk factors for type 2 diabetes, even after adjusting for a large number of possible confounders.<sup>7,8</sup> Our previous study also confirmed that relatively healthy individuals with poor sleep quality and sleeping times of 6 h or less had a higher risk of IFG, even after adjusting for a large number of confounding factors.<sup>3</sup>

Although these risk factors play a role in the development of type 2 diabetes, the disease is the result of the interaction of genetic and environmental factors. There is little understanding of multivariate explanations of IFG in relatively healthy individuals. To our knowledge, there are no studies on the interaction of sleep quality and sleep duration on IFG in relatively healthy individuals. The primary aim of this cross-sectional study was to examine the combined effects of sleep quality and sleep duration on IFG in relatively healthy individuals in a Chinese primary-care setting. A secondary aim was to assess the associations of sleep quality and IFG, and of sleep duration and IFG.

## Methods

The study was a continuation of our previous work.<sup>9</sup> The investigation was conducted from March to November 2012 with a sample size of 15,145 volunteers (7557 men and 7588 women) aged 18 to 75 years. Briefly, the sampling was selected with probability proportional



1 to size from all of the eleven regions in Xuzhou city. In the first stage, 5  
2 subdistricts/townships in urban/rural areas were selected from each region. In the second  
3 stage, 5 communities/ villages were selected from each subdistricts/townships. In the final  
4 stage, one person who was at least 18 years old and lived in the current residence for at least 5  
5 years was selected from each household using a Kish selection table. A total of 16500 people  
6 were selected assuming an estimation prevalence of diabetes of 5.5% with 90% power and  
7  $\alpha=0.05$  and allowing for a drop-out of 10%. All volunteers received a health check and  
8 completed a structured questionnaire covering demographic information, medical history,  
9 medication history, sleep assessment, and smoking, alcohol drinking and exercise habits. All  
10 volunteers underwent 12-h overnight fasting and blood sampling for basic fasting plasma  
11 glucose (FPG). After blood sampling, each volunteer completed the Pittsburgh Sleep Quality  
12 Index (PSQI).<sup>10</sup> We excluded volunteers who were pregnant, had received antihypertensive  
13 medication, or were suffering from any cardiovascular disease, stroke, neuropathy, psychosis,  
14 depression, chronic obstructive pulmonary disease, obstructive sleep apnea, diabetes, ache, or  
15 any other disease. Those who had missing information on sleep duration or sleep quality were  
16 also excluded. Trained physicians and public health workers conducted face-to-face  
17 interviews using a standardized questionnaire to collect socio-demographic, lifestyle and  
18 health-related information.  
19  
20  
21  
22  
23  
24  
25  
26  
27  
28  
29  
30  
31  
32  
33  
34  
35  
36  
37  
38

39 The study protocol was approved by the Xuzhou Center for Disease Control and  
40 Prevention. All participants provided written informed consent.  
41  
42  
43

#### 44 **Key measurements**

45 The FPG was determined by morning blood samples obtained by venipuncture after an  
46 overnight fast of at least 12h, and extracted plasma was stored at  $-70^{\circ}\text{C}$  for later glucose  
47 determination by the hexokinase method. According to the current WHO definition of IFG<sup>11</sup>.  
48  
49

50 The PSQI is a validated self-rated questionnaire that assesses sleep quality over a  
51 one-month time interval.<sup>10</sup> Nineteen items generate seven component scores that reflect sleep  
52 problems in the areas of subjective sleep quality, sleep latency, sleep duration, habitual sleep  
53 efficiency, sleep disturbances, use of sleep medications and daytime dysfunction. The sum of  
54 the scores for these seven components produces a global sleep quality score within a range of  
55 0–21 points. A global PSQI score  $>5$  has a diagnostic sensitivity of 89.6% and specificity of  
56 86.5% in differentiating poor from good sleepers. The Chinese version of the PSQI used with  
57  
58  
59  
60

1 permission from the original PSQI authors, has an overall reliability coefficient of 0.82–0.83  
2 and acceptable test–retest reliability, with a coefficient of 0.77–0.85.<sup>12</sup> Accordingly, in this  
3 study design, a PSQI score  $\leq 5$  was also conventionally defined as ‘good sleep quality’, and a  
4 PSQI score  $> 5$  was defined as ‘poor sleep quality’  
5

6 Self-reported sleep measures of chronic sleep. Two variables were used to evaluate degree  
7 of “chronic sleep restriction” by estimating average nightly sleep duration: (i) “usual sleep”  
8 (from questionnaires) and (ii) “average nightly sleep” (from sleep diaries). Sleep quantity was  
9 categorized as  $<6$ ,  $6-8$ , and  $>8$  h per night accordance with our previous study.<sup>3,7,8</sup>  
10  
11  
12

### 13 **Covariates**

14 Age, gender, current employment status, level of education, cigarette smoking, alcohol  
15 intake, physical activity, family history of diseases including diabetes, hypertension, heart  
16 disease, and cancer were assessed using a standardized questionnaire. Employment status was  
17 categorized as manual, non-manual, unemployed, and retired. Education was categorized into  
18 below high school, high school, or above high school education. Lifestyle variables included  
19 cigarette smoking, alcohol drinking and physical activity level. Cigarette smoking was  
20 defined as having smoked at least 100 cigarettes in a lifetime. Information was obtained on  
21 the amount and type of alcohol that was consumed during the previous year, and alcohol  
22 drinking was defined as the consumption of at least 30 g of alcohol per week for one year or  
23 more. Regular leisure-time physical activity was defined as participating in moderate or  
24 vigorous activity for no less than 30 minutes per day at least three days a week. Each  
25 volunteer’s body height (to the nearest 0.1 cm) and weight (to the nearest 0.1 kg) in light  
26 indoor clothing were measured. Body mass index (BMI; in  $\text{kg}/\text{m}^2$ ) was calculated. BMI was  
27 categorized as underweight ( $<18.5 \text{ kg}/\text{m}^2$ ), normal weight ( $18.5-24.0 \text{ kg}/\text{m}^2$ ) and  
28 overweight/obese ( $>24.0 \text{ kg}/\text{m}^2$ ).<sup>13</sup>  
29  
30  
31  
32  
33  
34  
35  
36  
37  
38  
39  
40  
41  
42

### 43 **Statistical analysis**

44 Statistical analysis was performed on a computer, using the statistical analysis program  
45 SPSS 13.0 (SPSS, Chicago, IL, USA). Mean differences of continuous variables between  
46 groups were tested using analysis of variance (ANOVA). The chi-squared test was used to  
47 calculate the difference in proportions between groups. Logistic regression analysis was  
48 performed to estimate the probability of having IFG and 95% CI for each risk factor category  
49 stratified by sleep quality and sleep duration, adjusting for age, residential areas, occupation,  
50 education and income levels, leisure-time physical activity, smoking status, drinking status  
51 and hypertension status. The observed prevalences of IFG were plotted and stratified by sleep  
52 quality and sleep duration.  
53  
54  
55  
56  
57  
58  
59  
60

Biological interactions should be based on the sum of the scale rather than multiplying  
the scale.<sup>14,15</sup> Therefore, we used three measures to estimate biological interactions of poor

1 sleep quality and short sleep duration: relative excess risk owing to interaction (RERI), the  
2 attributable proportion (AP) owing to interaction, and the synergy index (S). The RERI is the  
3 excess risk attributed to interaction relative to the risk without exposure to poor sleep quality  
4 and short sleep duration. AP refers to the attributable proportion of disease caused by  
5 interaction in subjects with exposure to both variables. S is the excess risk from exposure to  
6 both variables when there is a biological interaction relative to the risk from exposure to both  
7 variables without interaction. In the absence of additive interactions, RERI and AP are equal  
8 to 0.<sup>16</sup> In the current study,  $RERI > 0$ ,  $AP > 0$  and  $S > 0$  indicate statistical significance. A  $p$   
9 value  $< 0.05$  (two-tailed) was considered statistically significant.  
10  
11  
12  
13  
14

## 15 Results

### 16 General characteristics of participants

17 The response rate was 91.3%. Of the 16584 initial participants, 125 did not respond to the  
18 sleep items or blood glucose, 1314 did not meet our study criteria, 15,145 adults (7557 men  
19 and 7588 women) with complete data were included in our analysis. The average sleep  
20 duration per night was  $7.16 \pm 1.06$ h. The average age was  $47.6 \pm 15.1$  years. Among them,  
21 634 had IFG; the remainder had normal glucose tolerance (NGT). The characteristics of the  
22 study population are presented in Table 1. **The characteristics between individuals with poor  
23 sleep quality and sleep duration  $< 6$ h and controls are presented in Table 2.** The proportion  
24 of volunteers with poor sleep quality was 26.0%, the proportion with sleep duration  $< 6$  h was  
25 12.5%, the proportion with sleep duration  $> 8$  h was 12.3%. The 6.7% prevalence of IFG in  
26 volunteers with poor sleep quality was higher than that in volunteers with good sleep quality  
27 ( $\chi^2 = 85.98$ ,  $p < 0.001$ ). Individuals with sleep duration  $< 6$  h had a higher IFG prevalence  
28 compared with individuals with sleep duration 6–8 h, (7.3 vs 3.3%;  $\chi^2 = 72.20$ ,  $p < 0.001$ ).  
29 Individuals with sleep duration  $> 8$  h also had also had higher prevalence of IFG (6.2 vs 3.3%;  
30  $\chi^2 = 37.78$ ,  $p < 0.001$ ).  
31  
32  
33  
34  
35  
36  
37  
38  
39  
40  
41  
42  
43  
44  
45

### 46 Comparison of PSQI scores between the volunteers with IFG and NGT

47 Volunteers with IFG had significantly higher global PSQI scores than those with NGT. For  
48 all PSQI items except sleep duration, there were significant differences ( $p < 0.05$ ) in PSQI  
49 scores between the two groups (Table 3) even after adjusted age.  
50

### 51 The association of sleep time and quality with IFG

52 Individuals with short sleep duration or long sleep duration had significantly increased risk of  
53 IFG compared with those with good sleep quality and sleep duration 6–8 h (OR: 2.16; 95%  
54 CI: 1.33–3.47; OR: 1.89; 95% CI: 1.50–2.34; respectively. all  $P < 0.001$ ), after adjusting for  
55 confounders (See table 3). Individuals with poor sleep quality had significantly increased risk  
56 of IFG compared with those with good sleep quality (OR: 1.98; 95% CI: 1.69–2.21;  $P < 0.001$ ),  
57  
58  
59  
60

after adjusting for confounders (See table 4).

### **Biological interaction of sleep quality and sleep duration on the prevalence of IFG**

We used a combined effects method to assess interaction, with the  $p$  value of the interaction term indicating statistical significance of additive interactions. Individuals with poor sleep quality or short sleep duration had significantly increased risk of IFG compared with those with good sleep quality and sleep duration 6–8 h (OR: 2.48; 95% CI: 2.12–3.03; OR: 2.79; 95% CI: 2.19–3.58; respectively. all  $P < 0.001$ ), after adjusting for confounders. Table 5 shows the results from the multiple logistic regression models. The prevalence of IFG was greatest in those with poor sleep quality and short sleep duration (OR: 6.37; 95% CI: 4.66–8.67;  $p < 0.001$ ), after adjusting for confounders. In addition, individuals with long sleep duration had a significantly increased risk of IFG compared with those who had good sleep quality and sleep duration of 6–8 h (OR: 2.37; 95% CI: 1.89–2.96;  $p < 0.001$ ), after adjusting for confounders. The prevalence of IFG was also greater in those with good sleep quality with long sleep duration (OR: 3.17; 95% CI: 2.29–4.41;  $p < 0.001$ ), compared with those with 6–8 h sleep duration, after adjusting for confounders.

### **Sensitivity analysis**

There was a strong additive interaction between poor sleep quality and short sleep duration (RERI: 1.69; 95% CI: 0.31–3.76.), with 42% of occurring IFG attributed to the interaction between poor sleep quality and short sleep duration (Table 5). There was also interaction between good sleep quality and long sleep duration (RERI: 0.78; 95% CI: 0.12–1.43), with 61% of occurring IFG attributed to the interaction between good sleep quality and long sleep duration (Table 6).

### **Discussion**

The two main findings of this study were, firstly, that there is combined interaction of poor sleep quality and short sleep duration on the prevalence of IFG. Secondly, that total PSQI scores of volunteers with IFG were higher than those of volunteers with NGT. We also found that poor sleep quality and short or long sleep duration increased risk for IFG in a Chinese population, independent of potential confounders such as age, obesity, family history of diabetes, alcohol consumption, smoking, physical activity, and other diseases.

Numerous epidemiologic studies have demonstrated associations between short or long sleep duration and sleep disturbances and diabetes.<sup>17–23</sup> However, few articles focused on IFG, and the results of these are inconsistent.<sup>5,24</sup> Rafalson et al.<sup>5</sup> reported the OR of IFG among short sleepers was 3.0 (95% CI: 1.05–8.59) compared with mid-range sleepers with multivariate conditional logistic regression after adjustment for several diabetes risk factors. Hung et al.<sup>24</sup> reported no association between IFG and poor sleepers. Our findings are

consistent with the report by Rafalson et al.

1 The global PSQI scores in volunteers with IFG were higher than those in volunteers with  
2 NGT, which was consistent with the Hung et al. report.<sup>24</sup> However, there was no difference in  
3 sleep duration scores between the volunteers with IFG and the volunteers with NGT. This  
4 could be attributed to the fact that 18.3% (116/634) of the volunteers with IFG were long  
5 sleepers, while short sleepers with IFG only accounted for 22.9% (145/634).  
6  
7

8 Short sleep duration increases appetite. After four nights of 4.5 h in bed, compared with  
9 after four nights of 8.5 h in bed, caloric intake, especially of carbohydrate-rich nutrients,  
10 increased by 14% in young normal-weight men and women.<sup>25, 26</sup> Middle-aged obese  
11 volunteers submitted to four to five nights of restriction of their habitual sleep schedule by  
12 2–3 h/night ate 15% more calories than those whose habitual sleep schedule was extended by  
13 the same amount.<sup>27</sup> In volunteers with sleep debt, glucose tolerance, glucose effectiveness and  
14 insulin sensitivity are decreased, and beta-cell function is reduced.<sup>6,26,28,29</sup> Sleep loss also  
15 results in decreased anorexigenic leptin levels,<sup>30-32</sup> especially in volunteers with chronic sleep  
16 restriction.<sup>33</sup> Observational epidemiologic studies have also shown reduced leptin levels, after  
17 controlling for BMI or adiposity, in habitual short sleepers.<sup>33, 34</sup> Conversely, leptin deficiency  
18 disrupts sleep architecture and impairs sleep consolidation.<sup>35</sup> Taken together, these data  
19 suggest that sleep loss is likely to have a profound impact on IFG.  
20  
21

22 Poor sleep quality, independent of sleep duration, impairs glucose regulation in healthy  
23 young adults.<sup>36, 37</sup> After three nights of slow-wave sleep suppression, insulin sensitivity is  
24 decreased by ~25%, reaching the level reported in older adults and in populations at high risk  
25 of diabetes.<sup>38</sup> The decrease in insulin sensitivity is not compensated for by an increase in  
26 insulin release. Consequently, the disposition index is ~20% lower. Consistent with an  
27 increased diabetes risk, glucose tolerance is reduced by ~23% reaching the range typical of  
28 older adults with impaired glucose tolerance.<sup>37</sup> Sleep fragmentation also increases  
29 sympathetic activity, which in turn leads to disorders of glucose metabolism.<sup>39</sup>  
30  
31

32 Taken together, short sleep duration, increased caloric intake, poor sleep quality,  
33 decreased leptin levels, decreased insulin sensitivity and increased sympathetic activity affect  
34 each other, creating a vicious circle, which elevates the risk of IFG.  
35  
36

37 Despite the absence of the synergistic effect of good-quality sleep with long sleep  
38 duration, a strong association of IFG with long sleep duration in individuals was observed,  
39 suggesting an independent effect of long sleep duration.  
40  
41

42 This study had several potential limitations. Firstly, because of the cross-sectional design,  
43 we could not determine a causal relationship between sleep quality, sleep duration and IFG.  
44 Secondly, we were not able to control for some important and well-known risk factors of  
45 diabetes, for example, snoring.<sup>40</sup> Thirdly, we did not measure poor diet, which is causally  
46 related to type 2 diabetes and may also influence sleep patterns.<sup>41,42</sup>  
47  
48

49 There are several notable strengths of this study. Participants were randomly selected  
50  
51  
52  
53  
54  
55  
56  
57  
58  
59  
60

1  
2  
3  
4  
5  
6  
7  
8  
9  
10  
11  
12  
13  
14  
15  
16  
17  
18  
19  
20  
21  
22  
23  
24  
25  
26  
27  
28  
29  
30  
31  
32  
33  
34  
35  
36  
37  
38  
39  
40  
41  
42  
43  
44  
45  
46  
47  
48  
49  
50  
51  
52  
53  
54  
55  
56  
57  
58  
59  
60

from the general population of Xuzhou. In addition, the sample was large. Many confounding risk factors were adjusted for.

In summary, volunteers who experience short sleep durations are six times more likely to develop IFG than those whose average sleep was 6–8 h a night with good sleep quality. The joint effect of short sleep duration and poor sleep quality was positive.

### Acknowledgments

This research was funded by the Preventive Medicine research projects of Jiangsu Province Health Department in 2012 (Y2012025) and the Science and Technology projects of Xuzhou City in 2011 (XF11C090). Double-Hundred Talents Project of Xuzhou city in 2012(BRA201224)

### Conflict of Interest Statement

None of the authors have a financial relationship with a commercial entity that has an interest in the subject of this manuscript. The researchers were independent from funders. The study funders had no influence on the study design, data collection, analysis, interpretation of data, writing of the report, or decision to submit the article for publication.

**Contributors** Steering Committee: PL (principal investigator), PC (principal investigator), PC and LZ. Operating Committee: LZ,PZ, GC, NZ, TL and CQ.

### References

1. Yang W, Lu J, Weng J, et al. China National Diabetes and Metabolic Disorders Study Group. Prevalence of diabetes among men and women in China. *N Engl J Med* 2010; 362:1090-1 101.
2. Li G, Zhang P, Wang J, et al. The long-term effect of lifestyle interventions to prevent diabetes in the China Da Qing Diabetes Prevention Study: a 20-year follow-up study. *Lancet* 2008; 24;371(9626):1783-9.
3. Lou P, Chen P, Yu J, et al. Analysis on the risk factors of the residents with impaired fasting glucose in Xuzhou. *Chin J Dis Control Prev* 2011; 15( 3) : 192-195. (In Chinese)
4. Najafian J, Mohamadifard N, Siadat ZD, et al. Association between sleep duration and diabetes mellitus: Isfahan Healthy Heart Program. *Niger J Clin Pract* 2013; 16(1):59-62.
5. Rafalson L, Donahue RP, Stranges S, Lamonte MJ, et al. Short sleep duration is associated



with the development of impaired fasting glucose: the Western New York Health Study.

Ann Epidemiol 2010; 20(12):883-9.

6. Spiegel K, Leproult R, Van Cauter E. Impact of sleep debt on metabolic and endocrine function. *Lancet* 1999; 354:1435-9.
7. Lou P, Chen P, Zhang L, et al. Relation study of sleep quality and sleep duration to type 2 diabetes: a population-based cross-sectional survey. *BMJ Open* 2012; 2:e000956.13.
8. Wu H, Lou P, Chen P, et al. survey the relationship between sleep quality and T2DM. *Chin J Diabetes* 2013; 21(4): 330-333. (In Chinese)
9. Chen P, Lou P, Yu J, et al. Risk factors of diabetes mellitus of residents living in Xuzhou city. *Chin J Health Manage* 2010; 4:78-80. (In Chinese)
10. Buysse DJ, Reynolds CF 3rd, Monk TH, et al. The Pittsburgh Sleep Quality Index: a new instrument for psychiatric practice and research. *Psychiatry Res* 1989; 28(2): 193–213.
11. Diagnosis and classification of diabetes mellitus. *Diabetes Care*, 2010. 33 Suppl 1: p. S62-9
12. Tsai, PS, Wang, SY, Wang, MY, et al. Psychometric evaluation of the Chinese version of the Pittsburgh Sleep Quality Index (CPSQI) in primary insomnia and control subjects. *Qual Life Res* 2005; 14(8):1943–1952.
13. Cooperative Meta-analysis Group of China Obesity Task Force. Predictive values of body mass index and waist circumference to risk factors of related disease in Chinese adult population. *Chin J Epidemiol* 2002; 23: 5-10.
14. Rothman KJ, Greenland S, Lash T L. *Modern epidemiology*, 3rd edition [M]. Philadelphia: Lippincott Williams & Wilkins, 2008.
15. Hosmer DW, Lemeshow S. Confidence interval estimation of interaction. *Epidemiology* 1992; 3(5):452-456.
16. Knol MJ, VanderWeele TJ, Groenwold RHH, et al. Estimating measures of interaction on an additive scale for preventive exposures. *Eur J Epidemiol* 2011; 26(6):433–438.
17. Gottlieb DJ, Punjabi NM, Newman AB, et al. Association of sleep time with diabetes mellitus and impaired glucose tolerance. *Arch Intern Med* 2005 ;165: 863–868.
18. Yaggi HK, Araujo AB, McKinlay JB. Sleep duration as a risk factor for the development of type 2 diabetes. *Diabetes Care* 2006; 29: 657-661

- 1  
2  
3  
4  
5  
6  
7  
8  
9  
10  
11  
12  
13  
14  
15  
16  
17  
18  
19  
20  
21  
22  
23  
24  
25  
26  
27  
28  
29  
30  
31  
32  
33  
34  
35  
36  
37  
38  
39  
40  
41  
42  
43  
44  
45  
46  
47  
48  
49  
50  
51  
52  
53  
54  
55  
56  
57  
58  
59  
60
19. Hayashino Y, Fukuhara S, Suzukamo Y, et al. Relation between sleep quality and quantity, quality of life, and risk of developing diabetes in healthy workers in Japan: the High-risk and Population Strategy for Occupational Health Promotion (HIPOP-OHP) Study. *BMC Public Health* 2007;7: 129.
20. Shankar A, Syamala S, Kalidindi S. Insufficient Rest or Sleep and Its Relation to Cardiovascular Disease, Diabetes and Obesity in a National, Multiethnic Sample. *PLoS ONE* 2010; 5(11): e14189.
21. Mallon L, Broman JE, Hetta J. High Incidence of Diabetes in Men With Sleep Complaints or Short Sleep Duration -A 12-year follow-up study of a middle-aged population. *Diabetes Care* 2005;28:2762–2767.
22. Nilsson PM, RÖÖst M, Engström M, et al. Incidence of Diabetes in Middle-Aged Men Is Related to Sleep Disturbances. *Diabetes Care* 2004;27:2464–2469.
23. Vgontzas AN, Liao D, Pejovic S, et al. Insomnia With Objective Short Sleep Duration Is Associated With Type 2 Diabetes : A population-based study. *Diabetes Care* 2009;32:1980–1985.
24. Hung HC, Yang YC, Ou HY, et al. The relationship between impaired fasting glucose and self-reported sleep quality in a Chinese population. *Clin Endocrinol (Oxf)* 2013;78(4):518-24.
25. Tasali E, Leproult R, Spiegel K. Reduced sleep duration or quality: relationships with insulin resistance and type 2 diabetes. *Prog Cardiovasc Dis* 2009; 51:381–391.
26. Nedeltcheva AV, Kessler L, Imperial J, et al. Exposure to recurrent sleep restriction in the setting of high caloric intake and physical inactivity results in increased insulin resistance and reduced glucose tolerance. *J Clin Endocrinol Metabol* 2009; 94:3242–3250.
27. Morselli L, Balbo M, Van Cauter E, et al. Impact of sleep restriction on the regulation of appetite in middle-aged obese subjects. 4th International World Sleep Congress; Quebec City, Québec. 2011.
28. Buxton OM, Pavlova M, Reid EW, et al. Sleep restriction for 1 week reduces insulin sensitivity in healthy men. *Diabetes* 2010; 59:2126–2133.



- 1  
2  
3  
4  
5  
6  
7  
8  
9  
10  
11  
12  
13  
14  
15  
16  
17  
18  
19  
20  
21  
22  
23  
24  
25  
26  
27  
28  
29  
30  
31  
32  
33  
34  
35  
36  
37  
38  
39  
40  
41  
42  
43  
44  
45  
46  
47  
48  
49  
50  
51  
52  
53  
54  
55  
56  
57  
58  
59  
60
29. Simpson NS, Banks S, Dinges DF. Sleep restriction is associated with increased morning plasma leptin concentrations, especially in women. *Biol Res Nurs* 2010; 12:47–53.
30. Guilleminault C, Powell NB, Martinez S, et al. Preliminary observations on the effects of sleep time in a sleep restriction paradigm. *Sleep Med.* 2003; 4:177–184.
31. Spiegel K, Leproult R, L'hermite-Balériaux M, et al. Leptin levels are dependent on sleep duration: relationships with sympathovagal balance, carbohydrate regulation, cortisol, and thyrotropin. *J Clin Endocrinol Metabol* 2004; 89(11):5762–5771.
32. Spiegel K, Tasali E, Penev P, et al. Sleep curtailment in healthy young men is associated with decreased leptin levels, elevated ghrelin levels, and increased hunger and appetite. *Ann Intern Med* 2004; 141:846–850.
33. Taheri S, Lin L, Austin D, et al. Short sleep duration is associated with reduced leptin, elevated ghrelin, and increased body mass index. *PLoS Med* 2004; 1:e62.
34. Chaput JP, Despres JP, Bouchard C, et al. Short sleep duration is associated with reduced leptin levels and increased adiposity: results from the Quebec family study. *Obesity (Silver Spring, Md)* 2007; 15:253–261.
35. Laposky AD, Shelton J, Bass J, et al. Altered sleep regulation in leptin-deficient mice. *Am J Physiol Regul Integr Comp Physiol* 2006; 290:R894–R903.
36. Stamatakis KA, Punjabi NM. Effects of sleep fragmentation on glucose metabolism in normal subjects. *Chest* 2010; 137:95–101.
37. Tasali E, Leproult R, Ehrmann DA, et al. Slow-wave sleep and the risk of type 2 diabetes in humans. *Proc Natl Acad Sci USA* 2008; 105:1044–1049.
38. Bergman RN. Lilly lecture 1989. Toward physiological understanding of glucose tolerance. Minimal-model approach. *Diabetes* 1989; 38:1512–1527
39. Peltier AC, Consens FB, Sheikh K, et al. Autonomic dysfunction in obstructive sleep apnea is associated with impaired glucose regulation. *Sleep Medicine* 2007.8(2): 149–155.
40. Al-Delaimy WK, Manson JE, Willett WC, et al. Snoring as a risk factor for type II diabetes mellitus: a prospective study. *Am J Epidemiol* 2002 ;155:387–393,

41. Tonstad SMD, Butler T, Yan R, et al. Type of Vegetarian Diet, Body Weight, and

Prevalence of Type 2 Diabetes. *Diabetes Care* 2009;32(8):791-796.

42. Grandner MA, Kripke DF, Naidoo N, et al. Linger Relationships among dietary nutrients and subjective sleep, objective sleep, and napping in women. *Sleep Med* 2010; 11: 180.

For peer review only

**Table 1** Baseline characteristics of the study population (N = 15,145)

| Reported variable                 | All       | IFG            |             |        |
|-----------------------------------|-----------|----------------|-------------|--------|
|                                   |           | No             | Yes         | P      |
|                                   | 15145     | 14,511(95.81%) | 634(4.19%)  |        |
| Age(years)                        | 47.6±15.1 | 47.4±14.7      | 52.2±16.2   | 8.012  |
| ≥45 years                         | 8362      | 7928(94.81%)   | 434(5.19%)  | 0.000  |
| Sex(% man)                        | 49.9      | 50.0           | 49.8        | 0.938  |
| Rural (%)                         | 72.4      | 72.4           | 72.9        | 0.795  |
| Manual                            | 10833     | 10359(95.62%)  | 474(4.38%)  | 0.023  |
| Non-manual                        | 1045      | 1016(97.22%)   | 29(2.78%)   |        |
| Unemployed                        | 677       | 658(97.19%)    | 19(2.81%)   |        |
| retired                           | 2590      | 2478(95.68%)   | 112(4.32%)  |        |
| Married (living with partners)(%) | 88.5      | 88.6           | 86.3        | 0.073  |
| Below high school                 | 11899     | 11400(95.81%)  | 499(4.19%)  | 0.986  |
| high school                       | 1760      | 1686(95.80%)   | 74(4.20%)   |        |
| Above high school                 | 1486      | 1425(95.90%)   | 61(4.10%)   |        |
| smoker                            | 3541      | 3367(95.09%)   | 174(4.91%)  | 0.014  |
| alcohol use                       | 2872      | 2752(95.82%)   | 120(4.18%)  | 0.981  |
| Regular exercise                  | 2559      | 2452(95.82%)   | 107(4.18%)  | 0.989  |
| Family history of diabetes        | 483       | 362(74.95%)    | 121(25.05%) | 0.000  |
| BMI, mean(SD)                     | 23.9±4.7  | 23.8±5.8       | 25.2±4.1    | <0.001 |
| Central obesity                   | 4613      | 4219(91.46%)   | 394(8.54%)  | 0.000  |
| Hypertension                      | 3060      | 2901(94.80%)   | 159(5.20%)  | 0.002  |
| Sleep duration(hour)              |           |                |             |        |
| ≤6                                | 1984      | 1839(92.70%)   | 145(7.30%)  | 0.000  |
| 6-8                               | 11292     | 10919(96.70%)  | 373(3.30%)  |        |
| ≥8                                | 1869      | 1753(93.80%)   | 116(6.20%)  |        |
| Sleep quality                     |           |                |             |        |
| Good                              | 11209     | 10840(96.71%)  | 369(3.29%)  | 0.000  |
| Poor                              | 3936      | 3671(93.27%)   | 265(6.73%)  |        |

Table 2. Comparison of characteristics between individuals with poor sleep quality and sleep duration <6h and controls

| Reported variable                | All       | Poor sleep quality with short sleep time(<6h) |               |      |
|----------------------------------|-----------|-----------------------------------------------|---------------|------|
|                                  |           | Yes                                           | No            | P    |
|                                  | 15145     | 602                                           | 14543         |      |
| Age(years)                       | 47.6±15.1 | 47.8±15.5                                     | 47.5±15.1     | 0.63 |
| Sex(man)                         | 7557      | 299(3.96%)                                    | 7258(96.04%)  | 0.91 |
| Rural                            | 10965     | 435(3.97%)                                    | 10530(96.03%) | 0.94 |
| Manual                           | 10833     | 421(3.89%)                                    | 10412(96.11%) | 0.38 |
| Non-manual                       | 1045      | 44(4.21%)                                     | 1001(95.79%)  | 0.69 |
| Unemployed                       | 677       | 35(5.17%)                                     | 642(94.83%)   | 0.10 |
| retired                          | 2590      | 102(3.94%)                                    | 2488(96.06%)  | 0.92 |
| Marred (living with partners)(%) | 13403     | 535(3.99%)                                    | 12868(96.01%) | 0.77 |
| Below high school                | 11899     | 470(3.95%)                                    | 11429(96.05%) | 0.76 |
| high school                      | 1760      | 70(3.98%)                                     | 1690(96.02%)  | 1    |
| Above high school                | 1486      | 62(4.17%)                                     | 1424(95.83%)  | 0.68 |
| smoker                           | 3541      | 145(4.09%)                                    | 3396(95.91%)  | 0.68 |
| alcohol use                      | 2872      | 121(4.21%)                                    | 2751(98.79%)  | 0.48 |
| Regular exercise                 | 2559      | 92(3.60%)                                     | 2467(96.40%)  | 0.28 |
| Family history of diabetes       | 483       | 20(4.14%)                                     | 463(95.86%)   | 0.85 |
| BMI, mean(SD)                    | 23.9±4.7  | 24.0±4.9                                      | 23.9±4.6      | 0.60 |
| Central obesity                  | 4613      | 186(4.03%)                                    | 4427(95.97%)  | 0.81 |
| Hypertension                     | 3060      | 131(4.28%)                                    | 2929(95.72%)  | 0.33 |

**Table 3** Comparison of Pittsburgh Sleep Quality Index scores between individuals with impaired fasting glucose and controls ( $\bar{x}$   $\pm$  sd)

| <i>Items</i>             | <i>IFG</i>        |                   | <i>F value</i> | <i>P</i> |
|--------------------------|-------------------|-------------------|----------------|----------|
|                          | No                | Yes               |                |          |
| Subjective sleep quality | 0.415 $\pm$ 0.013 | 0.463 $\pm$ 0.03  | 31.823         | 0.000    |
| Sleep latency            | 0.742 $\pm$ 0.004 | 0.800 $\pm$ 0.016 | 27.446         | 0.000    |
| Sleep duration           | 0.152 $\pm$ 0.002 | 0.159 $\pm$ 0.001 | 0.503          | 0.478    |
| Sleep efficiency         | 0.444 $\pm$ 0.003 | 0.321 $\pm$ 0.001 | 29.452         | 0.000    |
| Sleep disturbance        | 0.591 $\pm$ 0.003 | 0.658 $\pm$ 0.012 | 28.259         | 0.000    |
| Use of hypnotic          | 0.051 $\pm$ 0.002 | 0.065 $\pm$ 0.007 | 16.651         | 0.000    |
| Daytime dysfunction      | 0.147 $\pm$ 0.011 | 0.170 $\pm$ 0.002 | 9.725          | 0.000    |
| Global PSQI scores       | 2.302 $\pm$ 0.009 | 2.495 $\pm$ 0.041 | 20.957         | 0.000    |

Using analysis of covariance, Covariates for age =47.6 years old

Table 4 Odds ratios for the association between sleep quality, sleep duration and impaired fasting glucose among participants

| Variables      |      | IFG | No IFG | OR (95%CI)       | P     |
|----------------|------|-----|--------|------------------|-------|
| Sleep quality  | Good | 369 | 10840  | 1                | 0.000 |
|                | Poor | 265 | 3671   | 1.21(1.09-1.34)  |       |
| Sleep duration | 6-8h | 373 | 10919  | 1                | 0.000 |
|                | <6h  | 145 | 1839   | 2.16 (1.33-3.47) |       |
|                | >8h  | 116 | 1753   | 1.89 (1.50-2.34) |       |

Adjusted for age, sex, education, employment, BMI, family history of diabetes, smoking status, alcohol consumption and physical activity.

**Table 5** Odds ratios for the association between sleep quality and impaired fasting glucose by sleep duration among participants

| <i>Sleep duration</i> | <i>Sleep quality</i> | <i>IFG</i> | <i>No IFG</i> | <i>OR (95%CI)</i> | <i>P</i> |
|-----------------------|----------------------|------------|---------------|-------------------|----------|
| 6-8h                  | Good                 | 246        | 8743          | 1                 |          |
|                       | Poor                 | 127        | 2176          | 1.98 (1.76-2.52)  | <0.001   |
| <6h                   | Good                 | 53         | 1329          | 1.38 (1.12-1.61)  | <0.001   |
|                       | Poor                 | 92         | 510           | 6.37 (4.66-8.67)  | <0.001   |
| >8h                   | Good                 | 70         | 768           | 3.17 (2.29-4.41)  | <0.001   |
|                       | Poor                 | 46         | 985           | 1.59 (1.08-2.29)  | <0.001   |

Adjusted for age, sex, education, employment, BMI, family history of diabetes, smoking status, alcohol consumption and physical activity.

**Table 6** Measures for estimation of the biological interaction between sleep quality and sleep duration for the prevalence of impaired fasting glucose in participants

| Measures of biological interaction            | Estimate (95% CI)    |
|-----------------------------------------------|----------------------|
| Poor sleep quality versus sleep duration < 6h |                      |
| RERI                                          | 1.69(0.31 – 3.76)    |
| AP                                            | 0.42(0.15 – 0.61)    |
| S                                             | 2.85(2.14 – 3.92)    |
| Good sleep quality versus sleep duration > 8h |                      |
| RERI                                          | 0.78(0.12 – 1.43)    |
| AP                                            | 0.61(0.26 – 0.87)    |
| S                                             | -0.65(-0.94 – -0.27) |

Reference group is good sleep quality with 6-8 sleep duration.

Adjusted for age, sex, education, occupation, BMI, family history of diabetes, smoking status, alcohol consumption, and hypertension.



## STROBE Statement—checklist of items that should be included in reports of observational studies

|                          | Item No | Recommendation                                                                                                                                                                                                                                                                                                                                                                                                                                                         |          |
|--------------------------|---------|------------------------------------------------------------------------------------------------------------------------------------------------------------------------------------------------------------------------------------------------------------------------------------------------------------------------------------------------------------------------------------------------------------------------------------------------------------------------|----------|
| Title and abstract       | 1       | (a) Indicate the study's design with a commonly used term in the title or the abstract                                                                                                                                                                                                                                                                                                                                                                                 | Page 1   |
|                          |         | (b) Provide in the abstract an informative and balanced summary of what was done and what was found                                                                                                                                                                                                                                                                                                                                                                    | Page 2   |
| <b>Introduction</b>      |         |                                                                                                                                                                                                                                                                                                                                                                                                                                                                        |          |
| Background/rationale     | 2       | Explain the scientific background and rationale for the investigation being reported                                                                                                                                                                                                                                                                                                                                                                                   | Page 3   |
| Objectives               | 3       | State specific objectives, including any prespecified hypotheses                                                                                                                                                                                                                                                                                                                                                                                                       | Page 3   |
| <b>Methods</b>           |         |                                                                                                                                                                                                                                                                                                                                                                                                                                                                        |          |
| Study design             | 4       | Present key elements of study design early in the paper                                                                                                                                                                                                                                                                                                                                                                                                                | Page 3   |
| Setting                  | 5       | Describe the setting, locations, and relevant dates, including periods of recruitment, exposure, follow-up, and data collection                                                                                                                                                                                                                                                                                                                                        | Page 3-4 |
| Participants             | 6       | (a) <i>Cohort study</i> —Give the eligibility criteria, and the sources and methods of selection of participants. Describe methods of follow-up<br><i>Case-control study</i> —Give the eligibility criteria, and the sources and methods of case ascertainment and control selection. Give the rationale for the choice of cases and controls<br><i>Cross-sectional study</i> —Give the eligibility criteria, and the sources and methods of selection of participants | Page 4   |
|                          |         | (b) <i>Cohort study</i> —For matched studies, give matching criteria and number of exposed and unexposed<br><i>Case-control study</i> —For matched studies, give matching criteria and the number of controls per case                                                                                                                                                                                                                                                 |          |
| Variables                | 7       | Clearly define all outcomes, exposures, predictors, potential confounders, and effect modifiers. Give diagnostic criteria, if applicable                                                                                                                                                                                                                                                                                                                               | Page 4-5 |
| Data sources/measurement | 8*      | For each variable of interest, give sources of data and details of methods of assessment (measurement). Describe comparability of assessment methods if there is more than one group                                                                                                                                                                                                                                                                                   | Page 4-5 |
| Bias                     | 9       | Describe any efforts to address potential sources of bias                                                                                                                                                                                                                                                                                                                                                                                                              |          |
| Study size               | 10      | Explain how the study size was arrived at                                                                                                                                                                                                                                                                                                                                                                                                                              | Page 4   |
| Quantitative variables   | 11      | Explain how quantitative variables were handled in the analyses. If applicable, describe which groupings were chosen and why                                                                                                                                                                                                                                                                                                                                           | Page 4-5 |
| Statistical methods      | 12      | (a) Describe all statistical methods, including those used to control for confounding                                                                                                                                                                                                                                                                                                                                                                                  | Page 5   |
|                          |         | (b) Describe any methods used to examine subgroups and interactions                                                                                                                                                                                                                                                                                                                                                                                                    | Page 5   |
|                          |         | (c) Explain how missing data were addressed                                                                                                                                                                                                                                                                                                                                                                                                                            |          |
|                          |         | (d) <i>Cohort study</i> —If applicable, explain how loss to follow-up was addressed<br><i>Case-control study</i> —If applicable, explain how matching of cases and controls was addressed<br><i>Cross-sectional study</i> —If applicable, describe analytical methods taking account of sampling strategy                                                                                                                                                              | Page 5   |
|                          |         | (e) Describe any sensitivity analyses                                                                                                                                                                                                                                                                                                                                                                                                                                  | Page 5   |

| <b>Results</b>           |     |                                                                                                                                                                                                              |          |
|--------------------------|-----|--------------------------------------------------------------------------------------------------------------------------------------------------------------------------------------------------------------|----------|
| Participants             | 13* | (a) Report numbers of individuals at each stage of study—eg numbers potentially eligible, examined for eligibility, confirmed eligible, included in the study, completing follow-up, and analysed            | Page 6   |
|                          |     | (b) Give reasons for non-participation at each stage                                                                                                                                                         | Page 6   |
|                          |     | (c) Consider use of a flow diagram                                                                                                                                                                           | Figur1   |
| Descriptive data         | 14* | (a) Give characteristics of study participants (eg demographic, clinical, social) and information on exposures and potential confounders                                                                     | Table1   |
|                          |     | (b) Indicate number of participants with missing data for each variable of interest                                                                                                                          | Table2   |
|                          |     | (c) <i>Cohort study</i> —Summarise follow-up time (eg, average and total amount)                                                                                                                             | Page6    |
| Outcome data             | 15* | <i>Cohort study</i> —Report numbers of outcome events or summary measures over time                                                                                                                          | Page6    |
|                          |     | <i>Case-control study</i> —Report numbers in each exposure category, or summary measures of exposure                                                                                                         |          |
|                          |     | <i>Cross-sectional study</i> —Report numbers of outcome events or summary measures                                                                                                                           |          |
| Main results             | 16  | (a) Give unadjusted estimates and, if applicable, confounder-adjusted estimates and their precision (eg, 95% confidence interval). Make clear which confounders were adjusted for and why they were included | Table3-5 |
|                          |     | (b) Report category boundaries when continuous variables were categorized                                                                                                                                    | Page7    |
|                          |     | (c) If relevant, consider translating estimates of relative risk into absolute risk for a meaningful time period                                                                                             |          |
| Other analyses           | 17  | Report other analyses done—eg analyses of subgroups and interactions, and sensitivity analyses                                                                                                               |          |
| <b>Discussion</b>        |     |                                                                                                                                                                                                              |          |
| Key results              | 18  | Summarise key results with reference to study objectives                                                                                                                                                     | Page8    |
| Limitations              | 19  | Discuss limitations of the study, taking into account sources of potential bias or imprecision. Discuss both direction and magnitude of any potential bias                                                   | Page10   |
| Interpretation           | 20  | Give a cautious overall interpretation of results considering objectives, limitations, multiplicity of analyses, results from similar studies, and other relevant evidence                                   | Page10   |
| Generalisability         | 21  | Discuss the generalisability (external validity) of the study results                                                                                                                                        | Page10   |
| <b>Other information</b> |     |                                                                                                                                                                                                              |          |
| Funding                  | 22  | Give the source of funding and the role of the funders for the present study and, if applicable, for the original study on which the present article is based                                                | Page11   |

\*Give information separately for cases and controls in case-control studies and, if applicable, for exposed and unexposed groups in cohort and cross-sectional studies.
